# Supplementary material for: Safe and sustainable chemicals and materials: a review of sustainability assessment frameworks
Source: Royal Society of Chemistry journal article supplement (doi:10.1039/d3gc04598f), 2024-01-01
Supplement: d3gc04598f1.xlsx [file d3gc04598f1.xlsx]

## Sheet: Sheet2
Abdel-Basset et al	2021
Acar et al	2018
Acar et al	2022
Agrawal	2021
Ahmad et al	2015
Ahmed et al	2019
AISE	2019
Aktar et al	2014
alGhatta et al	2021
alfonsi et al	2008
alkhatib et al	2021
Andraos	2009
Arias et al	2021
Arora et al	2016
Asadi et al	2016
Bakhoum and Brown	2013
Balali et al	2020
Banimosfafa et al	2012
Barbosa et al	2019
BASF	2018
Blue Angel
Bluesign
Boyes et al	2015
Brignon	2011
Bystrzanowska et al	2019
C2C	2021
Calvo-Serrano	2019
Capello et al	2007
CEFIC	2021
Cervera-Padrell et al	2012
Chavarrio et al	2020
CHEMSEC	2021
Chen et al	2021
Cignitti et al	2018
Clariant Eco Tain
CLiCC	2021
Crivellari et al	2021
Curzons et al	2007
Dinh et al	2009
Ecodesign Directive (Directive 2009/125/EC)	2009
EEA	2020
Energy Label Directive (2010/30/EU – revised EU 2017/1369)	2010
EU Ecolabel (EU 2010/66)	2010
EU Green public procurement (COM 2008/400)	2008
EU Proposal 2020/0353 concerning batteries and waste batteries, repealing Directive 2006/66/EC and amending	2020
EU Proposal 2020/852 Sustainable Finance	2020
EVONIK	2020
Falqui et al	2019
Fantke et al	2016
Fantke et al	2020
Figueiredo et al	2021
Fleitmann et al	2021
Fu et al	2016
Gani et al	2005
Garas et al	2020
GEC	2019
Gonzalez et al	2019
Gonzalez-Garay and Guillen-Gosalbez	2018
GOTS
Green Seal
Greensuite®
Groetsch et al	2021
GRS	2011
Halim and Srinivasan	2008
Hap et al	2022
Hatefi et al	2021
Henderson et al	2011
Higg product tool
Hossain et al	2022
IC2	2017
IEEE	2018
IFRA-IOFI	2021
Isoni et al	2016
Janošovský et al	2022
Jayakrishna et al	2016
Jia et al	2016
Jiménez-Gonzalez et al	2004
Jolliffe and Gerogiorgis	2017
Kicherer et al	2007
Kokosa	2019
Li et al	2011
Liew et al	2013
Limlemthing et al	2016
Linke et al	2020
Ma et al	2018
Malloy et al	2013
Markatos and Pantelakis	2022
Martin	2016
Martínez-Gallegos et al	2015
Moradian et al	2019
Moralles at al	2016
Moretti et al	2017
MTS	2012
Narayanam et al	2007
NATRUE	2021
Natureplus	2017
Nkambule and Blignaut	2017
Nordic Swan Ecolabel
NRC	2014
OECD	2018
Oguzcan et al	2019
Okokpujie
Ooi	2019
Ooi et al	2018
Opn	2022
Patel et al	2013
Piccino et al	2016
Pinheiro et al	2018
Pistikopoulos and Stefanis	1998
Platform on Sustainable Finance	2021
Posada et al	2013
Prat et al	2013
Prat et al	2015
Reddy et al	2018
Reinhardt et al	2008
Rincon et al	2020
Rossi	2012
Rossi et al	2006
Rycroft et al	2019
Saavalainen et al	2015
Saeli et al	2020
Salieri et al	2021
Samani et al	2015
Scheneider et al	2022
Schoubroeck et al	2019
SCP	2020
Segger and Kappenthuler	2020
Segger and Kappenthuler	2021
Sell et al	2014
Sherman et al	2018
Simanovska et al	2016
Smith et al	2015
Solvay 2020	2020
Stefanis et al	1996
Streimikiene at al	2020
Sugiyama et al	2008
TCO certified
The F-Gas Regulation
Tian et al	2021
UBA	2016
UN	2021
van Dijk et al	2022
Venturi et al	2020
Vinodh	2018
VinylPlus	2021
Wakeel et al	2020
Wang and Hellweg	2020
WBCSD	2018
Xu and Diwekar	2007
Xu et al	2017
Zhong et al	2017
Zimmerman et al	2020

## Sheet: Literature review-indicators
Year	Authors	Ref	Applied to early stage design	Type of document	Organization	DOI	Type	Function	Sector	LCA	LCT	Decision procedure	Uncertainty - y/n	SAFETY	Dimension	Level aspect	Indicator	Value	Dimensions covered
1996	Stefanis et al	Stefanis et al1996	1	Scientific article	Academia	https://doi.org/10.1016/0098-1354(96)00243-8	Chemicals	Solvents	not specified	0	1	0	0	1	Environmental	Climate Change	Climate change (conceptual)	1	ENV+SAF
1996	Stefanis et al	Stefanis et al1996	1	Scientific article	Academia	https://doi.org/10.1016/0098-1354(96)00243-8	Chemicals	Solvents	not specified	0	1	0	0	1	Environmental	Stratospheric ozone Depletion	Ozone depletion (conceptual)	1	ENV+SAF
1996	Stefanis et al	Stefanis et al1996	1	Scientific article	Academia	https://doi.org/10.1016/0098-1354(96)00243-8	Chemicals	Solvents	not specified	0	1	0	0	1	Environmental	Air emission	Critical air mass (%)	1	ENV+SAF
1996	Stefanis et al	Stefanis et al1996	1	Scientific article	Academia	https://doi.org/10.1016/0098-1354(96)00243-8	Chemicals	Solvents	not specified	0	1	0	0	1	Environmental	Water emission	Critical water mass (%)	1	ENV+SAF
1996	Stefanis et al	Stefanis et al1996	1	Scientific article	Academia	https://doi.org/10.1016/0098-1354(96)00243-8	Chemicals	Solvents	not specified	0	1	0	0	1	Resources-, processing, and product- related	Resources: types, quantity, and efficiency considerations	Amount of (solid/water) waste (kg or %)	1	ENV+SAF
1996	Stefanis et al	Stefanis et al1996	1	Scientific article	Academia	https://doi.org/10.1016/0098-1354(96)00243-8	Chemicals	Solvents	not specified	0	1	0	0	1	Resources-, processing, and product- related	Circularity	Boiling temperature (°C)	1	ENV+SAF
1998	Pistikopoulos and Stefanis	Pistikopoulos and Stefanis1998	1	Scientific article	Academia	https://doi.org/10.1016/S0098-1354(97)00255-1	Chemicals	Solvents	not specified	0	1	0	0	1	Environmental	Climate Change	GWP 100 (kg CO₂eq)	1	ENV+SAF
1998	Pistikopoulos and Stefanis	Pistikopoulos and Stefanis1998	1	Scientific article	Academia	https://doi.org/10.1016/S0098-1354(97)00255-1	Chemicals	Solvents	not specified	0	1	0	0	1	Environmental	Acidification	Atmospheric acidification (kg SO2eq)	1	ENV+SAF
1998	Pistikopoulos and Stefanis	Pistikopoulos and Stefanis1998	1	Scientific article	Academia	https://doi.org/10.1016/S0098-1354(97)00255-1	Chemicals	Solvents	not specified	0	1	0	0	1	Environmental	Stratospheric ozone Depletion	Ozone depletion potential (kg CFC-11)	1	ENV+SAF
1998	Pistikopoulos and Stefanis	Pistikopoulos and Stefanis1998	1	Scientific article	Academia	https://doi.org/10.1016/S0098-1354(97)00255-1	Chemicals	Solvents	not specified	0	1	0	0	1	Environmental	Photochemical Ozone Formation	POCP (kg of ethene-eq or Kg NMVOC or kg O3)	1	ENV+SAF
1998	Pistikopoulos and Stefanis	Pistikopoulos and Stefanis1998	1	Scientific article	Academia	https://doi.org/10.1016/S0098-1354(97)00255-1	Chemicals	Solvents	not specified	0	1	0	0	1	Environmental	Resources	Resource use/depletion - fossil (MJ)	1	ENV+SAF
1998	Pistikopoulos and Stefanis	Pistikopoulos and Stefanis1998	1	Scientific article	Academia	https://doi.org/10.1016/S0098-1354(97)00255-1	Chemicals	Solvents	not specified	0	1	0	0	1	Environmental	Air emission	Dimethylformamide (g)	1	ENV+SAF
1998	Pistikopoulos and Stefanis	Pistikopoulos and Stefanis1998	1	Scientific article	Academia	https://doi.org/10.1016/S0098-1354(97)00255-1	Chemicals	Solvents	not specified	0	1	0	0	1	Environmental	Air emission	Critical air mass (%)	1	ENV+SAF
1998	Pistikopoulos and Stefanis	Pistikopoulos and Stefanis1998	1	Scientific article	Academia	https://doi.org/10.1016/S0098-1354(97)00255-1	Chemicals	Solvents	not specified	0	1	0	0	1	Environmental	Water emission	Critical water mass (%)	1	ENV+SAF
1998	Pistikopoulos and Stefanis	Pistikopoulos and Stefanis1998	1	Scientific article	Academia	https://doi.org/10.1016/S0098-1354(97)00255-1	Chemicals	Solvents	not specified	0	1	0	0	1	Resources-, processing, and product- related	Resources: types, quantity, and efficiency considerations	Amount of (solid/water) waste (kg or %)	1	ENV+SAF
1998	Pistikopoulos and Stefanis	Pistikopoulos and Stefanis1998	1	Scientific article	Academia	https://doi.org/10.1016/S0098-1354(97)00255-1	Chemicals	Solvents	not specified	0	1	0	0	1	Economic	External cost	Waste (incl. emissions)/recycling treatment cost	1	ENV+SAF
2004	Jiménez-Gonzalez et al	Jiménez-Gonzalez et al2004	1	Scientific article	Industry	https://doi.org/10.1007/s10098-004-0245-z	Chemicals	Solvents	Pharmaceutical	1	0	1	0	1	Environmental	Climate Change	GWP 100 (kg CO₂eq)	1	ENV+SAF
2004	Jiménez-Gonzalez et al	Jiménez-Gonzalez et al2004	1	Scientific article	Industry	https://doi.org/10.1007/s10098-004-0245-z	Chemicals	Solvents	Pharmaceutical	1	0	1	0	1	Environmental	Acidification	Terrestrial acidification (kg SO2eq)	1	ENV+SAF
2004	Jiménez-Gonzalez et al	Jiménez-Gonzalez et al2004	1	Scientific article	Industry	https://doi.org/10.1007/s10098-004-0245-z	Chemicals	Solvents	Pharmaceutical	1	0	1	0	1	Environmental	Eutrophication	Eutrophication potential (kg of phosphate )	1	ENV+SAF
2004	Jiménez-Gonzalez et al	Jiménez-Gonzalez et al2004	1	Scientific article	Industry	https://doi.org/10.1007/s10098-004-0245-z	Chemicals	Solvents	Pharmaceutical	1	0	1	0	1	Environmental	Photochemical Ozone Formation	POCP (kg of ethene-eq or Kg NMVOC or kg O3)	1	ENV+SAF
2004	Jiménez-Gonzalez et al	Jiménez-Gonzalez et al2004	1	Scientific article	Industry	https://doi.org/10.1007/s10098-004-0245-z	Chemicals	Solvents	Pharmaceutical	1	0	1	0	1	Environmental	Water emission	Total organic carbon (kg)	1	ENV+SAF
2004	Jiménez-Gonzalez et al	Jiménez-Gonzalez et al2004	1	Scientific article	Industry	https://doi.org/10.1007/s10098-004-0245-z	Chemicals	Solvents	Pharmaceutical	1	0	1	0	1	Resources-, processing, and product- related	Resources: types, quantity, and efficiency considerations	Renewable or fossil? (yes/no)	1	ENV+SAF
2004	Jiménez-Gonzalez et al	Jiménez-Gonzalez et al2004	1	Scientific article	Industry	https://doi.org/10.1007/s10098-004-0245-z	Chemicals	Solvents	Pharmaceutical	1	0	1	0	1	Resources-, processing, and product- related	Resources: types, quantity, and efficiency considerations	Water consumption (m3)	1	ENV+SAF
2004	Jiménez-Gonzalez et al	Jiménez-Gonzalez et al2004	1	Scientific article	Industry	https://doi.org/10.1007/s10098-004-0245-z	Chemicals	Solvents	Pharmaceutical	1	0	1	0	1	Resources-, processing, and product- related	Resources: types, quantity, and efficiency considerations	Net mass of materials consumed (kg)	1	ENV+SAF
2004	Jiménez-Gonzalez et al	Jiménez-Gonzalez et al2004	1	Scientific article	Industry	https://doi.org/10.1007/s10098-004-0245-z	Chemicals	Solvents	Pharmaceutical	1	0	1	0	1	Resources-, processing, and product- related	Energy	Energy consumption (kWh or MJ)	1	ENV+SAF
2005	Gani et al	Gani et al2005	1	Scientific article	Industry	https://doi.org/10.1016/j.compchemeng.2005.02.021	Chemicals	Solvents	not specified	0	0	1	0	1	Resources-, processing, and product- related	Resources: types, quantity, and efficiency considerations	Reaction efficiency (%)	1	SAF
2005	Gani et al	Gani et al2005	1	Scientific article	Industry	https://doi.org/10.1016/j.compchemeng.2005.02.021	Chemicals	Solvents	not specified	0	0	1	0	1	Resources-, processing, and product- related	Resources: types, quantity, and efficiency considerations	Atom economy (%)	1	SAF
2005	Gani et al	Gani et al2005	1	Scientific article	Industry	https://doi.org/10.1016/j.compchemeng.2005.02.021	Chemicals	Solvents	not specified	0	0	1	0	1	Resources-, processing, and product- related	Circularity	Purity of recovered solvent (%)	1	SAF
2005	Gani et al	Gani et al2005	1	Scientific article	Industry	https://doi.org/10.1016/j.compchemeng.2005.02.021	Chemicals	Solvents	not specified	0	0	1	0	1	Resources-, processing, and product- related	Energy	Energy consumption (kWh or MJ)	1	SAF
2006	Rossi et al	Rossi et al2006	1	Guidance	Academia	http://sustainableproduction.org/downloads/FinalAltsAssess06_000.pdf	Chemicals	not specified	not specified	1	0	1	0	1	Environmental	Climate Change	GWP 100 (kg CO₂eq)	1	ENV+SAF+SOC+ECO
2006	Rossi et al	Rossi et al2006	1	Guidance	Academia	http://sustainableproduction.org/downloads/FinalAltsAssess06_000.pdf	Chemicals	not specified	not specified	1	0	1	0	1	Resources-, processing, and product- related	Circularity	Recyclability/circularity (conceptual)	1	ENV+SAF+SOC+ECO
2006	Rossi et al	Rossi et al2006	1	Guidance	Academia	http://sustainableproduction.org/downloads/FinalAltsAssess06_000.pdf	Chemicals	not specified	not specified	1	0	1	0	1	Resources-, processing, and product- related	Circularity	Recycled content (%)	1	ENV+SAF+SOC+ECO
2006	Rossi et al	Rossi et al2006	1	Guidance	Academia	http://sustainableproduction.org/downloads/FinalAltsAssess06_000.pdf	Chemicals	not specified	not specified	1	0	1	0	1	Social	workers	Workers health & safety	1	ENV+SAF+SOC+ECO
2006	Rossi et al	Rossi et al2006	1	Guidance	Academia	http://sustainableproduction.org/downloads/FinalAltsAssess06_000.pdf	Chemicals	not specified	not specified	1	0	1	0	1	Social	local community	Human rights (conceptual)	1	ENV+SAF+SOC+ECO
2006	Rossi et al	Rossi et al2006	1	Guidance	Academia	http://sustainableproduction.org/downloads/FinalAltsAssess06_000.pdf	Chemicals	not specified	not specified	1	0	1	0	1	Social	workers	Child labour	1	ENV+SAF+SOC+ECO
2006	Rossi et al	Rossi et al2006	1	Guidance	Academia	http://sustainableproduction.org/downloads/FinalAltsAssess06_000.pdf	Chemicals	not specified	not specified	1	0	1	0	1	Social	workers	Freedom of association and collective bargaining	1	ENV+SAF+SOC+ECO
2006	Rossi et al	Rossi et al2006	1	Guidance	Academia	http://sustainableproduction.org/downloads/FinalAltsAssess06_000.pdf	Chemicals	not specified	not specified	1	0	1	0	1	Economic	Profitability	Profitability (conceptual)	1	ENV+SAF+SOC+ECO
2006	Rossi et al	Rossi et al2006	1	Guidance	Academia	http://sustainableproduction.org/downloads/FinalAltsAssess06_000.pdf	Chemicals	not specified	not specified	1	0	1	0	1	Economic	Internal cost	(Total) production cost (€)	1	ENV+SAF+SOC+ECO
2007	Capello et al	Capello et al2007	1	Scientific article	Academia	https://doi.org/10.1039/b617536h	Chemicals	Solvents	chemical industry	1	0	0	0	1	Resources-, processing, and product- related	Energy	Cumulative energy demand (MJ)	1	SAF
2007	Curzons et al	Curzons et al2007	1	Scientific article	Industry	http://d1.doi.org/10.1065/lca2007.03.315	Chemicals	Solvents	not specified	1	0	1	0	1	Environmental	Eutrophication	Eutrophication potential (kg of phosphate )	1	ENV+SAF
2007	Curzons et al	Curzons et al2007	1	Scientific article	Industry	http://d1.doi.org/10.1065/lca2007.03.315	Chemicals	Solvents	not specified	1	0	1	0	1	Environmental	Photochemical Ozone Formation	POCP (kg of ethene-eq or Kg NMVOC or kg O3)	1	ENV+SAF
2007	Curzons et al	Curzons et al2007	1	Scientific article	Industry	http://d1.doi.org/10.1065/lca2007.03.315	Chemicals	Solvents	not specified	1	0	1	0	1	Environmental	Resources	Resource use/depletion - fossil (MJ)	1	ENV+SAF
2007	Curzons et al	Curzons et al2007	1	Scientific article	Industry	http://d1.doi.org/10.1065/lca2007.03.315	Chemicals	Solvents	not specified	1	0	1	0	1	Environmental	Water emission	Total organic carbon (kg)	1	ENV+SAF
2007	Curzons et al	Curzons et al2007	1	Scientific article	Industry	http://d1.doi.org/10.1065/lca2007.03.315	Chemicals	Solvents	not specified	1	0	1	0	1	Resources-, processing, and product- related	Resources: types, quantity, and efficiency considerations	Net mass of materials consumed (kg)	1	ENV+SAF
2007	Curzons et al	Curzons et al2007	1	Scientific article	Industry	http://d1.doi.org/10.1065/lca2007.03.315	Chemicals	Solvents	not specified	1	0	1	0	1	Resources-, processing, and product- related	Energy	Energy consumption (kWh or MJ)	1	ENV+SAF
2007	Kicherer et al	Kicherer et al2007	0	Scientific article	Academia	http://d1.doi.org/10.1065/lca2007.01.305	Products	not specified	chemical industry	1	0	1	0	0	Environmental	Climate Change	GWP 100 (kg CO₂eq)	1	ENV+SAF+ECO
2007	Kicherer et al	Kicherer et al2007	0	Scientific article	Academia	http://d1.doi.org/10.1065/lca2007.01.305	Products	not specified	chemical industry	1	0	1	0	0	Environmental	Toxicity	Human toxicity potential (kg 1,4 DCB eq or CTUh)	1	ENV+SAF+ECO
2007	Kicherer et al	Kicherer et al2007	0	Scientific article	Academia	http://d1.doi.org/10.1065/lca2007.01.305	Products	not specified	chemical industry	1	0	1	0	0	Environmental	Acidification	Terrestrial acidification (kg SO2eq)	1	ENV+SAF+ECO
2007	Kicherer et al	Kicherer et al2007	0	Scientific article	Academia	http://d1.doi.org/10.1065/lca2007.01.305	Products	not specified	chemical industry	1	0	1	0	0	Environmental	Photochemical Ozone Formation	POCP (kg of ethene-eq or Kg NMVOC or kg O3)	1	ENV+SAF+ECO
2007	Kicherer et al	Kicherer et al2007	0	Scientific article	Academia	http://d1.doi.org/10.1065/lca2007.01.305	Products	not specified	chemical industry	1	0	1	0	0	Environmental	Resources	Land occupation (m2a crop eq)	1	ENV+SAF+ECO
2007	Kicherer et al	Kicherer et al2007	0	Scientific article	Academia	http://d1.doi.org/10.1065/lca2007.01.305	Products	not specified	chemical industry	1	0	1	0	0	Resources-, processing, and product- related	Energy	Energy consumption (kWh or MJ)	1	ENV+SAF+ECO
2007	Kicherer et al	Kicherer et al2007	0	Scientific article	Academia	http://d1.doi.org/10.1065/lca2007.01.305	Products	not specified	chemical industry	1	0	1	0	0	Economic	External cost	Life cycle cost	1	ENV+SAF+ECO
2007	Narayanam et al	Narayanam et al2007	1	Scientific article	Academia	https://doi.org/10.1205/psep07016	Chemicals	Fuels	not specified	0	0	1	0	1	Environmental	Climate Change	GWP 100 (kg CO₂eq)	1	ENV+ECO
2007	Narayanam et al	Narayanam et al2007	1	Scientific article	Academia	https://doi.org/10.1205/psep07016	Chemicals	Fuels	not specified	0	0	1	0	1	Environmental	Toxicity	Terrestrial ecotoxicity (g C6H4CI2-eq)	1	ENV+ECO
2007	Narayanam et al	Narayanam et al2007	1	Scientific article	Academia	https://doi.org/10.1205/psep07016	Chemicals	Fuels	not specified	0	0	1	0	1	Environmental	Toxicity	Human toxicity potential (kg 1,4 DCB eq or CTUh)	1	ENV+ECO
2007	Narayanam et al	Narayanam et al2007	1	Scientific article	Academia	https://doi.org/10.1205/psep07016	Chemicals	Fuels	not specified	0	0	1	0	1	Environmental	Acidification	Terrestrial acidification (kg SO2eq)	1	ENV+ECO
2007	Narayanam et al	Narayanam et al2007	1	Scientific article	Academia	https://doi.org/10.1205/psep07016	Chemicals	Fuels	not specified	0	0	1	0	1	Environmental	Eutrophication	Freshwater eutrophication potential (kg P eq)	1	ENV+ECO
2007	Narayanam et al	Narayanam et al2007	1	Scientific article	Academia	https://doi.org/10.1205/psep07016	Chemicals	Fuels	not specified	0	0	1	0	1	Environmental	Stratospheric ozone Depletion	Ozone depletion potential (kg CFC-11)	1	ENV+ECO
2007	Narayanam et al	Narayanam et al2007	1	Scientific article	Academia	https://doi.org/10.1205/psep07016	Chemicals	Fuels	not specified	0	0	1	0	1	Environmental	Photochemical Ozone Formation	POCP (kg of ethene-eq or Kg NMVOC or kg O3)	1	ENV+ECO
2007	Narayanam et al	Narayanam et al2007	1	Scientific article	Academia	https://doi.org/10.1205/psep07016	Chemicals	Fuels	not specified	0	0	1	0	1	Economic	Profitability	Financial profit (€)	1	ENV+ECO
2007	Narayanam et al	Narayanam et al2007	1	Scientific article	Academia	https://doi.org/10.1205/psep07016	Chemicals	Fuels	not specified	0	0	1	0	1	Economic	Other	TCC (Total Capital Cost)	1	ENV+ECO
2007	Narayanam et al	Narayanam et al2007	1	Scientific article	Academia	https://doi.org/10.1205/psep07016	Chemicals	Fuels	not specified	0	0	1	0	1	Economic	Other	TPC (Total Production Cost)	1	ENV+ECO
2007	Narayanam et al	Narayanam et al2007	1	Scientific article	Academia	https://doi.org/10.1205/psep07016	Chemicals	Fuels	not specified	0	0	1	0	1	Economic	Other	Breakeven point	1	ENV+ECO
2007	Xu and Diwekar	Xu and Diwekar2007	0	Scientific article	Academia	https://doi.org/10.1504/IJEP.2007.012797	Chemicals	Solvents	not specified	0	0	1	0	1	Resources-, processing, and product- related	Circularity	Recycling efficiency/recovery rate (%)	1	SAF+ECO
2007	Xu and Diwekar	Xu and Diwekar2007	0	Scientific article	Academia	https://doi.org/10.1504/IJEP.2007.012797	Chemicals	Solvents	not specified	0	0	1	0	1	Resources-, processing, and product- related	Energy	Energy consumption (kWh or MJ)	1	SAF+ECO
2007	Xu and Diwekar	Xu and Diwekar2007	0	Scientific article	Academia	https://doi.org/10.1504/IJEP.2007.012797	Chemicals	Solvents	not specified	0	0	1	0	1	Economic	Internal cost	Purchase cost	1	SAF+ECO
2008	Alfonsi et al	Alfonsi et al2008	1	Scientific article	Industry	https://doi.org/10.1039/b711717e	Chemicals	Solvents	not specified	0	0	1	0	1	Resources-, processing, and product- related	Resources: types, quantity, and efficiency considerations	Atom economy (%)	1	SAF
2008	EU Green public procurement (COM 2008/400)	EU Green public procurement (COM 2008/400)2008	0	Regulation	EU legislations	https://eur-le1.europa.eu/Le1UriServ/Le1UriServ.do?uri=COM:2008:0400:FIN:EN:PDF	Products	not specified	not specified	1	0	0	0	1	Resources-, processing, and product- related	Energy	Energy efficiency (%)	1	SAF+ECO
2008	EU Green public procurement (COM 2008/400)	EU Green public procurement (COM 2008/400)2008	0	Regulation	EU legislations	https://eur-le1.europa.eu/Le1UriServ/Le1UriServ.do?uri=COM:2008:0400:FIN:EN:PDF	Products	not specified	not specified	1	0	0	0	1	Economic	Internal cost	Purchase cost	1	SAF+ECO
2008	Halim and Srinivasan	Halim and Srinivasan2008	1	Scientific article	Academia	https://doi.org/10.1016/j.cherd.2008.02.015	Chemicals	not specified	not specified	1	0	0	0	1	Environmental	Climate Change	GWP 100 (kg CO₂eq)	1	ENV
2008	Halim and Srinivasan	Halim and Srinivasan2008	1	Scientific article	Academia	https://doi.org/10.1016/j.cherd.2008.02.015	Chemicals	not specified	not specified	1	0	0	0	1	Environmental	Toxicity	Freshwater (eco)toxicity (CTUe)	1	ENV
2008	Halim and Srinivasan	Halim and Srinivasan2008	1	Scientific article	Academia	https://doi.org/10.1016/j.cherd.2008.02.015	Chemicals	not specified	not specified	1	0	0	0	1	Environmental	Toxicity	Terrestrial ecotoxicity (g C6H4CI2-eq)	1	ENV
2008	Halim and Srinivasan	Halim and Srinivasan2008	1	Scientific article	Academia	https://doi.org/10.1016/j.cherd.2008.02.015	Chemicals	not specified	not specified	1	0	0	0	1	Environmental	Toxicity	Human toxicity potential (kg 1,4 DCB eq or CTUh)	1	ENV
2008	Halim and Srinivasan	Halim and Srinivasan2008	1	Scientific article	Academia	https://doi.org/10.1016/j.cherd.2008.02.015	Chemicals	not specified	not specified	1	0	0	0	1	Environmental	Stratospheric ozone Depletion	Ozone depletion potential (kg CFC-11)	1	ENV
2008	Halim and Srinivasan	Halim and Srinivasan2008	1	Scientific article	Academia	https://doi.org/10.1016/j.cherd.2008.02.015	Chemicals	not specified	not specified	1	0	0	0	1	Environmental	Photochemical Ozone Formation	POCP (kg of ethene-eq or Kg NMVOC or kg O3)	1	ENV
2008	Reinhardt et al	Reinhardt et al2008	0	Scientific article	Academia	https://doi.org/10.1039/b807379a	Chemicals	Solvents	not specified	1	0	1	0	1	Resources-, processing, and product- related	Energy	Cumulative energy demand (MJ)	1	SAF+ECO
2008	Reinhardt et al	Reinhardt et al2008	0	Scientific article	Academia	https://doi.org/10.1039/b807379a	Chemicals	Solvents	not specified	1	0	1	0	1	Economic	External cost	Life cycle cost	1	SAF+ECO
2008	Sugiyama et al	Sugiyama et al2008	1	Scientific article	Academia	https://doi.org/10.1002/aic.11430	Chemicals	not specified	not specified	1	0	1	0	1	Resources-, processing, and product- related	Resources: types, quantity, and efficiency considerations	Net mass of materials consumed (kg)	1	SAF+ECO
2008	Sugiyama et al	Sugiyama et al2008	1	Scientific article	Academia	https://doi.org/10.1002/aic.11430	Chemicals	not specified	not specified	1	0	1	0	1	Resources-, processing, and product- related	Energy	Energy efficiency (%)	1	SAF+ECO
2008	Sugiyama et al	Sugiyama et al2008	1	Scientific article	Academia	https://doi.org/10.1002/aic.11430	Chemicals	not specified	not specified	1	0	1	0	1	Resources-, processing, and product- related	Energy	Cumulative energy demand (MJ)	1	SAF+ECO
2008	Sugiyama et al	Sugiyama et al2008	1	Scientific article	Academia	https://doi.org/10.1002/aic.11430	Chemicals	not specified	not specified	1	0	1	0	1	Economic	Profitability	Net present value (€)	1	SAF+ECO
2008	Sugiyama et al	Sugiyama et al2008	1	Scientific article	Academia	https://doi.org/10.1002/aic.11430	Chemicals	not specified	not specified	1	0	1	0	1	Economic	Internal cost	Purchase cost	1	SAF+ECO
2008	Sugiyama et al	Sugiyama et al2008	1	Scientific article	Academia	https://doi.org/10.1002/aic.11430	Chemicals	not specified	not specified	1	0	1	0	1	Economic	Internal cost	(Total) production cost (€)	1	SAF+ECO
2009	Andraos	Andraos2009	0	Scientific article	Academia	https://doi.org/10.1021/op800157z	Chemicals	Drug	Pharmaceutical	0	0	1	0	1	Resources-, processing, and product- related	Resources: types, quantity, and efficiency considerations	Net mass of materials consumed (kg)	1	SAF+ECO
2009	Andraos	Andraos2009	0	Scientific article	Academia	https://doi.org/10.1021/op800157z	Chemicals	Drug	Pharmaceutical	0	0	1	0	1	Resources-, processing, and product- related	Resources: types, quantity, and efficiency considerations	Amount of (solid/water) waste (kg or %)	1	SAF+ECO
2009	Andraos	Andraos2009	0	Scientific article	Academia	https://doi.org/10.1021/op800157z	Chemicals	Drug	Pharmaceutical	0	0	1	0	1	Resources-, processing, and product- related	Resources: types, quantity, and efficiency considerations	Reaction efficiency (%)	1	SAF+ECO
2009	Andraos	Andraos2009	0	Scientific article	Academia	https://doi.org/10.1021/op800157z	Chemicals	Drug	Pharmaceutical	0	0	1	0	1	Resources-, processing, and product- related	Resources: types, quantity, and efficiency considerations	Atom economy (%)	1	SAF+ECO
2009	Andraos	Andraos2009	0	Scientific article	Academia	https://doi.org/10.1021/op800157z	Chemicals	Drug	Pharmaceutical	0	0	1	0	1	Resources-, processing, and product- related	Resources: types, quantity, and efficiency considerations	E-factor (%)	1	SAF+ECO
2009	Andraos	Andraos2009	0	Scientific article	Academia	https://doi.org/10.1021/op800157z	Chemicals	Drug	Pharmaceutical	0	0	1	0	1	Resources-, processing, and product- related	Circularity	Recycling efficiency/recovery rate (%)	1	SAF+ECO
2009	Andraos	Andraos2009	0	Scientific article	Academia	https://doi.org/10.1021/op800157z	Chemicals	Drug	Pharmaceutical	0	0	1	0	1	Economic	Internal cost	Product cost	1	SAF+ECO
2009	Dinh et al	Dinh et al2009	0	Scientific article	Academia	DOI 10.1002/ep.10335	Chemicals	Fuels	not specified	1	0	1	0	1	Environmental	Climate Change	GWP 100 (kg CO₂eq)	1	ENV+SAF
2009	Dinh et al	Dinh et al2009	0	Scientific article	Academia	DOI 10.1002/ep.10335	Chemicals	Fuels	not specified	1	0	1	0	1	Environmental	Resources	Land Usage (M ha)	1	ENV+SAF
2009	Dinh et al	Dinh et al2009	0	Scientific article	Academia	DOI 10.1002/ep.10335	Chemicals	Fuels	not specified	1	0	1	0	1	Resources-, processing, and product- related	Resources: types, quantity, and efficiency considerations	Water consumption (m3)	1	ENV+SAF
2009	Ecodesign Directive (Directive 2009/125/EC)	Ecodesign Directive (Directive 2009/125/EC)2009	0	Regulation	EU legislations	https://eur-le1.europa.eu/Le1UriServ/Le1UriServ.do?uri=OJ:L:2009:285:0010:0035:en:PDF	Products	Energy	not specified	0	0	0	0	1	Resources-, processing, and product- related	Resources: types, quantity, and efficiency considerations	Water consumption (m3)	1	SAF
2009	Ecodesign Directive (Directive 2009/125/EC)	Ecodesign Directive (Directive 2009/125/EC)2009	0	Regulation	EU legislations	https://eur-le1.europa.eu/Le1UriServ/Le1UriServ.do?uri=OJ:L:2009:285:0010:0035:en:PDF	Products	Energy	not specified	0	0	0	0	1	Resources-, processing, and product- related	Circularity	Recyclabile? (yes/no)	1	SAF
2009	Ecodesign Directive (Directive 2009/125/EC)	Ecodesign Directive (Directive 2009/125/EC)2009	0	Regulation	EU legislations	https://eur-le1.europa.eu/Le1UriServ/Le1UriServ.do?uri=OJ:L:2009:285:0010:0035:en:PDF	Products	Energy	not specified	0	0	0	0	1	Resources-, processing, and product- related	Circularity	Disassembly/reparability design (conceptual)	1	SAF
2009	Ecodesign Directive (Directive 2009/125/EC)	Ecodesign Directive (Directive 2009/125/EC)2009	0	Regulation	EU legislations	https://eur-le1.europa.eu/Le1UriServ/Le1UriServ.do?uri=OJ:L:2009:285:0010:0035:en:PDF	Products	Energy	not specified	0	0	0	0	1	Resources-, processing, and product- related	Energy	Energy consumption (kWh or MJ)	1	SAF
2010	Energy Label Directive (2010/30/EU – revised EU 2017/1369)	Energy Label Directive (2010/30/EU – revised EU 2017/1369)2010	0	Regulation	EU legislations	https://eur-le1.europa.eu/legal-content/EN/T1T/?uri=uriserv%3AOJ.L_.2017.198.01.0001.01.ENG	Products	Energy	not specified	0	0	0	0	1	Environmental	Climate Change	Climate change (conceptual)	1	ENV+SAF
2010	Energy Label Directive (2010/30/EU – revised EU 2017/1369)	Energy Label Directive (2010/30/EU – revised EU 2017/1369)2010	0	Regulation	EU legislations	https://eur-le1.europa.eu/legal-content/EN/T1T/?uri=uriserv%3AOJ.L_.2017.198.01.0001.01.ENG	Products	Energy	not specified	0	0	0	0	1	Resources-, processing, and product- related	Resources: types, quantity, and efficiency considerations	Water consumption (m3)	1	ENV+SAF
2010	Energy Label Directive (2010/30/EU – revised EU 2017/1369)	Energy Label Directive (2010/30/EU – revised EU 2017/1369)2010	0	Regulation	EU legislations	https://eur-le1.europa.eu/legal-content/EN/T1T/?uri=uriserv%3AOJ.L_.2017.198.01.0001.01.ENG	Products	Energy	not specified	0	0	0	0	1	Resources-, processing, and product- related	Energy	Energy consumption (kWh or MJ)	1	ENV+SAF
2010	Energy Label Directive (2010/30/EU – revised EU 2017/1369)	Energy Label Directive (2010/30/EU – revised EU 2017/1369)2010	0	Regulation	EU legislations	https://eur-le1.europa.eu/legal-content/EN/T1T/?uri=uriserv%3AOJ.L_.2017.198.01.0001.01.ENG	Products	Energy	not specified	0	0	0	0	1	Resources-, processing, and product- related	Energy	Energy efficiency (%)	1	ENV+SAF
2010	EU Ecolabel (EU 2010/66)	EU Ecolabel (EU 2010/66)2010	0	Regulation	EU legislations	http://data.europa.eu/eli/reg/2010/66/2017-11-14	Products	not specified	not specified	0	0	0	0	1	Environmental	Climate Change	GWP 100 (kg CO₂eq)	1	ENV+SAF+SOC
2010	EU Ecolabel (EU 2010/66)	EU Ecolabel (EU 2010/66)2010	0	Regulation	EU legislations	http://data.europa.eu/eli/reg/2010/66/2017-11-14	Products	not specified	not specified	0	0	0	0	1	Resources-, processing, and product- related	Resources: types, quantity, and efficiency considerations	Use of critical raw materials? (yes/no)	1	ENV+SAF+SOC
2010	EU Ecolabel (EU 2010/66)	EU Ecolabel (EU 2010/66)2010	0	Regulation	EU legislations	http://data.europa.eu/eli/reg/2010/66/2017-11-14	Products	not specified	not specified	0	0	0	0	1	Resources-, processing, and product- related	Circularity	Recyclabile? (yes/no)	1	ENV+SAF+SOC
2010	EU Ecolabel (EU 2010/66)	EU Ecolabel (EU 2010/66)2010	0	Regulation	EU legislations	http://data.europa.eu/eli/reg/2010/66/2017-11-14	Products	not specified	not specified	0	0	0	0	1	Resources-, processing, and product- related	Circularity	Disassembly/reparability design (conceptual)	1	ENV+SAF+SOC
2010	EU Ecolabel (EU 2010/66)	EU Ecolabel (EU 2010/66)2010	0	Regulation	EU legislations	http://data.europa.eu/eli/reg/2010/66/2017-11-14	Products	not specified	not specified	0	0	0	0	1	Resources-, processing, and product- related	Circularity	Durability (years)	1	ENV+SAF+SOC
2010	EU Ecolabel (EU 2010/66)	EU Ecolabel (EU 2010/66)2010	0	Regulation	EU legislations	http://data.europa.eu/eli/reg/2010/66/2017-11-14	Products	not specified	not specified	0	0	0	0	1	Resources-, processing, and product- related	Biodegradability	Biodegradability requirement (EU law specification)	1	ENV+SAF+SOC
2010	EU Ecolabel (EU 2010/66)	EU Ecolabel (EU 2010/66)2010	0	Regulation	EU legislations	http://data.europa.eu/eli/reg/2010/66/2017-11-14	Products	not specified	not specified	0	0	0	0	1	Social	workers	Respect for the national standards for security and social responsibility	1	ENV+SAF+SOC
2010	EU Ecolabel (EU 2010/66)	EU Ecolabel (EU 2010/66)2010	0	Regulation	EU legislations	http://data.europa.eu/eli/reg/2010/66/2017-11-14	Products	not specified	not specified	0	0	0	0	1	Social	local community	Human rights (conceptual)	1	ENV+SAF+SOC
2011	Brignon	Brignon2011	0	Scientific article	Academia	https://doi.org/10.1088/1742-6596/304/1/012069	Materials	Nanomaterials	not specified	1	0	0	0	1	Economic	External cost	Externality cost (€)	1	ECO
2011	GRS	GRS2011	0	Certification	Certification schemes	https://certifications.controlunion.com/en/certification-programs/certification-programs/grs-global-recycle-standard	Materials	Textiles	not specified	0	0	0	0	1	Resources-, processing, and product- related	Resources: types, quantity, and efficiency considerations	Water consumption (m3)	1	SAF+SOC
2011	GRS	GRS2011	0	Certification	Certification schemes	https://certifications.controlunion.com/en/certification-programs/certification-programs/grs-global-recycle-standard	Materials	Textiles	not specified	0	0	0	0	1	Resources-, processing, and product- related	Circularity	Recycled content (%)	1	SAF+SOC
2011	GRS	GRS2011	0	Certification	Certification schemes	https://certifications.controlunion.com/en/certification-programs/certification-programs/grs-global-recycle-standard	Materials	Textiles	not specified	0	0	0	0	1	Resources-, processing, and product- related	Energy	Energy consumption (kWh or MJ)	1	SAF+SOC
2011	GRS	GRS2011	0	Certification	Certification schemes	https://certifications.controlunion.com/en/certification-programs/certification-programs/grs-global-recycle-standard	Materials	Textiles	not specified	0	0	0	0	1	Social	workers	Workers health & safety	1	SAF+SOC
2011	GRS	GRS2011	0	Certification	Certification schemes	https://certifications.controlunion.com/en/certification-programs/certification-programs/grs-global-recycle-standard	Materials	Textiles	not specified	0	0	0	0	1	Social	workers	Equal opportunities and discrimination	1	SAF+SOC
2011	GRS	GRS2011	0	Certification	Certification schemes	https://certifications.controlunion.com/en/certification-programs/certification-programs/grs-global-recycle-standard	Materials	Textiles	not specified	0	0	0	0	1	Social	workers	Child labour	1	SAF+SOC
2011	GRS	GRS2011	0	Certification	Certification schemes	https://certifications.controlunion.com/en/certification-programs/certification-programs/grs-global-recycle-standard	Materials	Textiles	not specified	0	0	0	0	1	Social	workers	Forced labour	1	SAF+SOC
2011	GRS	GRS2011	0	Certification	Certification schemes	https://certifications.controlunion.com/en/certification-programs/certification-programs/grs-global-recycle-standard	Materials	Textiles	not specified	0	0	0	0	1	Social	workers	Sexual harassment	1	SAF+SOC
2011	GRS	GRS2011	0	Certification	Certification schemes	https://certifications.controlunion.com/en/certification-programs/certification-programs/grs-global-recycle-standard	Materials	Textiles	not specified	0	0	0	0	1	Social	workers	Freedom of association and collective bargaining	1	SAF+SOC
2011	GRS	GRS2011	0	Certification	Certification schemes	https://certifications.controlunion.com/en/certification-programs/certification-programs/grs-global-recycle-standard	Materials	Textiles	not specified	0	0	0	0	1	Social	workers	Fair salary	1	SAF+SOC
2011	GRS	GRS2011	0	Certification	Certification schemes	https://certifications.controlunion.com/en/certification-programs/certification-programs/grs-global-recycle-standard	Materials	Textiles	not specified	0	0	0	0	1	Social	workers	Working hours (e.g. maximum)/work-file balance	1	SAF+SOC
2011	Henderson et al	Henderson et al2011	1	Scientific article	Industry	https://pubs.rsc.org/en/content/articlelanding/2011/gc/c0gc00918k	Chemicals	Solvents	Pharmaceutical	1	0	1	0	1	Environmental	Climate Change	GWP 100 (kg CO₂eq)	1	ENV+SAF
2011	Henderson et al	Henderson et al2011	1	Scientific article	Industry	https://pubs.rsc.org/en/content/articlelanding/2011/gc/c0gc00918k	Chemicals	Solvents	Pharmaceutical	1	0	1	0	1	Environmental	Acidification	Terrestrial acidification (kg SO2eq)	1	ENV+SAF
2011	Henderson et al	Henderson et al2011	1	Scientific article	Industry	https://pubs.rsc.org/en/content/articlelanding/2011/gc/c0gc00918k	Chemicals	Solvents	Pharmaceutical	1	0	1	0	1	Environmental	Eutrophication	Eutrophication potential (kg of phosphate )	1	ENV+SAF
2011	Henderson et al	Henderson et al2011	1	Scientific article	Industry	https://pubs.rsc.org/en/content/articlelanding/2011/gc/c0gc00918k	Chemicals	Solvents	Pharmaceutical	1	0	1	0	1	Environmental	Photochemical Ozone Formation	POCP (kg of ethene-eq or Kg NMVOC or kg O3)	1	ENV+SAF
2011	Henderson et al	Henderson et al2011	1	Scientific article	Industry	https://pubs.rsc.org/en/content/articlelanding/2011/gc/c0gc00918k	Chemicals	Solvents	Pharmaceutical	1	0	1	0	1	Environmental	Water emission	Total organic carbon (kg)	1	ENV+SAF
2011	Henderson et al	Henderson et al2011	1	Scientific article	Industry	https://pubs.rsc.org/en/content/articlelanding/2011/gc/c0gc00918k	Chemicals	Solvents	Pharmaceutical	1	0	1	0	1	Resources-, processing, and product- related	Resources: types, quantity, and efficiency considerations	Renewable or fossil? (yes/no)	1	ENV+SAF
2011	Henderson et al	Henderson et al2011	1	Scientific article	Industry	https://pubs.rsc.org/en/content/articlelanding/2011/gc/c0gc00918k	Chemicals	Solvents	Pharmaceutical	1	0	1	0	1	Resources-, processing, and product- related	Resources: types, quantity, and efficiency considerations	Water consumption (m3)	1	ENV+SAF
2011	Henderson et al	Henderson et al2011	1	Scientific article	Industry	https://pubs.rsc.org/en/content/articlelanding/2011/gc/c0gc00918k	Chemicals	Solvents	Pharmaceutical	1	0	1	0	1	Resources-, processing, and product- related	Resources: types, quantity, and efficiency considerations	Net mass of materials consumed (kg)	1	ENV+SAF
2011	Henderson et al	Henderson et al2011	1	Scientific article	Industry	https://pubs.rsc.org/en/content/articlelanding/2011/gc/c0gc00918k	Chemicals	Solvents	Pharmaceutical	1	0	1	0	1	Resources-, processing, and product- related	Circularity	Boiling temperature (°C)	1	ENV+SAF
2011	Henderson et al	Henderson et al2011	1	Scientific article	Industry	https://pubs.rsc.org/en/content/articlelanding/2011/gc/c0gc00918k	Chemicals	Solvents	Pharmaceutical	1	0	1	0	1	Resources-, processing, and product- related	Circularity	Energy requirement for recycling (MJ/kg)	1	ENV+SAF
2011	Henderson et al	Henderson et al2011	1	Scientific article	Industry	https://pubs.rsc.org/en/content/articlelanding/2011/gc/c0gc00918k	Chemicals	Solvents	Pharmaceutical	1	0	1	0	1	Resources-, processing, and product- related	Energy	Energy consumption (kWh or MJ)	1	ENV+SAF
2011	Li et al	Li et al2011	1	Scientific article	Academia	https://pubs.acs.org/doi/pdf/10.1021/ie101660q	Chemicals	Fuels		1	0	1	0	1	Resources-, processing, and product- related	Resources: types, quantity, and efficiency considerations	Waste Reduction Algorithm	1	SAF+ECO
2011	Li et al	Li et al2011	1	Scientific article	Academia	https://pubs.acs.org/doi/pdf/10.1021/ie101660q	Chemicals	Fuels		1	0	1	0	1	Resources-, processing, and product- related	Energy	Energy efficiency (%)	1	SAF+ECO
2011	Li et al	Li et al2011	1	Scientific article	Academia	https://pubs.acs.org/doi/pdf/10.1021/ie101660q	Chemicals	Fuels		1	0	1	0	1	Economic	Profitability	Profitability (conceptual)	1	SAF+ECO
2012	Cervera-Padrell et al	Cervera-Padrell et al2012	0	Scientific article	Academia	https://doi.org/10.1016/j.ejpb.2012.07.001	Chemicals	Solvents	Pharmaceutical	1	0	0	0	1	Resources-, processing, and product- related	Resources: types, quantity, and efficiency considerations	Material intensity index (%)	1	SAF+ECO
2012	Cervera-Padrell et al	Cervera-Padrell et al2012	0	Scientific article	Academia	https://doi.org/10.1016/j.ejpb.2012.07.001	Chemicals	Solvents	Pharmaceutical	1	0	0	0	1	Economic	Internal cost	(Total) production cost (€)	1	SAF+ECO
2012	Cervera-Padrell et al	Cervera-Padrell et al2012	0	Scientific article	Academia	https://doi.org/10.1016/j.ejpb.2012.07.001	Chemicals	Solvents	Pharmaceutical	1	0	0	0	1	Economic	Other	Non-construction cost (tax, finantial cost)	1	SAF+ECO
2012	MTS	MTS 2012	0	Certification	Certification schemes	http://mts.sustainableproducts.com/SMaRT_product_standard.html	Products	not specified		1	0	0	0	1	Environmental	Climate Change	GWP 100 (kg CO₂eq)	1	ENV+SAF
2012	MTS	MTS 2012	0	Certification	Certification schemes	http://mts.sustainableproducts.com/SMaRT_product_standard.html	Products	not specified		1	0	0	0	1	Environmental	Toxicity	Ecotoxicity (not specified)	1	ENV+SAF
2012	MTS	MTS 2012	0	Certification	Certification schemes	http://mts.sustainableproducts.com/SMaRT_product_standard.html	Products	not specified		1	0	0	0	1	Environmental	Toxicity	Human toxicity potential (kg 1,4 DCB eq or CTUh)	1	ENV+SAF
2012	MTS	MTS 2012	0	Certification	Certification schemes	http://mts.sustainableproducts.com/SMaRT_product_standard.html	Products	not specified		1	0	0	0	1	Environmental	Acidification	Acidification potential (molc H+ eq)	1	ENV+SAF
2012	MTS	MTS 2012	0	Certification	Certification schemes	http://mts.sustainableproducts.com/SMaRT_product_standard.html	Products	not specified		1	0	0	0	1	Environmental	Eutrophication	Eutrophication potential (kg of phosphate )	1	ENV+SAF
2012	MTS	MTS 2012	0	Certification	Certification schemes	http://mts.sustainableproducts.com/SMaRT_product_standard.html	Products	not specified		1	0	0	0	1	Environmental	Stratospheric ozone Depletion	Ozone depletion potential (kg CFC-11)	1	ENV+SAF
2012	MTS	MTS 2012	0	Certification	Certification schemes	http://mts.sustainableproducts.com/SMaRT_product_standard.html	Products	not specified		1	0	0	0	1	Environmental	Particulate Matter	Particulate matter (PM 2.5eq)	1	ENV+SAF
2012	MTS	MTS 2012	0	Certification	Certification schemes	http://mts.sustainableproducts.com/SMaRT_product_standard.html	Products	not specified		1	0	0	0	1	Environmental	Photochemical Ozone Formation	POCP (kg of ethene-eq or Kg NMVOC or kg O3)	1	ENV+SAF
2012	MTS	MTS 2012	0	Certification	Certification schemes	http://mts.sustainableproducts.com/SMaRT_product_standard.html	Products	not specified		1	0	0	0	1	Environmental	Resources	Land use (not specified)	1	ENV+SAF
2012	MTS	MTS 2012	0	Certification	Certification schemes	http://mts.sustainableproducts.com/SMaRT_product_standard.html	Products	not specified		1	0	0	0	1	Environmental	Resources	Resource use/depletion - fossil (MJ)	1	ENV+SAF
2012	MTS	MTS 2012	0	Certification	Certification schemes	http://mts.sustainableproducts.com/SMaRT_product_standard.html	Products	not specified		1	0	0	0	1	Environmental	Air emission	Atmospheric SO2 emissions (g)	1	ENV+SAF
2012	MTS	MTS 2012	0	Certification	Certification schemes	http://mts.sustainableproducts.com/SMaRT_product_standard.html	Products	not specified		1	0	0	0	1	Environmental	Air emission	Atmospheric NOx emissions (g)	1	ENV+SAF
2012	MTS	MTS 2012	0	Certification	Certification schemes	http://mts.sustainableproducts.com/SMaRT_product_standard.html	Products	not specified		1	0	0	0	1	Resources-, processing, and product- related	Resources: types, quantity, and efficiency considerations	Renewable or fossil? (yes/no)	1	ENV+SAF
2012	MTS	MTS 2012	0	Certification	Certification schemes	http://mts.sustainableproducts.com/SMaRT_product_standard.html	Products	not specified		1	0	0	0	1	Resources-, processing, and product- related	Resources: types, quantity, and efficiency considerations	Water consumption (m3)	1	ENV+SAF
2012	MTS	MTS 2012	0	Certification	Certification schemes	http://mts.sustainableproducts.com/SMaRT_product_standard.html	Products	not specified		1	0	0	0	1	Resources-, processing, and product- related	Resources: types, quantity, and efficiency considerations	Waste characterisation potential (kg)	1	ENV+SAF
2012	Rossi	Rossi2012	0	Guidance	NGOs	https://www.bizngo.org/alternatives-assessment/chemical-alternatives-assessment-protocol#:~:te1t=The%20BizNGO%20Chemical%20Alternatives%20Assessment,the%20environment%20with%20safer%20alternatives.	Chemicals	not specified		1	0	1	0	1	Environmental	Climate Change	GWP 100 (kg CO₂eq)	1	ENV+ECO
2012	Rossi	Rossi2012	0	Guidance	NGOs	https://www.bizngo.org/alternatives-assessment/chemical-alternatives-assessment-protocol#:~:te1t=The%20BizNGO%20Chemical%20Alternatives%20Assessment,the%20environment%20with%20safer%20alternatives.	Chemicals	not specified		1	0	1	0	1	Economic	Profitability	Profitability (conceptual)	1	ENV+ECO
2012	Rossi	Rossi2012	0	Guidance	NGOs	https://www.bizngo.org/alternatives-assessment/chemical-alternatives-assessment-protocol#:~:te1t=The%20BizNGO%20Chemical%20Alternatives%20Assessment,the%20environment%20with%20safer%20alternatives.	Chemicals	not specified		1	0	1	0	1	Economic	External cost	Life cycle cost	1	ENV+ECO
2013	Malloy et al	Malloy et al2013	1	Scientific article	Academia	DOI: 10.1002/ieam.1449	Materials	Building materials	Construction	1	0	1	1	1	Environmental	Climate Change	GWP 100 (kg CO₂eq)	1	ENV+SAF+ECO
2013	Malloy et al	Malloy et al2013	1	Scientific article	Academia	DOI: 10.1002/ieam.1449	Materials	Building materials	Construction	1	0	1	1	1	Environmental	Stratospheric ozone Depletion	Ozone depletion potential (kg CFC-11)	1	ENV+SAF+ECO
2013	Malloy et al	Malloy et al2013	1	Scientific article	Academia	DOI: 10.1002/ieam.1449	Materials	Building materials	Construction	1	0	1	1	1	Environmental	Particulate Matter	Particulate matter (PM 2.5eq)	1	ENV+SAF+ECO
2013	Malloy et al	Malloy et al2013	1	Scientific article	Academia	DOI: 10.1002/ieam.1449	Materials	Building materials	Construction	1	0	1	1	1	Environmental	Photochemical Ozone Formation	POCP (kg of ethene-eq or Kg NMVOC or kg O3)	1	ENV+SAF+ECO
2013	Malloy et al	Malloy et al2013	1	Scientific article	Academia	DOI: 10.1002/ieam.1449	Materials	Building materials	Construction	1	0	1	1	1	Environmental	Resources	Resource use/depletion - fossil (MJ)	1	ENV+SAF+ECO
2013	Malloy et al	Malloy et al2013	1	Scientific article	Academia	DOI: 10.1002/ieam.1449	Materials	Building materials	Construction	1	0	1	1	1	Environmental	Air emission	Fine particulate matter (mg PM 2.5)	1	ENV+SAF+ECO
2013	Malloy et al	Malloy et al2013	1	Scientific article	Academia	DOI: 10.1002/ieam.1449	Materials	Building materials	Construction	1	0	1	1	1	Environmental	Air emission	Atmospheric SO2 emissions (g)	1	ENV+SAF+ECO
2013	Malloy et al	Malloy et al2013	1	Scientific article	Academia	DOI: 10.1002/ieam.1449	Materials	Building materials	Construction	1	0	1	1	1	Environmental	Air emission	Atmospheric NOx emissions (g)	1	ENV+SAF+ECO
2013	Malloy et al	Malloy et al2013	1	Scientific article	Academia	DOI: 10.1002/ieam.1449	Materials	Building materials	Construction	1	0	1	1	1	Resources-, processing, and product- related	Resources: types, quantity, and efficiency considerations	Renewable or fossil? (yes/no)	1	ENV+SAF+ECO
2013	Malloy et al	Malloy et al2013	1	Scientific article	Academia	DOI: 10.1002/ieam.1449	Materials	Building materials	Construction	1	0	1	1	1	Resources-, processing, and product- related	Resources: types, quantity, and efficiency considerations	Water consumption (m3)	1	ENV+SAF+ECO
2013	Malloy et al	Malloy et al2013	1	Scientific article	Academia	DOI: 10.1002/ieam.1449	Materials	Building materials	Construction	1	0	1	1	1	Resources-, processing, and product- related	Circularity	Recyclabile? (yes/no)	1	ENV+SAF+ECO
2013	Malloy et al	Malloy et al2013	1	Scientific article	Academia	DOI: 10.1002/ieam.1449	Materials	Building materials	Construction	1	0	1	1	1	Resources-, processing, and product- related	Energy	Cumulative energy demand (MJ)	1	ENV+SAF+ECO
2013	Malloy et al	Malloy et al2013	1	Scientific article	Academia	DOI: 10.1002/ieam.1449	Materials	Building materials	Construction	1	0	1	1	1	Economic	Internal cost	Purchase cost	1	ENV+SAF+ECO
2013	Malloy et al	Malloy et al2013	1	Scientific article	Academia	DOI: 10.1002/ieam.1449	Materials	Building materials	Construction	1	0	1	1	1	Economic	Internal cost	(Total) production cost (€)	1	ENV+SAF+ECO
2013	Patel et al	Patel et al2013	1	Scientific article	Academia	http://doi.org/10.1002/cssc.201300168	Chemicals	not specified	not specified	1	0	0	0	1	Environmental	Climate Change	GWP 100 (kg CO₂eq)	1	ENV+SAF+ECO
2013	Patel et al	Patel et al2013	1	Scientific article	Academia	http://doi.org/10.1002/cssc.201300168	Chemicals	not specified	not specified	1	0	0	0	1	Resources-, processing, and product- related	Energy	Cumulative energy demand (MJ)	1	ENV+SAF+ECO
2013	Patel et al	Patel et al2013	1	Scientific article	Academia	http://doi.org/10.1002/cssc.201300168	Chemicals	not specified	not specified	1	0	0	0	1	Economic	Internal cost	(Total) production cost (€)	1	ENV+SAF+ECO
2013	Posada et al	Posada et al2013	1	Scientific article	Academia	https://doi.org/10.1016/j.biortech.2012.09.058	Chemicals	Fuels	not specified	1	0	1	1	1	Environmental	Climate Change	GWP 100 (kg CO₂eq)	1	ENV+SAF+ECO
2013	Posada et al	Posada et al2013	1	Scientific article	Academia	https://doi.org/10.1016/j.biortech.2012.09.058	Chemicals	Fuels	not specified	1	0	1	1	1	Resources-, processing, and product- related	Energy	Cumulative energy demand (MJ)	1	ENV+SAF+ECO
2013	Posada et al	Posada et al2013	1	Scientific article	Academia	https://doi.org/10.1016/j.biortech.2012.09.058	Chemicals	Fuels	not specified	1	0	1	1	1	Economic	Internal cost	Purchase cost	1	ENV+SAF+ECO
2013	Prat et al	Prat et al2013	1	Scientific article	Industry	https://doi.org/10.1021/op4002565	Chemicals	Solvents	not specified	0	0	1	0	1	Resources-, processing, and product- related	Circularity	Recyclabile? (yes/no)	1	SAF
2014	Aktar et al	Aktar et al2014	0	Scientific article	Academia	https://link.springer.com/article/10.1007/s10098-014-0849-x	Materials	Building materials	Construction	1	1	1	1	0	Environmental	Climate Change	GWP 100 (kg CO₂eq)	1	ENV+SAF+ECO
2014	Aktar et al	Aktar et al2014	0	Scientific article	Academia	https://link.springer.com/article/10.1007/s10098-014-0849-x	Materials	Building materials	Construction	1	1	1	1	0	Environmental	Acidification	Terrestrial acidification (kg SO2eq)	1	ENV+SAF+ECO
2014	Aktar et al	Aktar et al2014	0	Scientific article	Academia	https://link.springer.com/article/10.1007/s10098-014-0849-x	Materials	Building materials	Construction	1	1	1	1	0	Environmental	Resources	Resource use/depletion - fossil (MJ)	1	ENV+SAF+ECO
2014	Aktar et al	Aktar et al2014	0	Scientific article	Academia	https://link.springer.com/article/10.1007/s10098-014-0849-x	Materials	Building materials	Construction	1	1	1	1	0	Environmental	Toxicity	smog potential (Kg Nox eq)	1	ENV+SAF+ECO
2014	Aktar et al	Aktar et al2014	0	Scientific article	Academia	https://link.springer.com/article/10.1007/s10098-014-0849-x	Materials	Building materials	Construction	1	1	1	1	0	Resources-, processing, and product- related	Energy	Energy consumption (kWh or MJ)	1	ENV+SAF+ECO
2014	Aktar et al	Aktar et al2014	0	Scientific article	Academia	https://link.springer.com/article/10.1007/s10098-014-0849-x	Materials	Building materials	Construction	1	1	1	1	0	Economic	External cost	Life cycle cost	1	ENV+SAF+ECO
2014	NRC	NRC 2014	0	Guidance	Government agencies	https://www.nap.edu/catalog/18872/a-framework-to-guide-selection-of-chemical-alternatives	Chemicals	not specified	not specified	1	0	0	0	1	Environmental	Climate Change	GWP 100 (kg CO₂eq)	1	ENV+SOC
2014	NRC	NRC 2014	0	Guidance	Government agencies	https://www.nap.edu/catalog/18872/a-framework-to-guide-selection-of-chemical-alternatives	Chemicals	not specified	not specified	1	0	0	0	1	Environmental	Toxicity	Freshwater (eco)toxicity (CTUe)	1	ENV+SOC
2014	NRC	NRC 2014	0	Guidance	Government agencies	https://www.nap.edu/catalog/18872/a-framework-to-guide-selection-of-chemical-alternatives	Chemicals	not specified	not specified	1	0	0	0	1	Environmental	Toxicity	Terrestrial ecotoxicity (g C6H4CI2-eq)	1	ENV+SOC
2014	NRC	NRC 2014	0	Guidance	Government agencies	https://www.nap.edu/catalog/18872/a-framework-to-guide-selection-of-chemical-alternatives	Chemicals	not specified	not specified	1	0	0	0	1	Environmental	Acidification	Acidification potential (molc H+ eq)	1	ENV+SOC
2014	NRC	NRC 2014	0	Guidance	Government agencies	https://www.nap.edu/catalog/18872/a-framework-to-guide-selection-of-chemical-alternatives	Chemicals	not specified	not specified	1	0	0	0	1	Environmental	Photochemical Ozone Formation	POCP (kg of ethene-eq or Kg NMVOC or kg O3)	1	ENV+SOC
2014	NRC	NRC 2014	0	Guidance	Government agencies	https://www.nap.edu/catalog/18872/a-framework-to-guide-selection-of-chemical-alternatives	Chemicals	not specified	not specified	1	0	0	0	1	Environmental	Resources	Water depletion potential (m3eq)	1	ENV+SOC
2014	NRC	NRC 2014	0	Guidance	Government agencies	https://www.nap.edu/catalog/18872/a-framework-to-guide-selection-of-chemical-alternatives	Chemicals	not specified	not specified	1	0	0	0	1	Environmental	Resources	Land use (not specified)	1	ENV+SOC
2014	NRC	NRC 2014	0	Guidance	Government agencies	https://www.nap.edu/catalog/18872/a-framework-to-guide-selection-of-chemical-alternatives	Chemicals	not specified	not specified	1	0	0	0	1	Environmental	Resources	Resource depletion potential (kg Sb eq)	1	ENV+SOC
2014	NRC	NRC 2014	0	Guidance	Government agencies	https://www.nap.edu/catalog/18872/a-framework-to-guide-selection-of-chemical-alternatives	Chemicals	not specified	not specified	1	0	0	0	1	Environmental	Integrated Assessment	Biodiversity protection (conceptual)	1	ENV+SOC
2014	NRC	NRC 2014	0	Guidance	Government agencies	https://www.nap.edu/catalog/18872/a-framework-to-guide-selection-of-chemical-alternatives	Chemicals	not specified	not specified	1	0	0	0	1	Environmental	Integrated Assessment	Human Health (DALY)	1	ENV+SOC
2014	NRC	NRC 2014	0	Guidance	Government agencies	https://www.nap.edu/catalog/18872/a-framework-to-guide-selection-of-chemical-alternatives	Chemicals	not specified	not specified	1	0	0	0	1	Social	society	Corruption prevention initiatives	1	ENV+SOC
2014	NRC	NRC 2014	0	Guidance	Government agencies	https://www.nap.edu/catalog/18872/a-framework-to-guide-selection-of-chemical-alternatives	Chemicals	not specified	not specified	1	0	0	0	1	Social	consumer	Ethics in marketing communication	1	ENV+SOC
2014	NRC	NRC 2014	0	Guidance	Government agencies	https://www.nap.edu/catalog/18872/a-framework-to-guide-selection-of-chemical-alternatives	Chemicals	not specified	not specified	1	0	0	0	1	Social	workers	Rate of injuries	1	ENV+SOC
2014	NRC	NRC 2014	0	Guidance	Government agencies	https://www.nap.edu/catalog/18872/a-framework-to-guide-selection-of-chemical-alternatives	Chemicals	not specified	not specified	1	0	0	0	1	Social	workers	Equal opportunities and discrimination	1	ENV+SOC
2014	NRC	NRC 2014	0	Guidance	Government agencies	https://www.nap.edu/catalog/18872/a-framework-to-guide-selection-of-chemical-alternatives	Chemicals	not specified	not specified	1	0	0	0	1	Social	workers	Age	1	ENV+SOC
2014	NRC	NRC 2014	0	Guidance	Government agencies	https://www.nap.edu/catalog/18872/a-framework-to-guide-selection-of-chemical-alternatives	Chemicals	not specified	not specified	1	0	0	0	1	Social	workers	Disability	1	ENV+SOC
2014	NRC	NRC 2014	0	Guidance	Government agencies	https://www.nap.edu/catalog/18872/a-framework-to-guide-selection-of-chemical-alternatives	Chemicals	not specified	not specified	1	0	0	0	1	Social	workers	Child labour	1	ENV+SOC
2014	NRC	NRC 2014	0	Guidance	Government agencies	https://www.nap.edu/catalog/18872/a-framework-to-guide-selection-of-chemical-alternatives	Chemicals	not specified	not specified	1	0	0	0	1	Social	workers	Forced labour	1	ENV+SOC
2014	NRC	NRC 2014	0	Guidance	Government agencies	https://www.nap.edu/catalog/18872/a-framework-to-guide-selection-of-chemical-alternatives	Chemicals	not specified	not specified	1	0	0	0	1	Social	workers	Sexual harassment	1	ENV+SOC
2014	NRC	NRC 2014	0	Guidance	Government agencies	https://www.nap.edu/catalog/18872/a-framework-to-guide-selection-of-chemical-alternatives	Chemicals	not specified	not specified	1	0	0	0	1	Social	workers	Freedom of association and collective bargaining	1	ENV+SOC
2014	NRC	NRC 2014	0	Guidance	Government agencies	https://www.nap.edu/catalog/18872/a-framework-to-guide-selection-of-chemical-alternatives	Chemicals	not specified	not specified	1	0	0	0	1	Social	workers	Part time work	1	ENV+SOC
2014	NRC	NRC 2014	0	Guidance	Government agencies	https://www.nap.edu/catalog/18872/a-framework-to-guide-selection-of-chemical-alternatives	Chemicals	not specified	not specified	1	0	0	0	1	Social	workers	Fair salary	1	ENV+SOC
2014	NRC	NRC 2014	0	Guidance	Government agencies	https://www.nap.edu/catalog/18872/a-framework-to-guide-selection-of-chemical-alternatives	Chemicals	not specified	not specified	1	0	0	0	1	Social	workers	Working hours (e.g. maximum)/work-file balance	1	ENV+SOC
2014	Sell et al	Sell et al2014	1	Scientific article	Academia	https://doi.org/10.1002/cben.201300007	Chemicals	not specified		1	0	1	0	0	Environmental	Climate Change	GWP 100 (kg CO₂eq)	1	ENV+ECO
2014	Sell et al	Sell et al2014	1	Scientific article	Academia	https://doi.org/10.1002/cben.201300007	Chemicals	not specified		1	0	1	0	0	Economic	External cost	Life cycle cost	1	ENV+ECO
2015	Ahmad et al	Ahmad et al2015	1	Scientific article	Academia	https://doi.org/10.3303/CET1545190	Chemicals	Solvents		0	0	1	0	1	Resources-, processing, and product- related	Biodegradability	Biodegradablity (not specified)	1	SAF+ECO
2015	Ahmad et al	Ahmad et al2015	1	Scientific article	Academia	https://doi.org/10.3303/CET1545190	Chemicals	Solvents		0	0	1	0	1	Resources-, processing, and product- related	Energy	Energy consumption (kWh or MJ)	1	SAF+ECO
2015	Ahmad et al	Ahmad et al2015	1	Scientific article	Academia	https://doi.org/10.3303/CET1545190	Chemicals	Solvents		0	0	1	0	1	Economic	Internal cost	Purchase cost	1	SAF+ECO
2015	Boyes et al	Boyes et al2015	0	Scientific article	Academia	https://doi.org/10.1080/10408444.2017.1328400	Materials	Nanomaterials		0	1	0	0	1	Environmental	Toxicity	Ecotoxicity (not specified)	1	ENV
2015	Boyes et al	Boyes et al2015	0	Scientific article	Academia	https://doi.org/10.1080/10408444.2017.1328400	Materials	Nanomaterials		0	1	0	0	1	Environmental	Toxicity	Human toxicity (not specified)	1	ENV
2015	Martínez-Gallegos et al	Martínez-Gallegos et al2015	1	Scientific article	Academia	https://doi.org/10.1016/j.ces.2015.04.047	Chemicals	Solvents		0	0	0	0	1	Environmental	Water emission	Chemical oxigen demand (g)	1	ENV+SAF+ECO
2015	Martínez-Gallegos et al	Martínez-Gallegos et al2015	1	Scientific article	Academia	https://doi.org/10.1016/j.ces.2015.04.047	Chemicals	Solvents		0	0	0	0	1	Resources-, processing, and product- related	Circularity	Boiling temperature (°C)	1	ENV+SAF+ECO
2015	Martínez-Gallegos et al	Martínez-Gallegos et al2015	1	Scientific article	Academia	https://doi.org/10.1016/j.ces.2015.04.047	Chemicals	Solvents		0	0	0	0	1	Resources-, processing, and product- related	Energy	Cumulative energy demand (MJ)	1	ENV+SAF+ECO
2015	Martínez-Gallegos et al	Martínez-Gallegos et al2015	1	Scientific article	Academia	https://doi.org/10.1016/j.ces.2015.04.047	Chemicals	Solvents		0	0	0	0	1	Economic	Internal cost	Purchase cost	1	ENV+SAF+ECO
2015	Prat et al	Prat et al2015	1	Scientific article	Industry	https://doi.org/10.1039/C5GC01008J	Chemicals	Solvents		1	0	1	0	1	Environmental	Climate Change	GWP 100 (kg CO₂eq)	1	ENV+SAF+ECO
2015	Prat et al	Prat et al2015	1	Scientific article	Industry	https://doi.org/10.1039/C5GC01008J	Chemicals	Solvents		1	0	1	0	1	Environmental	Stratospheric ozone Depletion	Ozone depletion potential (kg CFC-11)	1	ENV+SAF+ECO
2015	Prat et al	Prat et al2015	1	Scientific article	Industry	https://doi.org/10.1039/C5GC01008J	Chemicals	Solvents		1	0	1	0	1	Resources-, processing, and product- related	Resources: types, quantity, and efficiency considerations	Renewable or fossil? (yes/no)	1	ENV+SAF+ECO
2015	Prat et al	Prat et al2015	1	Scientific article	Industry	https://doi.org/10.1039/C5GC01008J	Chemicals	Solvents		1	0	1	0	1	Resources-, processing, and product- related	Circularity	Boiling temperature (°C)	1	ENV+SAF+ECO
2015	Prat et al	Prat et al2015	1	Scientific article	Industry	https://doi.org/10.1039/C5GC01008J	Chemicals	Solvents		1	0	1	0	1	Resources-, processing, and product- related	Energy	Cumulative energy demand (MJ)	1	ENV+SAF+ECO
2015	Prat et al	Prat et al2015	1	Scientific article	Industry	https://doi.org/10.1039/C5GC01008J	Chemicals	Solvents		1	0	1	0	1	Economic	Other	Non-construction cost (tax, finantial cost)	1	ENV+SAF+ECO
2015	Saavalainen et al	Saavalainen et al2015	1	Scientific article	Academia	https://www.hindawi.com/journals/jchem/2015/402315/	Chemicals	Solvents		0	0	1	0	0	Environmental	Climate Change	CO2 balance	1	ENV+SAF+SOC+ECO
2015	Saavalainen et al	Saavalainen et al2015	1	Scientific article	Academia	https://www.hindawi.com/journals/jchem/2015/402315/	Chemicals	Solvents		0	0	1	0	0	Environmental	Integrated Assessment	Chemicals safety	1	ENV+SAF+SOC+ECO
2015	Saavalainen et al	Saavalainen et al2015	1	Scientific article	Academia	https://www.hindawi.com/journals/jchem/2015/402315/	Chemicals	Solvents		0	0	1	0	0	Resources-, processing, and product- related	Resources: types, quantity, and efficiency considerations	Renewability of resources	1	ENV+SAF+SOC+ECO
2015	Saavalainen et al	Saavalainen et al2015	1	Scientific article	Academia	https://www.hindawi.com/journals/jchem/2015/402315/	Chemicals	Solvents		0	0	1	0	0	Resources-, processing, and product- related	Resources: types, quantity, and efficiency considerations	Solid waste generation	1	ENV+SAF+SOC+ECO
2015	Saavalainen et al	Saavalainen et al2015	1	Scientific article	Academia	https://www.hindawi.com/journals/jchem/2015/402315/	Chemicals	Solvents		0	0	1	0	0	Resources-, processing, and product- related	Energy	Energy intensity	1	ENV+SAF+SOC+ECO
2015	Saavalainen et al	Saavalainen et al2015	1	Scientific article	Academia	https://www.hindawi.com/journals/jchem/2015/402315/	Chemicals	Solvents		0	0	1	0	0	Economic	Profitability	yield	1	ENV+SAF+SOC+ECO
2015	Saavalainen et al	Saavalainen et al2015	1	Scientific article	Academia	https://www.hindawi.com/journals/jchem/2015/402315/	Chemicals	Solvents		0	0	1	0	0	Social	workers	Workers health & safety	1	ENV+SAF+SOC+ECO
2015	Saavalainen et al	Saavalainen et al2015	1	Scientific article	Academia	https://www.hindawi.com/journals/jchem/2015/402315/	Chemicals	Solvents		0	0	1	0	0	Economic	Other	innovation potential (by number of publications)	1	ENV+SAF+SOC+ECO
2015	Saavalainen et al	Saavalainen et al2015	1	Scientific article	Academia	https://www.hindawi.com/journals/jchem/2015/402315/	Chemicals	Solvents		0	0	1	0	0	Economic	Other	feedstock price	1	ENV+SAF+SOC+ECO
2015	Saavalainen et al	Saavalainen et al2015	1	Scientific article	Academia	https://www.hindawi.com/journals/jchem/2015/402315/	Chemicals	Solvents		0	0	1	0	0	Economic	Other	Process cost	1	ENV+SAF+SOC+ECO
2015	Samani et al	Samani et al2015	1	Scientific article	Academia	https://doi.org/10.1016/j.buildenv.2015.04.012	Materials	Building materials		1	0	1	1	0	Environmental	Resources	Damage to Resources (Recipe)	1	ENV+ECO
2015	Samani et al	Samani et al2015	1	Scientific article	Academia	https://doi.org/10.1016/j.buildenv.2015.04.012	Materials	Building materials		1	0	1	1	0	Environmental	Integrated Assessment	Ecosystem quality (recipe)	1	ENV+ECO
2015	Samani et al	Samani et al2015	1	Scientific article	Academia	https://doi.org/10.1016/j.buildenv.2015.04.012	Materials	Building materials		1	0	1	1	0	Environmental	Integrated Assessment	Human health(recipe)	1	ENV+ECO
2015	Samani et al	Samani et al2015	1	Scientific article	Academia	https://doi.org/10.1016/j.buildenv.2015.04.012	Materials	Building materials		1	0	1	1	0	Economic	Internal cost	(Total) production cost (€)	1	ENV+ECO
2015	Smith et al	Smith et al2015	1	Scientific article	Government agencies	https://doi.org/10.1016/j.compchemeng.2015.04.020	Chemicals	not specified		1	0	1	0	1	Environmental	Toxicity	Freshwater (eco)toxicity (CTUe)	1	ENV+SAF+ECO
2015	Smith et al	Smith et al2015	1	Scientific article	Government agencies	https://doi.org/10.1016/j.compchemeng.2015.04.020	Chemicals	not specified		1	0	1	0	1	Environmental	Photochemical Ozone Formation	POCP (kg of ethene-eq or Kg NMVOC or kg O3)	1	ENV+SAF+ECO
2015	Smith et al	Smith et al2015	1	Scientific article	Government agencies	https://doi.org/10.1016/j.compchemeng.2015.04.020	Chemicals	not specified		1	0	1	0	1	Environmental	Toxicity	LCT human toxicity (mg intake)	1	ENV+SAF+ECO
2015	Smith et al	Smith et al2015	1	Scientific article	Government agencies	https://doi.org/10.1016/j.compchemeng.2015.04.020	Chemicals	not specified		1	0	1	0	1	Resources-, processing, and product- related	Resources: types, quantity, and efficiency considerations	Reaction efficiency (%)	1	ENV+SAF+ECO
2015	Smith et al	Smith et al2015	1	Scientific article	Government agencies	https://doi.org/10.1016/j.compchemeng.2015.04.020	Chemicals	not specified		1	0	1	0	1	Resources-, processing, and product- related	Resources: types, quantity, and efficiency considerations	Atom economy (%)	1	ENV+SAF+ECO
2015	Smith et al	Smith et al2015	1	Scientific article	Government agencies	https://doi.org/10.1016/j.compchemeng.2015.04.020	Chemicals	not specified		1	0	1	0	1	Resources-, processing, and product- related	Energy	Energy efficiency (%)	1	ENV+SAF+ECO
2015	Smith et al	Smith et al2015	1	Scientific article	Government agencies	https://doi.org/10.1016/j.compchemeng.2015.04.020	Chemicals	not specified		1	0	1	0	1	Economic	Profitability	Net present value (€)	1	ENV+SAF+ECO
2015	Smith et al	Smith et al2015	1	Scientific article	Government agencies	https://doi.org/10.1016/j.compchemeng.2015.04.020	Chemicals	not specified		1	0	1	0	1	Economic	Profitability	Payback period (y)	1	ENV+SAF+ECO
2015	The F-Gas Regulation	The F-Gas Regulation2015	0	Regulation	EU legislations	https://ec.europa.eu/clima/policies/f-gas/legislation_en	Chemicals	Fluorinated greenhouse gases (F-gases)		1	0	0	0	1	Environmental	Climate Change	GWP 100 (kg CO₂eq)	1	ENV
2016	Arora et al	Arora et al2016	1	Scientific article	Academia	http://d1.doi.org/10.1016/B978-0-444-63428-3.50088-6	Chemicals	not specified		1	0	1	0	0	Environmental	Climate Change	GWP 100 (kg CO₂eq)	1	ENV+ECO
2016	Arora et al	Arora et al2016	1	Scientific article	Academia	http://d1.doi.org/10.1016/B978-0-444-63428-3.50088-6	Chemicals	not specified		1	0	1	0	0	Environmental	Acidification	Acidification potential (molc H+ eq)	1	ENV+ECO
2016	Arora et al	Arora et al2016	1	Scientific article	Academia	http://d1.doi.org/10.1016/B978-0-444-63428-3.50088-6	Chemicals	not specified		1	0	1	0	0	Environmental	Eutrophication	Marine eutrophication potential (mol N eq)	1	ENV+ECO
2016	Arora et al	Arora et al2016	1	Scientific article	Academia	http://d1.doi.org/10.1016/B978-0-444-63428-3.50088-6	Chemicals	not specified		1	0	1	0	0	Environmental	Eutrophication	Freshwater eutrophication potential (kg P eq)	1	ENV+ECO
2016	Arora et al	Arora et al2016	1	Scientific article	Academia	http://d1.doi.org/10.1016/B978-0-444-63428-3.50088-6	Chemicals	not specified		1	0	1	0	0	Environmental	Stratospheric ozone Depletion	Ozone depletion potential (kg CFC-11)	1	ENV+ECO
2016	Arora et al	Arora et al2016	1	Scientific article	Academia	http://d1.doi.org/10.1016/B978-0-444-63428-3.50088-6	Chemicals	not specified		1	0	1	0	0	Environmental	Resources	Land occupation (m2a crop eq)	1	ENV+ECO
2016	Arora et al	Arora et al2016	1	Scientific article	Academia	http://d1.doi.org/10.1016/B978-0-444-63428-3.50088-6	Chemicals	not specified		1	0	1	0	0	Economic	External cost	Life cycle cost	1	ENV+ECO
2016	Asadi et al	Asadi et al2016	0	Scientific article	Academia	https://doi.org/10.1016/j.jclepro.2016.08.006	Chemicals	Polymers		1	0	1	0	0	Environmental	Climate Change	GWP 100 (kg CO₂eq)	1	ENV+SAF+ECO
2016	Asadi et al	Asadi et al2016	0	Scientific article	Academia	https://doi.org/10.1016/j.jclepro.2016.08.006	Chemicals	Polymers		1	0	1	0	0	Environmental	Toxicity	Ecotoxicity (CTU)	1	ENV+SAF+ECO
2016	Asadi et al	Asadi et al2016	0	Scientific article	Academia	https://doi.org/10.1016/j.jclepro.2016.08.006	Chemicals	Polymers		1	0	1	0	0	Environmental	Acidification	Acidification potential (molc H+ eq)	1	ENV+SAF+ECO
2016	Asadi et al	Asadi et al2016	0	Scientific article	Academia	https://doi.org/10.1016/j.jclepro.2016.08.006	Chemicals	Polymers		1	0	1	0	0	Environmental	Eutrophication	Terrestrial eutrophication potential (kg of N equivalents)	1	ENV+SAF+ECO
2016	Asadi et al	Asadi et al2016	0	Scientific article	Academia	https://doi.org/10.1016/j.jclepro.2016.08.006	Chemicals	Polymers		1	0	1	0	0	Environmental	Stratospheric ozone Depletion	Ozone depletion potential (kg CFC-11)	1	ENV+SAF+ECO
2016	Asadi et al	Asadi et al2016	0	Scientific article	Academia	https://doi.org/10.1016/j.jclepro.2016.08.006	Chemicals	Polymers		1	0	1	0	0	Environmental	Photochemical Ozone Formation	POCP (kg of ethene-eq or Kg NMVOC or kg O3)	1	ENV+SAF+ECO
2016	Asadi et al	Asadi et al2016	0	Scientific article	Academia	https://doi.org/10.1016/j.jclepro.2016.08.006	Chemicals	Polymers		1	0	1	0	0	Environmental	Resources	Resource use/depletion - fossil (MJ)	1	ENV+SAF+ECO
2016	Asadi et al	Asadi et al2016	0	Scientific article	Academia	https://doi.org/10.1016/j.jclepro.2016.08.006	Chemicals	Polymers		1	0	1	0	0	Environmental	Integrated Assessment	Human Health (DALY)	1	ENV+SAF+ECO
2016	Asadi et al	Asadi et al2016	0	Scientific article	Academia	https://doi.org/10.1016/j.jclepro.2016.08.006	Chemicals	Polymers		1	0	1	0	0	Environmental	Air emission	Atmospheric NOx emissions (g)	1	ENV+SAF+ECO
2016	Asadi et al	Asadi et al2016	0	Scientific article	Academia	https://doi.org/10.1016/j.jclepro.2016.08.006	Chemicals	Polymers		1	0	1	0	0	Resources-, processing, and product- related	Resources: types, quantity, and efficiency considerations	Water consumption (m3)	1	ENV+SAF+ECO
2016	Asadi et al	Asadi et al2016	0	Scientific article	Academia	https://doi.org/10.1016/j.jclepro.2016.08.006	Chemicals	Polymers		1	0	1	0	0	Economic	External cost	Life cycle cost	1	ENV+SAF+ECO
2016	Fantke et al	Fantke et al2016	0	Scientific article	Academia	https://doi.org/10.1016/j.envint.2016.06.010	Chemicals	not specified		1	0	0	0	1	Environmental	Toxicity	LCT human toxicity (mg intake)	1	ENV					non-fatal accidents
2016	Isoni et al	Isoni et al2016	0	Scientific article	Academia	https://doi.org/10.1039/c6gc02440h	Chemicals	Solvents		1	1	1	1	1	Environmental	Climate Change	GWP 100 (kg CO₂eq)	1	ENV+SAF+ECO
2016	Isoni et al	Isoni et al2016	0	Scientific article	Academia	https://doi.org/10.1039/c6gc02440h	Chemicals	Solvents		1	1	1	1	1	Environmental	Toxicity	Human toxicity potential (kg 1,4 DCB eq or CTUh)	1	ENV+SAF+ECO
2016	Isoni et al	Isoni et al2016	0	Scientific article	Academia	https://doi.org/10.1039/c6gc02440h	Chemicals	Solvents		1	1	1	1	1	Environmental	Acidification	Terrestrial acidification (kg SO2eq)	1	ENV+SAF+ECO
2016	Isoni et al	Isoni et al2016	0	Scientific article	Academia	https://doi.org/10.1039/c6gc02440h	Chemicals	Solvents		1	1	1	1	1	Environmental	Eutrophication	Eutrophication potential (kg of phosphate )	1	ENV+SAF+ECO
2016	Isoni et al	Isoni et al2016	0	Scientific article	Academia	https://doi.org/10.1039/c6gc02440h	Chemicals	Solvents		1	1	1	1	1	Resources-, processing, and product- related	Resources: types, quantity, and efficiency considerations	Reaction efficiency (%)	1	ENV+SAF+ECO
2016	Isoni et al	Isoni et al2016	0	Scientific article	Academia	https://doi.org/10.1039/c6gc02440h	Chemicals	Solvents		1	1	1	1	1	Resources-, processing, and product- related	Energy	Energy consumption (kWh or MJ)	1	ENV+SAF+ECO
2016	Isoni et al	Isoni et al2016	0	Scientific article	Academia	https://doi.org/10.1039/c6gc02440h	Chemicals	Solvents		1	1	1	1	1	Economic	Internal cost	Purchase cost	1	ENV+SAF+ECO
2016	Isoni et al	Isoni et al2016	0	Scientific article	Academia	https://doi.org/10.1039/c6gc02440h	Chemicals	Solvents		1	1	1	1	1	Economic	Other	Non-construction cost (tax, finantial cost)	1	ENV+SAF+ECO
2016	Jayakrishna et al	Jayakrishna et al2016	0	Scientific article	Academia	https://doi.org/10.1007/s40032-016-0283-4	Materials	not specified	Automotive	1	0	1	0	0	Environmental	Climate Change	GWP 100 (kg CO₂eq)	1	ENV
2016	Jayakrishna et al	Jayakrishna et al2016	0	Scientific article	Academia	https://doi.org/10.1007/s40032-016-0283-4	Materials	not specified	Automotive	1	0	1	0	0	Environmental	Acidification	Acidification potential (molc H+ eq)	1	ENV
2016	Jayakrishna et al	Jayakrishna et al2016	0	Scientific article	Academia	https://doi.org/10.1007/s40032-016-0283-4	Materials	not specified	Automotive	1	0	1	0	0	Environmental	Eutrophication	Eutrophication potential (kg of phosphate )	1	ENV
2016	Jayakrishna et al	Jayakrishna et al2016	0	Scientific article	Academia	https://doi.org/10.1007/s40032-016-0283-4	Materials	not specified	Automotive	1	0	1	0	0	Environmental	Stratospheric ozone Depletion	Ozone depletion potential (kg CFC-11)	1	ENV
2016	Jayakrishna et al	Jayakrishna et al2016	0	Scientific article	Academia	https://doi.org/10.1007/s40032-016-0283-4	Materials	not specified	Automotive	1	0	1	0	0	Environmental	Integrated Assessment	Eco-indicator 99 total [-]	1	ENV
2016	Jia et al	Jia et al2016	0	Scientific article	Academia	https://doi.org/10.1007/s10098-015-1075-x	Chemicals	not specified		0	0	1	0	1	Environmental	Climate Change	GWP 100 (kg CO₂eq)	1	ENV+ECO
2016	Jia et al	Jia et al2016	0	Scientific article	Academia	https://doi.org/10.1007/s10098-015-1075-x	Chemicals	not specified		0	0	1	0	1	Environmental	Toxicity	Ecotoxicity (not specified)	1	ENV+ECO
2016	Jia et al	Jia et al2016	0	Scientific article	Academia	https://doi.org/10.1007/s10098-015-1075-x	Chemicals	not specified		0	0	1	0	1	Environmental	Toxicity	Human toxicity (not specified)	1	ENV+ECO
2016	Jia et al	Jia et al2016	0	Scientific article	Academia	https://doi.org/10.1007/s10098-015-1075-x	Chemicals	not specified		0	0	1	0	1	Environmental	Acidification	Acidification potential (molc H+ eq)	1	ENV+ECO
2016	Jia et al	Jia et al2016	0	Scientific article	Academia	https://doi.org/10.1007/s10098-015-1075-x	Chemicals	not specified		0	0	1	0	1	Environmental	Eutrophication	Eutrophication potential (kg of phosphate )	1	ENV+ECO
2016	Jia et al	Jia et al2016	0	Scientific article	Academia	https://doi.org/10.1007/s10098-015-1075-x	Chemicals	not specified		0	0	1	0	1	Environmental	Stratospheric ozone Depletion	Ozone depletion potential (kg CFC-11)	1	ENV+ECO
2016	Jia et al	Jia et al2016	0	Scientific article	Academia	https://doi.org/10.1007/s10098-015-1075-x	Chemicals	not specified		0	0	1	0	1	Environmental	Photochemical Ozone Formation	POCP (kg of ethene-eq or Kg NMVOC or kg O3)	1	ENV+ECO
2016	Jia et al	Jia et al2016	0	Scientific article	Academia	https://doi.org/10.1007/s10098-015-1075-x	Chemicals	not specified		0	0	1	0	1	Economic	Internal cost	(Total) production cost (€)	1	ENV+ECO
2016	Limleamthong et al	Limleamthong et al2016	0	Scientific article	Academia	DOI: 10.1002/ieam.1449	Chemicals	not specified		1	0	1	0	0	Environmental	Integrated Assessment	Eco-indicator 99 total [-]	1	ENV
2016	Martin	Martin2016	0	Scientific article	Academia	https://doi.org/10.1007/s10098-016-1300-2	Chemicals	Flame retardants		0	1	0	0	1	Environmental	Toxicity	Human toxicity (not specified)	1	ENV+ECO
2016	Martin	Martin2016	0	Scientific article	Academia	https://doi.org/10.1007/s10098-016-1300-2	Chemicals	Flame retardants		0	1	0	0	1	Environmental	Toxicity	LCT human toxicity (mg intake)	1	ENV+ECO
2016	Martin	Martin2016	0	Scientific article	Academia	https://doi.org/10.1007/s10098-016-1300-2	Chemicals	Flame retardants		0	1	0	0	1	Economic	Internal cost	Purchase cost	1	ENV+ECO
2016	Moralles at al	Moralles at al2016	0	Scientific article	Academia	DOI https://doi.org/10.1039/C6EE00634E	Chemicals	Surfactant		1	0	1	0	1	Environmental	Climate Change	GWP 100 (kg CO₂eq)	1	ENV+SAF
2016	Moralles at al	Moralles at al2016	0	Scientific article	Academia	DOI https://doi.org/10.1039/C6EE00634E	Chemicals	Surfactant		1	0	1	0	1	Environmental	Integrated Assessment	Eco-indicator 99 total [-]	1	ENV+SAF
2016	Moralles at al	Moralles at al2016	0	Scientific article	Academia	DOI https://doi.org/10.1039/C6EE00634E	Chemicals	Surfactant		1	0	1	0	1	Resources-, processing, and product- related	Energy	Cumulative energy demand (MJ)	1	ENV+SAF
2016	Piccino et al	Piccino et al2016	1	Scientific article	Academia	https://doi.org/10.1016/j.jclepro.2015.06.105	Materials	Nanomaterials		1	0	1	0	0	Environmental	Climate Change	GWP 100 (kg CO₂eq)	1	ENV+SAF+ECO
2016	Piccino et al	Piccino et al2016	1	Scientific article	Academia	https://doi.org/10.1016/j.jclepro.2015.06.105	Materials	Nanomaterials		1	0	1	0	0	Environmental	Resources	Damage to Resources (Recipe)	1	ENV+SAF+ECO
2016	Piccino et al	Piccino et al2016	1	Scientific article	Academia	https://doi.org/10.1016/j.jclepro.2015.06.105	Materials	Nanomaterials		1	0	1	0	0	Environmental	Integrated Assessment	Ecosystem quality (recipe)	1	ENV+SAF+ECO
2016	Piccino et al	Piccino et al2016	1	Scientific article	Academia	https://doi.org/10.1016/j.jclepro.2015.06.105	Materials	Nanomaterials		1	0	1	0	0	Environmental	Integrated Assessment	Human health(recipe)	1	ENV+SAF+ECO
2016	Piccino et al	Piccino et al2016	1	Scientific article	Academia	https://doi.org/10.1016/j.jclepro.2015.06.105	Materials	Nanomaterials		1	0	1	0	0	Resources-, processing, and product- related	Energy	Cumulative energy demand (MJ)	1	ENV+SAF+ECO
2016	Piccino et al	Piccino et al2016	1	Scientific article	Academia	https://doi.org/10.1016/j.jclepro.2015.06.105	Materials	Nanomaterials		1	0	1	0	0	Economic	Internal cost	(Total) production cost (€)	1	ENV+SAF+ECO
2016	Simanovska et al	Simanovska et al2016	1	Scientific article	Academia	DOI:10.3176/proc.2016.3.11DOI:10.3176/proc.2016.3.11v	Products	not applicable	Cosmetics	0	0	1	0	0	Environmental	Resources	Resource use/depletion - fossil (MJ)	1	ENV+SAF
2016	Simanovska et al	Simanovska et al2016	1	Scientific article	Academia	DOI:10.3176/proc.2016.3.11DOI:10.3176/proc.2016.3.11v	Products	not applicable	Cosmetics	0	0	1	0	0	Resources-, processing, and product- related	Circularity	Durability (years)	1	ENV+SAF
2016	UBA	UBA2016	0	Guidance	Government agencies	https://www.umweltbundesamt.de/en/publikationen/guide-on-sustainable-chemicals	Chemicals	not specified		1	0	1	0	1	Environmental	Climate Change	GWP 100 (kg CO₂eq)	1	ENV+SAF+SOC+ECO
2016	UBA	UBA2016	0	Guidance	Government agencies	https://www.umweltbundesamt.de/en/publikationen/guide-on-sustainable-chemicals	Chemicals	not specified		1	0	1	0	1	Resources-, processing, and product- related	Resources: types, quantity, and efficiency considerations	Renewable or fossil? (yes/no)	1	ENV+SAF+SOC+ECO
2016	UBA	UBA2016	0	Guidance	Government agencies	https://www.umweltbundesamt.de/en/publikationen/guide-on-sustainable-chemicals	Chemicals	not specified		1	0	1	0	1	Resources-, processing, and product- related	Resources: types, quantity, and efficiency considerations	Use of critical raw materials? (yes/no)	1	ENV+SAF+SOC+ECO
2016	UBA	UBA2016	0	Guidance	Government agencies	https://www.umweltbundesamt.de/en/publikationen/guide-on-sustainable-chemicals	Chemicals	not specified		1	0	1	0	1	Resources-, processing, and product- related	Resources: types, quantity, and efficiency considerations	Water consumption (m3)	1	ENV+SAF+SOC+ECO
2016	UBA	UBA2016	0	Guidance	Government agencies	https://www.umweltbundesamt.de/en/publikationen/guide-on-sustainable-chemicals	Chemicals	not specified		1	0	1	0	1	Resources-, processing, and product- related	Energy	Energy consumption (kWh or MJ)	1	ENV+SAF+SOC+ECO
2016	UBA	UBA2016	0	Guidance	Government agencies	https://www.umweltbundesamt.de/en/publikationen/guide-on-sustainable-chemicals	Chemicals	not specified		1	0	1	0	1	Social	value chain actors	Supply chain responsibility score	1	ENV+SAF+SOC+ECO
2016	UBA	UBA2016	0	Guidance	Government agencies	https://www.umweltbundesamt.de/en/publikationen/guide-on-sustainable-chemicals	Chemicals	not specified		1	0	1	0	1	Social	value chain actors	Tracking capacity	1	ENV+SAF+SOC+ECO
2016	UBA	UBA2016	0	Guidance	Government agencies	https://www.umweltbundesamt.de/en/publikationen/guide-on-sustainable-chemicals	Chemicals	not specified		1	0	1	0	1	Economic	Profitability	Profitability (conceptual)	1	ENV+SAF+SOC+ECO
2016	UBA	UBA2016	0	Guidance	Government agencies	https://www.umweltbundesamt.de/en/publikationen/guide-on-sustainable-chemicals	Chemicals	not specified		1	0	1	0	1	Economic	Internal cost	Product cost	1	ENV+SAF+SOC+ECO
2017	IC2	IC22017	0	Guidance	Government agencies	http://theic2.org/alternatives_assessment_guide#gsc.tab=0	Chemicals	not specified		1	0	1	1	1	Environmental	Climate Change	GWP 100 (kg CO₂eq)	1	ENV+SAF+SOC+ECO
2017	IC2	IC22017	0	Guidance	Government agencies	http://theic2.org/alternatives_assessment_guide#gsc.tab=0	Chemicals	not specified		1	0	1	1	1	Environmental	Toxicity	Ecotoxicity (not specified)	1	ENV+SAF+SOC+ECO
2017	IC2	IC22017	0	Guidance	Government agencies	http://theic2.org/alternatives_assessment_guide#gsc.tab=0	Chemicals	not specified		1	0	1	1	1	Environmental	Toxicity	Human toxicity (not specified)	1	ENV+SAF+SOC+ECO
2017	IC2	IC22017	0	Guidance	Government agencies	http://theic2.org/alternatives_assessment_guide#gsc.tab=0	Chemicals	not specified		1	0	1	1	1	Environmental	Acidification	Acidification potential (molc H+ eq)	1	ENV+SAF+SOC+ECO
2017	IC2	IC22017	0	Guidance	Government agencies	http://theic2.org/alternatives_assessment_guide#gsc.tab=0	Chemicals	not specified		1	0	1	1	1	Environmental	Eutrophication	Eutrophication potential (kg of phosphate )	1	ENV+SAF+SOC+ECO
2017	IC2	IC22017	0	Guidance	Government agencies	http://theic2.org/alternatives_assessment_guide#gsc.tab=0	Chemicals	not specified		1	0	1	1	1	Environmental	Photochemical Ozone Formation	POCP (kg of ethene-eq or Kg NMVOC or kg O3)	1	ENV+SAF+SOC+ECO
2017	IC2	IC22017	0	Guidance	Government agencies	http://theic2.org/alternatives_assessment_guide#gsc.tab=0	Chemicals	not specified		1	0	1	1	1	Environmental	Resources	Land use (not specified)	1	ENV+SAF+SOC+ECO
2017	IC2	IC22017	0	Guidance	Government agencies	http://theic2.org/alternatives_assessment_guide#gsc.tab=0	Chemicals	not specified		1	0	1	1	1	Environmental	Resources	Resource depletion potential (kg Sb eq)	1	ENV+SAF+SOC+ECO
2017	IC2	IC22017	0	Guidance	Government agencies	http://theic2.org/alternatives_assessment_guide#gsc.tab=0	Chemicals	not specified		1	0	1	1	1	Resources-, processing, and product- related	Resources: types, quantity, and efficiency considerations	Material intensity index (%)	1	ENV+SAF+SOC+ECO
2017	IC2	IC22017	0	Guidance	Government agencies	http://theic2.org/alternatives_assessment_guide#gsc.tab=0	Chemicals	not specified		1	0	1	1	1	Social	society	Corruption prevention initiatives	1	ENV+SAF+SOC+ECO
2017	IC2	IC22017	0	Guidance	Government agencies	http://theic2.org/alternatives_assessment_guide#gsc.tab=0	Chemicals	not specified		1	0	1	1	1	Social	workers	Equal opportunities and discrimination	1	ENV+SAF+SOC+ECO
2017	IC2	IC22017	0	Guidance	Government agencies	http://theic2.org/alternatives_assessment_guide#gsc.tab=0	Chemicals	not specified		1	0	1	1	1	Social	workers	Age	1	ENV+SAF+SOC+ECO
2017	IC2	IC22017	0	Guidance	Government agencies	http://theic2.org/alternatives_assessment_guide#gsc.tab=0	Chemicals	not specified		1	0	1	1	1	Social	workers	Disability	1	ENV+SAF+SOC+ECO
2017	IC2	IC22017	0	Guidance	Government agencies	http://theic2.org/alternatives_assessment_guide#gsc.tab=0	Chemicals	not specified		1	0	1	1	1	Social	local community	Human rights (LCA impact category)	1	ENV+SAF+SOC+ECO
2017	IC2	IC22017	0	Guidance	Government agencies	http://theic2.org/alternatives_assessment_guide#gsc.tab=0	Chemicals	not specified		1	0	1	1	1	Social	workers	Child labour	1	ENV+SAF+SOC+ECO
2017	IC2	IC22017	0	Guidance	Government agencies	http://theic2.org/alternatives_assessment_guide#gsc.tab=0	Chemicals	not specified		1	0	1	1	1	Social	workers	Sexual harassment	1	ENV+SAF+SOC+ECO
2017	IC2	IC22017	0	Guidance	Government agencies	http://theic2.org/alternatives_assessment_guide#gsc.tab=0	Chemicals	not specified		1	0	1	1	1	Social	society	Life expectancy at birth	1	ENV+SAF+SOC+ECO
2017	IC2	IC22017	0	Guidance	Government agencies	http://theic2.org/alternatives_assessment_guide#gsc.tab=0	Chemicals	not specified		1	0	1	1	1	Social	workers	Working conditions (LCA impact category)	1	ENV+SAF+SOC+ECO
2017	IC2	IC22017	0	Guidance	Government agencies	http://theic2.org/alternatives_assessment_guide#gsc.tab=0	Chemicals	not specified		1	0	1	1	1	Social	workers	Working hours (e.g. maximum)/work-file balance	1	ENV+SAF+SOC+ECO
2017	IC2	IC22017	0	Guidance	Government agencies	http://theic2.org/alternatives_assessment_guide#gsc.tab=0	Chemicals	not specified		1	0	1	1	1	Economic	Internal cost	Purchase cost	1	ENV+SAF+SOC+ECO
2017	IC2	IC22017	0	Guidance	Government agencies	http://theic2.org/alternatives_assessment_guide#gsc.tab=0	Chemicals	not specified		1	0	1	1	1	Economic	External cost	Life cycle cost	1	ENV+SAF+SOC+ECO
2017	Jolliffe and Gerogiorgis	Jolliffe and Gerogiorgis2017	1	Scientific article	Academia	https://doi.org/10.1016/j.compchemeng.2017.02.046	Chemicals	Solvents		0	0	0	0	1	Resources-, processing, and product- related	Resources: types, quantity, and efficiency considerations	E-factor (%)	1	SAF+ECO
2017	Jolliffe and Gerogiorgis	Jolliffe and Gerogiorgis2017	1	Scientific article	Academia	https://doi.org/10.1016/j.compchemeng.2017.02.046	Chemicals	Solvents		0	0	0	0	1	Resources-, processing, and product- related	Circularity	Recycling efficiency/recovery rate (%)	1	SAF+ECO
2017	Jolliffe and Gerogiorgis	Jolliffe and Gerogiorgis2017	1	Scientific article	Academia	https://doi.org/10.1016/j.compchemeng.2017.02.046	Chemicals	Solvents		0	0	0	0	1	Economic	Internal cost	(Total) production cost (€)	1	SAF+ECO
2017	Moretti et al	Moretti et al2017	0	Scientific article	Academia	https://doi.org/10.3390/ijerph14060645	Materials	Building materials	Construction	0	0	1	0	0	Environmental	Climate Change	GWP 100 (kg CO₂eq)	1	ENV+SAF+ECO
2017	Moretti et al	Moretti et al2017	0	Scientific article	Academia	https://doi.org/10.3390/ijerph14060645	Materials	Building materials	Construction	0	0	1	0	0	Environmental	Eutrophication	Eutrophication potential (kg of phosphate )	1	ENV+SAF+ECO
2017	Moretti et al	Moretti et al2017	0	Scientific article	Academia	https://doi.org/10.3390/ijerph14060645	Materials	Building materials	Construction	0	0	1	0	0	Environmental	Stratospheric ozone Depletion	Ozone depletion potential (kg CFC-11)	1	ENV+SAF+ECO
2017	Moretti et al	Moretti et al2017	0	Scientific article	Academia	https://doi.org/10.3390/ijerph14060645	Materials	Building materials	Construction	0	0	1	0	0	Environmental	Resources	Water depletion potential (m3eq)	1	ENV+SAF+ECO
2017	Moretti et al	Moretti et al2017	0	Scientific article	Academia	https://doi.org/10.3390/ijerph14060645	Materials	Building materials	Construction	0	0	1	0	0	Resources-, processing, and product- related	Resources: types, quantity, and efficiency considerations	Hazard Waste	1	ENV+SAF+ECO
2017	Moretti et al	Moretti et al2017	0	Scientific article	Academia	https://doi.org/10.3390/ijerph14060645	Materials	Building materials	Construction	0	0	1	0	0	Resources-, processing, and product- related	Resources: types, quantity, and efficiency considerations	Non hazard waste	1	ENV+SAF+ECO
2017	Moretti et al	Moretti et al2017	0	Scientific article	Academia	https://doi.org/10.3390/ijerph14060645	Materials	Building materials	Construction	0	0	1	0	0	Resources-, processing, and product- related	Resources: types, quantity, and efficiency considerations	Water consumption (m3)	1	ENV+SAF+ECO
2017	Moretti et al	Moretti et al2017	0	Scientific article	Academia	https://doi.org/10.3390/ijerph14060645	Materials	Building materials	Construction	0	0	1	0	0	Resources-, processing, and product- related	Energy	Energy consumption (kWh or MJ)	1	ENV+SAF+ECO
2017	Moretti et al	Moretti et al2017	0	Scientific article	Academia	https://doi.org/10.3390/ijerph14060645	Materials	Building materials	Construction	0	0	1	0	0	Resources-, processing, and product- related	Energy	Renewable Resources with energy content (MJ)	1	ENV+SAF+ECO
2017	Moretti et al	Moretti et al2017	0	Scientific article	Academia	https://doi.org/10.3390/ijerph14060645	Materials	Building materials	Construction	0	0	1	0	0	Resources-, processing, and product- related	Energy	Non-renewable resources with energy content (MJ)	1	ENV+SAF+ECO
2017	Moretti et al	Moretti et al2017	0	Scientific article	Academia	https://doi.org/10.3390/ijerph14060645	Materials	Building materials	Construction	0	0	1	0	0	Economic	Internal cost	Purchase cost	1	ENV+SAF+ECO
2017	Natureplus	Natureplus2017	0	Certification	Certification schemes	https://www.natureplus.org/	Materials	Building materials	Construction	1	0	0	0	1	Environmental	Climate Change	GWP 100 (kg CO₂eq)	1	ENV+SAF+SOC
2017	Natureplus	Natureplus2017	0	Certification	Certification schemes	https://www.natureplus.org/	Materials	Building materials	Construction	1	0	0	0	1	Resources-, processing, and product- related	Resources: types, quantity, and efficiency considerations	Renewable or fossil? (yes/no)	1	ENV+SAF+SOC
2017	Natureplus	Natureplus2017	0	Certification	Certification schemes	https://www.natureplus.org/	Materials	Building materials	Construction	1	0	0	0	1	Resources-, processing, and product- related	Energy	Energy efficiency (%)	1	ENV+SAF+SOC
2017	Natureplus	Natureplus2017	0	Certification	Certification schemes	https://www.natureplus.org/	Materials	Building materials	Construction	1	0	0	0	1	Social	society	Corruption prevention initiatives	1	ENV+SAF+SOC
2017	Natureplus	Natureplus2017	0	Certification	Certification schemes	https://www.natureplus.org/	Materials	Building materials	Construction	1	0	0	0	1	Social	workers	Respect for the national standards for security and social responsibility	1	ENV+SAF+SOC
2017	Natureplus	Natureplus2017	0	Certification	Certification schemes	https://www.natureplus.org/	Materials	Building materials	Construction	1	0	0	0	1	Social	local community	Human rights (conceptual)	1	ENV+SAF+SOC
2017	Natureplus	Natureplus2017	0	Certification	Certification schemes	https://www.natureplus.org/	Materials	Building materials	Construction	1	0	0	0	1	Social	workers	Child labour	1	ENV+SAF+SOC
2017	Natureplus	Natureplus2017	0	Certification	Certification schemes	https://www.natureplus.org/	Materials	Building materials	Construction	1	0	0	0	1	Social	workers	Forced labour	1	ENV+SAF+SOC
2017	Nkambule and Blignaut	Nkambule and Blignaut 2017	0	Scientific article	Academia	https://doi.org/10.17159/sajs.2017/20160314	Products	not applicable	Energy	1	0	0	0	0	Environmental	Climate Change	GWP 100 (kg CO₂eq)	1	ENV+SAF+SOC+ECO
2017	Nkambule and Blignaut	Nkambule and Blignaut 2017	0	Scientific article	Academia	https://doi.org/10.17159/sajs.2017/20160314	Products	not applicable	Energy	1	0	0	0	0	Environmental	Resources	Land occupation (m2a crop eq)	1	ENV+SAF+SOC+ECO
2017	Nkambule and Blignaut	Nkambule and Blignaut 2017	0	Scientific article	Academia	https://doi.org/10.17159/sajs.2017/20160314	Products	not applicable	Energy	1	0	0	0	0	Environmental	Integrated Assessment	Biodiversity protection (conceptual)	1	ENV+SAF+SOC+ECO
2017	Nkambule and Blignaut	Nkambule and Blignaut 2017	0	Scientific article	Academia	https://doi.org/10.17159/sajs.2017/20160314	Products	not applicable	Energy	1	0	0	0	0	Environmental	Air emission	Fine particulate matter (mg PM 2.5)	1	ENV+SAF+SOC+ECO
2017	Nkambule and Blignaut	Nkambule and Blignaut 2017	0	Scientific article	Academia	https://doi.org/10.17159/sajs.2017/20160314	Products	not applicable	Energy	1	0	0	0	0	Environmental	Air emission	Atmospheric SO2 emissions (g)	1	ENV+SAF+SOC+ECO
2017	Nkambule and Blignaut	Nkambule and Blignaut 2017	0	Scientific article	Academia	https://doi.org/10.17159/sajs.2017/20160314	Products	not applicable	Energy	1	0	0	0	0	Environmental	Air emission	Atmospheric NOx emissions (g)	1	ENV+SAF+SOC+ECO
2017	Nkambule and Blignaut	Nkambule and Blignaut 2017	0	Scientific article	Academia	https://doi.org/10.17159/sajs.2017/20160314	Products	not applicable	Energy	1	0	0	0	0	Resources-, processing, and product- related	Resources: types, quantity, and efficiency considerations	Water consumption (m3)	1	ENV+SAF+SOC+ECO
2017	Nkambule and Blignaut	Nkambule and Blignaut 2017	0	Scientific article	Academia	https://doi.org/10.17159/sajs.2017/20160314	Products	not applicable	Energy	1	0	0	0	0	Social	workers	Noise reduction	1	ENV+SAF+SOC+ECO
2017	Nkambule and Blignaut	Nkambule and Blignaut 2017	0	Scientific article	Academia	https://doi.org/10.17159/sajs.2017/20160314	Products	not applicable	Energy	1	0	0	0	0	Social	workers	Rate of injuries	1	ENV+SAF+SOC+ECO
2017	Nkambule and Blignaut	Nkambule and Blignaut 2017	0	Scientific article	Academia	https://doi.org/10.17159/sajs.2017/20160314	Products	not applicable	Energy	1	0	0	0	0	Economic	External cost	Externality cost (€)	1	ENV+SAF+SOC+ECO
2017	Nkambule and Blignaut	Nkambule and Blignaut 2017	0	Scientific article	Academia	https://doi.org/10.17159/sajs.2017/20160314	Products	not applicable	Energy	1	0	0	0	0	Economic	External cost	Life cycle cost	1	ENV+SAF+SOC+ECO
2017	Xu et al	Xu et al2017	0	Scientific article	Academia	https://doi.org/10.1021/acs.iecr.7b02041	Chemicals	not specified		1	0	1	0	0	Environmental	Climate Change	GWP 100 (kg CO₂eq)	1	ENV+SAF+SOC+ECO
2017	Xu et al	Xu et al2017	0	Scientific article	Academia	https://doi.org/10.1021/acs.iecr.7b02041	Chemicals	not specified		1	0	1	0	0	Environmental	Toxicity	Marine ecotoxicity (g C6H4CI2-eq)	1	ENV+SAF+SOC+ECO
2017	Xu et al	Xu et al2017	0	Scientific article	Academia	https://doi.org/10.1021/acs.iecr.7b02041	Chemicals	not specified		1	0	1	0	0	Environmental	Toxicity	Freshwater ecotoxicity (g C6H4CI2-eq)	1	ENV+SAF+SOC+ECO
2017	Xu et al	Xu et al2017	0	Scientific article	Academia	https://doi.org/10.1021/acs.iecr.7b02041	Chemicals	not specified		1	0	1	0	0	Environmental	Toxicity	Terrestrial ecotoxicity (g C6H4CI2-eq)	1	ENV+SAF+SOC+ECO
2017	Xu et al	Xu et al2017	0	Scientific article	Academia	https://doi.org/10.1021/acs.iecr.7b02041	Chemicals	not specified		1	0	1	0	0	Environmental	Toxicity	Human toxicity potential (kg 1,4 DCB eq or CTUh)	1	ENV+SAF+SOC+ECO
2017	Xu et al	Xu et al2017	0	Scientific article	Academia	https://doi.org/10.1021/acs.iecr.7b02041	Chemicals	not specified		1	0	1	0	0	Environmental	Acidification	Acidification potential (molc H+ eq)	1	ENV+SAF+SOC+ECO
2017	Xu et al	Xu et al2017	0	Scientific article	Academia	https://doi.org/10.1021/acs.iecr.7b02041	Chemicals	not specified		1	0	1	0	0	Environmental	Eutrophication	Eutrophication potential (kg of phosphate )	1	ENV+SAF+SOC+ECO
2017	Xu et al	Xu et al2017	0	Scientific article	Academia	https://doi.org/10.1021/acs.iecr.7b02041	Chemicals	not specified		1	0	1	0	0	Environmental	Stratospheric ozone Depletion	Ozone depletion potential (kg CFC-11)	1	ENV+SAF+SOC+ECO
2017	Xu et al	Xu et al2017	0	Scientific article	Academia	https://doi.org/10.1021/acs.iecr.7b02041	Chemicals	not specified		1	0	1	0	0	Environmental	Photochemical Ozone Formation	POCP (kg of ethene-eq or Kg NMVOC or kg O3)	1	ENV+SAF+SOC+ECO
2017	Xu et al	Xu et al2017	0	Scientific article	Academia	https://doi.org/10.1021/acs.iecr.7b02041	Chemicals	not specified		1	0	1	0	0	Environmental	Resources	Resource depletion potential (kg Sb eq)	1	ENV+SAF+SOC+ECO
2017	Xu et al	Xu et al2017	0	Scientific article	Academia	https://doi.org/10.1021/acs.iecr.7b02041	Chemicals	not specified		1	0	1	0	0	Environmental	Resources	Resources depletion ($)	1	ENV+SAF+SOC+ECO
2017	Xu et al	Xu et al2017	0	Scientific article	Academia	https://doi.org/10.1021/acs.iecr.7b02041	Chemicals	not specified		1	0	1	0	0	Environmental	Integrated Assessment	Ecosystems (species.yr)	1	ENV+SAF+SOC+ECO
2017	Xu et al	Xu et al2017	0	Scientific article	Academia	https://doi.org/10.1021/acs.iecr.7b02041	Chemicals	not specified		1	0	1	0	0	Environmental	Integrated Assessment	Human Health (DALY)	1	ENV+SAF+SOC+ECO
2017	Xu et al	Xu et al2017	0	Scientific article	Academia	https://doi.org/10.1021/acs.iecr.7b02041	Chemicals	not specified		1	0	1	0	0	Resources-, processing, and product- related	Energy	Energy efficiency (%)	1	ENV+SAF+SOC+ECO
2017	Xu et al	Xu et al2017	0	Scientific article	Academia	https://doi.org/10.1021/acs.iecr.7b02041	Chemicals	not specified		1	0	1	0	0	Social	local community	Local employment	1	ENV+SAF+SOC+ECO
2017	Xu et al	Xu et al2017	0	Scientific article	Academia	https://doi.org/10.1021/acs.iecr.7b02041	Chemicals	not specified		1	0	1	0	0	Social	workers	Workers health & safety	1	ENV+SAF+SOC+ECO
2017	Xu et al	Xu et al2017	0	Scientific article	Academia	https://doi.org/10.1021/acs.iecr.7b02041	Chemicals	not specified		1	0	1	0	0	Social	local community	Human rights (LCA impact category)	1	ENV+SAF+SOC+ECO
2017	Xu et al	Xu et al2017	0	Scientific article	Academia	https://doi.org/10.1021/acs.iecr.7b02041	Chemicals	not specified		1	0	1	0	0	Social	society	Life expectancy at birth	1	ENV+SAF+SOC+ECO
2017	Xu et al	Xu et al2017	0	Scientific article	Academia	https://doi.org/10.1021/acs.iecr.7b02041	Chemicals	not specified		1	0	1	0	0	Economic	External cost	Life cycle cost	1	ENV+SAF+SOC+ECO
2017	Zhong et al	Zhong et al2017	0	Scientific article	Academia	https://ascelibrary.org/doi/epdf/10.1061/%28ASCE%29CO.1943-7862.0001210	Materials	Building materials	Construction	1	0	1	0	0	Environmental	Climate Change	GWP 100 (kg CO₂eq)	1	ENV+SAF+SOC+ECO
2017	Zhong et al	Zhong et al2017	0	Scientific article	Academia	https://ascelibrary.org/doi/epdf/10.1061/%28ASCE%29CO.1943-7862.0001210	Materials	Building materials	Construction	1	0	1	0	0	Resources-, processing, and product- related	Resources: types, quantity, and efficiency considerations	Water consumption (m3)	1	ENV+SAF+SOC+ECO
2017	Zhong et al	Zhong et al2017	0	Scientific article	Academia	https://ascelibrary.org/doi/epdf/10.1061/%28ASCE%29CO.1943-7862.0001210	Materials	Building materials	Construction	1	0	1	0	0	Resources-, processing, and product- related	Resources: types, quantity, and efficiency considerations	Solid waste (kg/ton)	1	ENV+SAF+SOC+ECO
2017	Zhong et al	Zhong et al2017	0	Scientific article	Academia	https://ascelibrary.org/doi/epdf/10.1061/%28ASCE%29CO.1943-7862.0001210	Materials	Building materials	Construction	1	0	1	0	0	Resources-, processing, and product- related	Circularity	Recyclability/circularity (conceptual)	1	ENV+SAF+SOC+ECO
2017	Zhong et al	Zhong et al2017	0	Scientific article	Academia	https://ascelibrary.org/doi/epdf/10.1061/%28ASCE%29CO.1943-7862.0001210	Materials	Building materials	Construction	1	0	1	0	0	Resources-, processing, and product- related	Circularity	Reuse rate/reusability	1	ENV+SAF+SOC+ECO
2017	Zhong et al	Zhong et al2017	0	Scientific article	Academia	https://ascelibrary.org/doi/epdf/10.1061/%28ASCE%29CO.1943-7862.0001210	Materials	Building materials	Construction	1	0	1	0	0	Resources-, processing, and product- related	Circularity	Recyclabile? (yes/no)	1	ENV+SAF+SOC+ECO
2017	Zhong et al	Zhong et al2017	0	Scientific article	Academia	https://ascelibrary.org/doi/epdf/10.1061/%28ASCE%29CO.1943-7862.0001210	Materials	Building materials	Construction	1	0	1	0	0	Resources-, processing, and product- related	Circularity	Recycling efficiency/recovery rate (%)	1	ENV+SAF+SOC+ECO
2017	Zhong et al	Zhong et al2017	0	Scientific article	Academia	https://ascelibrary.org/doi/epdf/10.1061/%28ASCE%29CO.1943-7862.0001210	Materials	Building materials	Construction	1	0	1	0	0	Social	local community	Human Satisfaction (appropriateness for culture and level of noise and vibration)	1	ENV+SAF+SOC+ECO
2017	Zhong et al	Zhong et al2017	0	Scientific article	Academia	https://ascelibrary.org/doi/epdf/10.1061/%28ASCE%29CO.1943-7862.0001210	Materials	Building materials	Construction	1	0	1	0	0	Economic	External cost	Life cycle cost	1	ENV+SAF+SOC+ECO
2017	Zhong et al	Zhong et al2017	0	Scientific article	Academia	https://ascelibrary.org/doi/epdf/10.1061/%28ASCE%29CO.1943-7862.0001210	Materials	Building materials	Construction	1	0	1	0	0	Economic	Other	Additional income (incentives, flexibility, additional area)	1	ENV+SAF+SOC+ECO
2017	Zhong et al	Zhong et al2017	0	Scientific article	Academia	https://ascelibrary.org/doi/epdf/10.1061/%28ASCE%29CO.1943-7862.0001210	Materials	Building materials	Construction	1	0	1	0	0	Economic	Other	Non-construction cost (tax, finantial cost)	1	ENV+SAF+SOC+ECO
2018	Acar et al	Acar et al2018	0	Scientific article	Academia	https://doi.org/10.1016/j.ijhydene.2018.08.024	Chemicals	Fuels		0	0	1	1	0	Environmental	Climate Change	GWP 100 (kg CO₂eq)	1	ENV+SAF+SOC
2018	Acar et al	Acar et al2018	0	Scientific article	Academia	https://doi.org/10.1016/j.ijhydene.2018.08.024	Chemicals	Fuels		0	0	1	1	0	Environmental	Resources	Land use (not specified)	1	ENV+SAF+SOC
2018	Acar et al	Acar et al2018	0	Scientific article	Academia	https://doi.org/10.1016/j.ijhydene.2018.08.024	Chemicals	Fuels		0	0	1	1	0	Environmental	Integrated Assessment	Influence/Impact on public health	1	ENV+SAF+SOC
2018	Acar et al	Acar et al2018	0	Scientific article	Academia	https://doi.org/10.1016/j.ijhydene.2018.08.024	Chemicals	Fuels		0	0	1	1	0	Environmental	Water emission	Water Discharge quality	1	ENV+SAF+SOC
2018	Acar et al	Acar et al2018	0	Scientific article	Academia	https://doi.org/10.1016/j.ijhydene.2018.08.024	Chemicals	Fuels		0	0	1	1	0	Resources-, processing, and product- related	Resources: types, quantity, and efficiency considerations	Solid waste generation	1	ENV+SAF+SOC
2018	Acar et al	Acar et al2018	0	Scientific article	Academia	https://doi.org/10.1016/j.ijhydene.2018.08.024	Chemicals	Fuels		0	0	1	1	0	Resources-, processing, and product- related	Energy	Energy efficiency (%)	1	ENV+SAF+SOC
2018	Acar et al	Acar et al2018	0	Scientific article	Academia	https://doi.org/10.1016/j.ijhydene.2018.08.024	Chemicals	Fuels		0	0	1	1	0	Social	local community	Local employment	1	ENV+SAF+SOC
2018	Acar et al	Acar et al2018	0	Scientific article	Academia	https://doi.org/10.1016/j.ijhydene.2018.08.024	Chemicals	Fuels		0	0	1	1	0	Social	local community	Community acceptance	1	ENV+SAF+SOC
2018	Acar et al	Acar et al2018	0	Scientific article	Academia	https://doi.org/10.1016/j.ijhydene.2018.08.024	Chemicals	Fuels		0	0	1	1	0	Social	workers	Part time work	1	ENV+SAF+SOC
2018	BASF	BASF2018	0	Guidance	Industry	https://www.basf.com/global/documents/en/sustainability/we-drive-sustainable-solutions/sustainable-solution-steering/November%202018_Sustainable%20Solution%20Steering%20Manual.pdf	Products	not specified		1	0	1	0	1	Environmental	Climate Change	GWP 100 (kg CO₂eq)	1	ENV+SAF+SOC+ECO
2018	BASF	BASF2018	0	Guidance	Industry	https://www.basf.com/global/documents/en/sustainability/we-drive-sustainable-solutions/sustainable-solution-steering/November%202018_Sustainable%20Solution%20Steering%20Manual.pdf	Products	not specified		1	0	1	0	1	Environmental	Resources	Water depletion potential (m3eq)	1	ENV+SAF+SOC+ECO
2018	BASF	BASF2018	0	Guidance	Industry	https://www.basf.com/global/documents/en/sustainability/we-drive-sustainable-solutions/sustainable-solution-steering/November%202018_Sustainable%20Solution%20Steering%20Manual.pdf	Products	not specified		1	0	1	0	1	Environmental	Integrated Assessment	Biodiversity protection (conceptual)	1	ENV+SAF+SOC+ECO
2018	BASF	BASF2018	0	Guidance	Industry	https://www.basf.com/global/documents/en/sustainability/we-drive-sustainable-solutions/sustainable-solution-steering/November%202018_Sustainable%20Solution%20Steering%20Manual.pdf	Products	not specified		1	0	1	0	1	Resources-, processing, and product- related	Resources: types, quantity, and efficiency considerations	Renewable or fossil? (yes/no)	1	ENV+SAF+SOC+ECO
2018	BASF	BASF2018	0	Guidance	Industry	https://www.basf.com/global/documents/en/sustainability/we-drive-sustainable-solutions/sustainable-solution-steering/November%202018_Sustainable%20Solution%20Steering%20Manual.pdf	Products	not specified		1	0	1	0	1	Resources-, processing, and product- related	Resources: types, quantity, and efficiency considerations	Amount of (solid/water) waste (kg or %)	1	ENV+SAF+SOC+ECO
2018	BASF	BASF2018	0	Guidance	Industry	https://www.basf.com/global/documents/en/sustainability/we-drive-sustainable-solutions/sustainable-solution-steering/November%202018_Sustainable%20Solution%20Steering%20Manual.pdf	Products	not specified		1	0	1	0	1	Resources-, processing, and product- related	Circularity	Recyclability/circularity (conceptual)	1	ENV+SAF+SOC+ECO
2018	BASF	BASF2018	0	Guidance	Industry	https://www.basf.com/global/documents/en/sustainability/we-drive-sustainable-solutions/sustainable-solution-steering/November%202018_Sustainable%20Solution%20Steering%20Manual.pdf	Products	not specified		1	0	1	0	1	Resources-, processing, and product- related	Circularity	Recycled content (%)	1	ENV+SAF+SOC+ECO
2018	BASF	BASF2018	0	Guidance	Industry	https://www.basf.com/global/documents/en/sustainability/we-drive-sustainable-solutions/sustainable-solution-steering/November%202018_Sustainable%20Solution%20Steering%20Manual.pdf	Products	not specified		1	0	1	0	1	Resources-, processing, and product- related	Circularity	Disassembly/reparability design (conceptual)	1	ENV+SAF+SOC+ECO
2018	BASF	BASF2018	0	Guidance	Industry	https://www.basf.com/global/documents/en/sustainability/we-drive-sustainable-solutions/sustainable-solution-steering/November%202018_Sustainable%20Solution%20Steering%20Manual.pdf	Products	not specified		1	0	1	0	1	Resources-, processing, and product- related	Circularity	Durability (years)	1	ENV+SAF+SOC+ECO
2018	BASF	BASF2018	0	Guidance	Industry	https://www.basf.com/global/documents/en/sustainability/we-drive-sustainable-solutions/sustainable-solution-steering/November%202018_Sustainable%20Solution%20Steering%20Manual.pdf	Products	not specified		1	0	1	0	1	Resources-, processing, and product- related	Biodegradability	Biodegradability requirement (EU law specification)	1	ENV+SAF+SOC+ECO
2018	BASF	BASF2018	0	Guidance	Industry	https://www.basf.com/global/documents/en/sustainability/we-drive-sustainable-solutions/sustainable-solution-steering/November%202018_Sustainable%20Solution%20Steering%20Manual.pdf	Products	not specified		1	0	1	0	1	Resources-, processing, and product- related	Energy	Energy consumption (kWh or MJ)	1	ENV+SAF+SOC+ECO
2018	BASF	BASF2018	0	Guidance	Industry	https://www.basf.com/global/documents/en/sustainability/we-drive-sustainable-solutions/sustainable-solution-steering/November%202018_Sustainable%20Solution%20Steering%20Manual.pdf	Products	not specified		1	0	1	0	1	Social	society	Poverty alleviation	1	ENV+SAF+SOC+ECO
2018	BASF	BASF2018	0	Guidance	Industry	https://www.basf.com/global/documents/en/sustainability/we-drive-sustainable-solutions/sustainable-solution-steering/November%202018_Sustainable%20Solution%20Steering%20Manual.pdf	Products	not specified		1	0	1	0	1	Social	workers	Noise reduction	1	ENV+SAF+SOC+ECO
2018	BASF	BASF2018	0	Guidance	Industry	https://www.basf.com/global/documents/en/sustainability/we-drive-sustainable-solutions/sustainable-solution-steering/November%202018_Sustainable%20Solution%20Steering%20Manual.pdf	Products	not specified		1	0	1	0	1	Social	workers	Workers health & safety	1	ENV+SAF+SOC+ECO
2018	BASF	BASF2018	0	Guidance	Industry	https://www.basf.com/global/documents/en/sustainability/we-drive-sustainable-solutions/sustainable-solution-steering/November%202018_Sustainable%20Solution%20Steering%20Manual.pdf	Products	not specified		1	0	1	0	1	Economic	Profitability	Profitability (conceptual)	1	ENV+SAF+SOC+ECO
2018	Cignitti et al	Cignitti et al2018	1	Scientific article	Academia	https://doi.org/10.1021/acs.iecr.7b04216	Chemicals	not specified		0	0	0	0	1	Environmental	Climate Change	GWP 100 (kg CO₂eq)	1	ENV+SAF
2018	Cignitti et al	Cignitti et al2018	1	Scientific article	Academia	https://doi.org/10.1021/acs.iecr.7b04216	Chemicals	not specified		0	0	0	0	1	Environmental	Stratospheric ozone Depletion	Ozone depletion potential (kg CFC-11)	1	ENV+SAF
2018	Cignitti et al	Cignitti et al2018	1	Scientific article	Academia	https://doi.org/10.1021/acs.iecr.7b04216	Chemicals	not specified		0	0	0	0	1	Resources-, processing, and product- related	Energy	Energy efficiency (%)	1	ENV+SAF
2018	Gonzalez-Garay and Guillen-Gosalbez	Gonzalez-Garay and Guillen-Gosalbez2018	1	Scientific article	Academia	https://doi.org/10.1016/B978-0-444-64241-7.50280-9	Chemicals	Precursor		1	0	1	0	0	Environmental	Climate Change	GWP 100 (kg CO₂eq)	1	ENV+ECO
2018	Gonzalez-Garay and Guillen-Gosalbez	Gonzalez-Garay and Guillen-Gosalbez2018	1	Scientific article	Academia	https://doi.org/10.1016/B978-0-444-64241-7.50280-9	Chemicals	Precursor		1	0	1	0	0	Environmental	Toxicity	Human toxicity potential (kg 1,4 DCB eq or CTUh)	1	ENV+ECO
2018	Gonzalez-Garay and Guillen-Gosalbez	Gonzalez-Garay and Guillen-Gosalbez2018	1	Scientific article	Academia	https://doi.org/10.1016/B978-0-444-64241-7.50280-9	Chemicals	Precursor		1	0	1	0	0	Environmental	Eutrophication	Eutrophication potential (kg of phosphate )	1	ENV+ECO
2018	Gonzalez-Garay and Guillen-Gosalbez	Gonzalez-Garay and Guillen-Gosalbez2018	1	Scientific article	Academia	https://doi.org/10.1016/B978-0-444-64241-7.50280-9	Chemicals	Precursor		1	0	1	0	0	Environmental	Photochemical Ozone Formation	POCP (kg of ethene-eq or Kg NMVOC or kg O3)	1	ENV+ECO
2018	Gonzalez-Garay and Guillen-Gosalbez	Gonzalez-Garay and Guillen-Gosalbez2018	1	Scientific article	Academia	https://doi.org/10.1016/B978-0-444-64241-7.50280-9	Chemicals	Precursor		1	0	1	0	0	Economic	Profitability	Financial profit (€)	1	ENV+ECO
2018	Gonzalez-Garay and Guillen-Gosalbez	Gonzalez-Garay and Guillen-Gosalbez2018	1	Scientific article	Academia	https://doi.org/10.1016/B978-0-444-64241-7.50280-9	Chemicals	Precursor		1	0	1	0	0	Economic	Profitability	Net present value (€)	1	ENV+ECO
2018	Gonzalez-Garay and Guillen-Gosalbez	Gonzalez-Garay and Guillen-Gosalbez2018	1	Scientific article	Academia	https://doi.org/10.1016/B978-0-444-64241-7.50280-9	Chemicals	Precursor		1	0	1	0	0	Economic	Internal cost	(Total) production cost (€)	1	ENV+ECO
2018	IEEE	IEEE2018	0	Certification	International organisation	https://ieee1plore.ieee.org/document/9062658	Products	not applicable	Electronics	1	0	0	0	1	Environmental	Climate Change	GWP 100 (kg CO₂eq)	1	ENV+SAF+SOC
2018	IEEE	IEEE2018	0	Certification	International organisation	https://ieee1plore.ieee.org/document/9062658	Products	not applicable	Electronics	1	0	0	0	1	Resources-, processing, and product- related	Resources: types, quantity, and efficiency considerations	Reaction efficiency (%)	1	ENV+SAF+SOC
2018	IEEE	IEEE2018	0	Certification	International organisation	https://ieee1plore.ieee.org/document/9062658	Products	not applicable	Electronics	1	0	0	0	1	Resources-, processing, and product- related	Circularity	Recyclabile? (yes/no)	1	ENV+SAF+SOC
2018	IEEE	IEEE2018	0	Certification	International organisation	https://ieee1plore.ieee.org/document/9062658	Products	not applicable	Electronics	1	0	0	0	1	Resources-, processing, and product- related	Energy	Energy consumption (kWh or MJ)	1	ENV+SAF+SOC
2018	IEEE	IEEE2018	0	Certification	International organisation	https://ieee1plore.ieee.org/document/9062658	Products	not applicable	Electronics	1	0	0	0	1	Social	workers	Respect for the national standards for security and social responsibility	1	ENV+SAF+SOC
2018	IEEE	IEEE2018	0	Certification	International organisation	https://ieee1plore.ieee.org/document/9062658	Products	not applicable	Electronics	1	0	0	0	1	Social	workers	Child labour	1	ENV+SAF+SOC
2018	IEEE	IEEE2018	0	Certification	International organisation	https://ieee1plore.ieee.org/document/9062658	Products	not applicable	Electronics	1	0	0	0	1	Social	workers	Forced labour	1	ENV+SAF+SOC
2018	IEEE	IEEE2018	0	Certification	International organisation	https://ieee1plore.ieee.org/document/9062658	Products	not applicable	Electronics	1	0	0	0	1	Social	workers	Freedom of association and collective bargaining	1	ENV+SAF+SOC
2018	IEEE	IEEE2018	0	Certification	International organisation	https://ieee1plore.ieee.org/document/9062658	Products	not applicable	Electronics	1	0	0	0	1	Social	workers	Fair salary	1	ENV+SAF+SOC
2018	IEEE	IEEE2018	0	Certification	International organisation	https://ieee1plore.ieee.org/document/9062658	Products	not applicable	Electronics	1	0	0	0	1	Social	workers	Working hours (e.g. maximum)/work-file balance	1	ENV+SAF+SOC
2018	Ma et al	Ma et al2018	0	Scientific article	Academia	https://ieeexplore.ieee.org/document/8488680	Materials	Vehicle (carrier)	Automotive	1	0	1	0	0	Environmental	Climate Change	GWP 100 (kg CO₂eq)	1	SAF
2018	Ma et al	Ma et al2018	0	Scientific article	Academia	https://ieeexplore.ieee.org/document/8488680	Materials	Vehicle (carrier)	Automotive	1	0	1	0	0	Environmental	Acidification	Acidification potential (molc H+ eq)	1	SAF
2018	Ma et al	Ma et al2018	0	Scientific article	Academia	https://ieeexplore.ieee.org/document/8488680	Materials	Vehicle (carrier)	Automotive	1	0	1	0	0	Environmental	Eutrophication	Eutrophication potential (kg of phosphate )	1	SAF
2018	Ma et al	Ma et al2018	0	Scientific article	Academia	https://ieeexplore.ieee.org/document/8488680	Materials	Vehicle (carrier)	Automotive	1	0	1	0	0	Environmental	Stratospheric ozone Depletion	Ozone depletion potential (kg CFC-11)	1	SAF
2018	Ma et al	Ma et al2018	0	Scientific article	Academia	https://ieeexplore.ieee.org/document/8488680	Materials	Vehicle (carrier)	Automotive	1	0	1	0	0	Environmental	Resources	Resource use/depletion - fossil (MJ)	1	SAF
2018	Ma et al	Ma et al2018	0	Scientific article	Academia	https://ieeexplore.ieee.org/document/8488680	Materials	Vehicle (carrier)	Automotive	1	0	1	0	0	Economic	Internal cost	(Total) production cost (€)	1	SAF
2018	OECD	OECD2018	0	Guidance	International organisation	https://www.oecd.org/environment/waste/background-paper-sustainable-plastics-from-a-chemicals-perspective-considerations-and-criteria.pdf	Materials	Plastics	not specified	1	1	0	0	1	Environmental	Resources	Limiting depletion of fossil/mineral resources (conceptual)	1	ENV+SAF
2018	OECD	OECD2018	0	Guidance	International organisation	https://www.oecd.org/environment/waste/background-paper-sustainable-plastics-from-a-chemicals-perspective-considerations-and-criteria.pdf	Materials	Plastics	not specified	1	1	0	0	1	Resources-, processing, and product- related	Resources: types, quantity, and efficiency considerations	Renewable or fossil? (yes/no)	1	ENV+SAF
2018	OECD	OECD2018	0	Guidance	International organisation	https://www.oecd.org/environment/waste/background-paper-sustainable-plastics-from-a-chemicals-perspective-considerations-and-criteria.pdf	Materials	Plastics	not specified	1	1	0	0	1	Resources-, processing, and product- related	Circularity	Recyclability/circularity (conceptual)	1	ENV+SAF
2018	OECD	OECD2018	0	Guidance	International organisation	https://www.oecd.org/environment/waste/background-paper-sustainable-plastics-from-a-chemicals-perspective-considerations-and-criteria.pdf	Materials	Plastics	not specified	1	1	0	0	1	Resources-, processing, and product- related	Biodegradability	Marine biodegradability (conceptual)	1	ENV+SAF
2018	OECD	OECD2018	0	Guidance	International organisation	https://www.oecd.org/environment/waste/background-paper-sustainable-plastics-from-a-chemicals-perspective-considerations-and-criteria.pdf	Materials	Plastics	not specified	1	1	0	0	1	Resources-, processing, and product- related	Biodegradability	Biodegradability requirement (EU law specification)	1	ENV+SAF
2018	Ooi et al	Ooi et al2018	1	Scientific article	Academia	https://doi.org/10.1016/j.compchemeng.2018.06.008	Chemicals	Solvents		1	0	1	1	1	Environmental	Climate Change	GWP 100 (kg CO₂eq)	1	ENV+SAF+ECO
2018	Ooi et al	Ooi et al2018	1	Scientific article	Academia	https://doi.org/10.1016/j.compchemeng.2018.06.008	Chemicals	Solvents		1	0	1	1	1	Environmental	Toxicity	Freshwater (eco)toxicity (CTUe)	1	ENV+SAF+ECO
2018	Ooi et al	Ooi et al2018	1	Scientific article	Academia	https://doi.org/10.1016/j.compchemeng.2018.06.008	Chemicals	Solvents		1	0	1	1	1	Environmental	Toxicity	Terrestrial ecotoxicity (g C6H4CI2-eq)	1	ENV+SAF+ECO
2018	Ooi et al	Ooi et al2018	1	Scientific article	Academia	https://doi.org/10.1016/j.compchemeng.2018.06.008	Chemicals	Solvents		1	0	1	1	1	Environmental	Toxicity	Human toxicity – cancer potential (CTUh)	1	ENV+SAF+ECO
2018	Ooi et al	Ooi et al2018	1	Scientific article	Academia	https://doi.org/10.1016/j.compchemeng.2018.06.008	Chemicals	Solvents		1	0	1	1	1	Environmental	Acidification	Atmospheric acidification (kg SO2eq)	1	ENV+SAF+ECO
2018	Ooi et al	Ooi et al2018	1	Scientific article	Academia	https://doi.org/10.1016/j.compchemeng.2018.06.008	Chemicals	Solvents		1	0	1	1	1	Environmental	Acidification	Aquatic acidification (kg H+ ions)	1	ENV+SAF+ECO
2018	Ooi et al	Ooi et al2018	1	Scientific article	Academia	https://doi.org/10.1016/j.compchemeng.2018.06.008	Chemicals	Solvents		1	0	1	1	1	Environmental	Eutrophication	Eutrophication potential (kg of phosphate )	1	ENV+SAF+ECO
2018	Ooi et al	Ooi et al2018	1	Scientific article	Academia	https://doi.org/10.1016/j.compchemeng.2018.06.008	Chemicals	Solvents		1	0	1	1	1	Environmental	Stratospheric ozone Depletion	Ozone depletion potential (kg CFC-11)	1	ENV+SAF+ECO
2018	Ooi et al	Ooi et al2018	1	Scientific article	Academia	https://doi.org/10.1016/j.compchemeng.2018.06.008	Chemicals	Solvents		1	0	1	1	1	Environmental	Photochemical Ozone Formation	POCP (kg of ethene-eq or Kg NMVOC or kg O3)	1	ENV+SAF+ECO
2018	Ooi et al	Ooi et al2018	1	Scientific article	Academia	https://doi.org/10.1016/j.compchemeng.2018.06.008	Chemicals	Solvents		1	0	1	1	1	Environmental	Water emission	Biological oxigen demand 5 (g)	1	ENV+SAF+ECO
2018	Ooi et al	Ooi et al2018	1	Scientific article	Academia	https://doi.org/10.1016/j.compchemeng.2018.06.008	Chemicals	Solvents		1	0	1	1	1	Resources-, processing, and product- related	Energy	Energy consumption (kWh or MJ)	1	ENV+SAF+ECO
2018	Ooi et al	Ooi et al2018	1	Scientific article	Academia	https://doi.org/10.1016/j.compchemeng.2018.06.008	Chemicals	Solvents		1	0	1	1	1	Economic	Internal cost	Purchase cost	1	ENV+SAF+ECO
2018	Pinheiro et al	Pinheiro et al2018	0	Scientific article	Academia	https://doi.org/10.1021/acssuschemeng.8b00646	Chemicals	Solvents		0	0	1	1	1	Environmental	Air emission	Atmospheric VOC emissions (g)	1	ENV+SAF+ECO
2018	Pinheiro et al	Pinheiro et al2018	0	Scientific article	Academia	https://doi.org/10.1021/acssuschemeng.8b00646	Chemicals	Solvents		0	0	1	1	1	Resources-, processing, and product- related	Resources: types, quantity, and efficiency considerations	Reaction efficiency (%)	1	ENV+SAF+ECO
2018	Pinheiro et al	Pinheiro et al2018	0	Scientific article	Academia	https://doi.org/10.1021/acssuschemeng.8b00646	Chemicals	Solvents		0	0	1	1	1	Economic	External cost	Waste (incl. emissions)/recycling treatment cost	1	ENV+SAF+ECO
2018	Pinheiro et al	Pinheiro et al2018	0	Scientific article	Academia	https://doi.org/10.1021/acssuschemeng.8b00646	Chemicals	Solvents		0	0	1	1	1	Resources-, processing, and product- related	Circularity	Boiling temperature (°C)	1	ENV+SAF+ECO
2018	Pinheiro et al	Pinheiro et al2018	0	Scientific article	Academia	https://doi.org/10.1021/acssuschemeng.8b00646	Chemicals	Solvents		0	0	1	1	1	Resources-, processing, and product- related	Circularity	Solvent selectivity [-]	1	ENV+SAF+ECO
2018	Pinheiro et al	Pinheiro et al2018	0	Scientific article	Academia	https://doi.org/10.1021/acssuschemeng.8b00646	Chemicals	Solvents		0	0	1	1	1	Resources-, processing, and product- related	Circularity	Yield of extraction (%)	1	ENV+SAF+ECO
2018	Pinheiro et al	Pinheiro et al2018	0	Scientific article	Academia	https://doi.org/10.1021/acssuschemeng.8b00646	Chemicals	Solvents		0	0	1	1	1	Resources-, processing, and product- related	Circularity	Number of carbon atoms	1	ENV+SAF+ECO
2018	Pinheiro et al	Pinheiro et al2018	0	Scientific article	Academia	https://doi.org/10.1021/acssuschemeng.8b00646	Chemicals	Solvents		0	0	1	1	1	Economic	Internal cost	(Total) production cost (€)	1	ENV+SAF+ECO
2018	Reddy et al	Reddy et al2018	0	Scientific article	Academia	https://doi.org/10.1080/19397038.2019.1581853	Materials	not specified	Construction	1	0	1	1	1	Environmental	Climate Change	GWP 100 (kg CO₂eq)	1	ENV+SAF+SOC+ECO
2018	Reddy et al	Reddy et al2018	0	Scientific article	Academia	https://doi.org/10.1080/19397038.2019.1581853	Materials	not specified	Construction	1	0	1	1	1	Resources-, processing, and product- related	Resources: types, quantity, and efficiency considerations	Resources Consumption	1	ENV+SAF+SOC+ECO
2018	Reddy et al	Reddy et al2018	0	Scientific article	Academia	https://doi.org/10.1080/19397038.2019.1581853	Materials	not specified	Construction	1	0	1	1	1	Resources-, processing, and product- related	Circularity	Recyclability/circularity (conceptual)	1	ENV+SAF+SOC+ECO
2018	Reddy et al	Reddy et al2018	0	Scientific article	Academia	https://doi.org/10.1080/19397038.2019.1581853	Materials	not specified	Construction	1	0	1	1	1	Resources-, processing, and product- related	Circularity	Reuse rate/reusability	1	ENV+SAF+SOC+ECO
2018	Reddy et al	Reddy et al2018	0	Scientific article	Academia	https://doi.org/10.1080/19397038.2019.1581853	Materials	not specified	Construction	1	0	1	1	1	Social	local community	Local employment	1	ENV+SAF+SOC+ECO
2018	Reddy et al	Reddy et al2018	0	Scientific article	Academia	https://doi.org/10.1080/19397038.2019.1581853	Materials	not specified	Construction	1	0	1	1	1	Economic	Other	Costumer acceptance and satisfaction	1	ENV+SAF+SOC+ECO
2018	Reddy et al	Reddy et al2018	0	Scientific article	Academia	https://doi.org/10.1080/19397038.2019.1581853	Materials	not specified	Construction	1	0	1	1	1	Economic	External cost	Life cycle cost	1	ENV+SAF+SOC+ECO
2018	Vinodh	Vinodh2018	1	Scientific article	Academia	https://link.springer.com/article/10.1007/s10098-018-1610-7	Materials	Protective membrane	IT	0	0	1	1	0	Environmental	Climate Change	GWP 100 (kg CO₂eq)	1	ENV+SAF
2018	Vinodh	Vinodh2018	1	Scientific article	Academia	https://link.springer.com/article/10.1007/s10098-018-1610-7	Materials	Protective membrane	IT	0	0	1	1	0	Environmental	Air emission	Air emissions	1	ENV+SAF
2018	Vinodh	Vinodh2018	1	Scientific article	Academia	https://link.springer.com/article/10.1007/s10098-018-1610-7	Materials	Protective membrane	IT	0	0	1	1	0	Environmental	Water emission	Water emissions	1	ENV+SAF
2018	Vinodh	Vinodh2018	1	Scientific article	Academia	https://link.springer.com/article/10.1007/s10098-018-1610-7	Materials	Protective membrane	IT	0	0	1	1	0	Resources-, processing, and product- related	Circularity	Recyclability/circularity (conceptual)	1	ENV+SAF
2018	Vinodh	Vinodh2018	1	Scientific article	Academia	https://link.springer.com/article/10.1007/s10098-018-1610-7	Materials	Protective membrane	IT	0	0	1	1	0	Resources-, processing, and product- related	Energy	Energy consumption (kWh or MJ)	1	ENV+SAF
2018	WBCSD	WBCSD2018	0	Guidance	International organisation	https://www.wbcsd.org/Programs/Circular-Economy/Resources/Chemical-Industry-Methodology-for-Portfolio-Sustainability-Assessments	Chemicals	not specified		1	0	1	0	1	Environmental	Climate Change	GWP 100 (kg CO₂eq)	1	ENV+SAF+SOC+ECO
2018	WBCSD	WBCSD2018	0	Guidance	International organisation	https://www.wbcsd.org/Programs/Circular-Economy/Resources/Chemical-Industry-Methodology-for-Portfolio-Sustainability-Assessments	Chemicals	not specified		1	0	1	0	1	Environmental	Toxicity	Ecotoxicity (CTU)	1	ENV+SAF+SOC+ECO
2018	WBCSD	WBCSD2018	0	Guidance	International organisation	https://www.wbcsd.org/Programs/Circular-Economy/Resources/Chemical-Industry-Methodology-for-Portfolio-Sustainability-Assessments	Chemicals	not specified		1	0	1	0	1	Environmental	Toxicity	Human toxicity – no cancer potential (CTUh)	1	ENV+SAF+SOC+ECO
2018	WBCSD	WBCSD2018	0	Guidance	International organisation	https://www.wbcsd.org/Programs/Circular-Economy/Resources/Chemical-Industry-Methodology-for-Portfolio-Sustainability-Assessments	Chemicals	not specified		1	0	1	0	1	Environmental	Toxicity	Human toxicity – cancer potential (CTUh)	1	ENV+SAF+SOC+ECO
2018	WBCSD	WBCSD2018	0	Guidance	International organisation	https://www.wbcsd.org/Programs/Circular-Economy/Resources/Chemical-Industry-Methodology-for-Portfolio-Sustainability-Assessments	Chemicals	not specified		1	0	1	0	1	Environmental	Acidification	Acidification potential (molc H+ eq)	1	ENV+SAF+SOC+ECO
2018	WBCSD	WBCSD2018	0	Guidance	International organisation	https://www.wbcsd.org/Programs/Circular-Economy/Resources/Chemical-Industry-Methodology-for-Portfolio-Sustainability-Assessments	Chemicals	not specified		1	0	1	0	1	Environmental	Eutrophication	Marine eutrophication potential (mol N eq)	1	ENV+SAF+SOC+ECO
2018	WBCSD	WBCSD2018	0	Guidance	International organisation	https://www.wbcsd.org/Programs/Circular-Economy/Resources/Chemical-Industry-Methodology-for-Portfolio-Sustainability-Assessments	Chemicals	not specified		1	0	1	0	1	Environmental	Eutrophication	Freshwater eutrophication potential (kg P eq)	1	ENV+SAF+SOC+ECO
2018	WBCSD	WBCSD2018	0	Guidance	International organisation	https://www.wbcsd.org/Programs/Circular-Economy/Resources/Chemical-Industry-Methodology-for-Portfolio-Sustainability-Assessments	Chemicals	not specified		1	0	1	0	1	Environmental	Stratospheric ozone Depletion	Ozone depletion potential (kg CFC-11)	1	ENV+SAF+SOC+ECO
2018	WBCSD	WBCSD2018	0	Guidance	International organisation	https://www.wbcsd.org/Programs/Circular-Economy/Resources/Chemical-Industry-Methodology-for-Portfolio-Sustainability-Assessments	Chemicals	not specified		1	0	1	0	1	Environmental	Particulate Matter	Particulate matter (PM 2.5eq)	1	ENV+SAF+SOC+ECO
2018	WBCSD	WBCSD2018	0	Guidance	International organisation	https://www.wbcsd.org/Programs/Circular-Economy/Resources/Chemical-Industry-Methodology-for-Portfolio-Sustainability-Assessments	Chemicals	not specified		1	0	1	0	1	Environmental	Photochemical Ozone Formation	POCP (kg of ethene-eq or Kg NMVOC or kg O3)	1	ENV+SAF+SOC+ECO
2018	WBCSD	WBCSD2018	0	Guidance	International organisation	https://www.wbcsd.org/Programs/Circular-Economy/Resources/Chemical-Industry-Methodology-for-Portfolio-Sustainability-Assessments	Chemicals	not specified		1	0	1	0	1	Environmental	Resources	Water depletion potential (m3eq)	1	ENV+SAF+SOC+ECO
2018	WBCSD	WBCSD2018	0	Guidance	International organisation	https://www.wbcsd.org/Programs/Circular-Economy/Resources/Chemical-Industry-Methodology-for-Portfolio-Sustainability-Assessments	Chemicals	not specified		1	0	1	0	1	Environmental	Resources	Land use (kg C deficit)	1	ENV+SAF+SOC+ECO
2018	WBCSD	WBCSD2018	0	Guidance	International organisation	https://www.wbcsd.org/Programs/Circular-Economy/Resources/Chemical-Industry-Methodology-for-Portfolio-Sustainability-Assessments	Chemicals	not specified		1	0	1	0	1	Environmental	Resources	Resource depletion potential (kg Sb eq)	1	ENV+SAF+SOC+ECO
2018	WBCSD	WBCSD2018	0	Guidance	International organisation	https://www.wbcsd.org/Programs/Circular-Economy/Resources/Chemical-Industry-Methodology-for-Portfolio-Sustainability-Assessments	Chemicals	not specified		1	0	1	0	1	Environmental	Resources	Resource use/depletion - fossil (MJ)	1	ENV+SAF+SOC+ECO
2018	WBCSD	WBCSD2018	0	Guidance	International organisation	https://www.wbcsd.org/Programs/Circular-Economy/Resources/Chemical-Industry-Methodology-for-Portfolio-Sustainability-Assessments	Chemicals	not specified		1	0	1	0	1	Environmental	Integrated Assessment	Ecosystems (species.yr)	1	ENV+SAF+SOC+ECO
2018	WBCSD	WBCSD2018	0	Guidance	International organisation	https://www.wbcsd.org/Programs/Circular-Economy/Resources/Chemical-Industry-Methodology-for-Portfolio-Sustainability-Assessments	Chemicals	not specified		1	0	1	0	1	Resources-, processing, and product- related	Resources: types, quantity, and efficiency considerations	Water consumption (m3)	1	ENV+SAF+SOC+ECO
2018	WBCSD	WBCSD2018	0	Guidance	International organisation	https://www.wbcsd.org/Programs/Circular-Economy/Resources/Chemical-Industry-Methodology-for-Portfolio-Sustainability-Assessments	Chemicals	not specified		1	0	1	0	1	Resources-, processing, and product- related	Energy	Energy efficiency (%)	1	ENV+SAF+SOC+ECO
2018	WBCSD	WBCSD2018	0	Guidance	International organisation	https://www.wbcsd.org/Programs/Circular-Economy/Resources/Chemical-Industry-Methodology-for-Portfolio-Sustainability-Assessments	Chemicals	not specified		1	0	1	0	1	Resources-, processing, and product- related	Energy	Cumulative energy demand (MJ)	1	ENV+SAF+SOC+ECO
2018	WBCSD	WBCSD2018	0	Guidance	International organisation	https://www.wbcsd.org/Programs/Circular-Economy/Resources/Chemical-Industry-Methodology-for-Portfolio-Sustainability-Assessments	Chemicals	not specified		1	0	1	0	1	Social	local community	Local employment	1	ENV+SAF+SOC+ECO
2018	WBCSD	WBCSD2018	0	Guidance	International organisation	https://www.wbcsd.org/Programs/Circular-Economy/Resources/Chemical-Industry-Methodology-for-Portfolio-Sustainability-Assessments	Chemicals	not specified		1	0	1	0	1	Social	consumer	Consumer health & safety	1	ENV+SAF+SOC+ECO
2018	WBCSD	WBCSD2018	0	Guidance	International organisation	https://www.wbcsd.org/Programs/Circular-Economy/Resources/Chemical-Industry-Methodology-for-Portfolio-Sustainability-Assessments	Chemicals	not specified		1	0	1	0	1	Social	consumer	Impact on basic needs of customers	1	ENV+SAF+SOC+ECO
2018	WBCSD	WBCSD2018	0	Guidance	International organisation	https://www.wbcsd.org/Programs/Circular-Economy/Resources/Chemical-Industry-Methodology-for-Portfolio-Sustainability-Assessments	Chemicals	not specified		1	0	1	0	1	Social	workers	Workers health & safety	1	ENV+SAF+SOC+ECO
2018	WBCSD	WBCSD2018	0	Guidance	International organisation	https://www.wbcsd.org/Programs/Circular-Economy/Resources/Chemical-Industry-Methodology-for-Portfolio-Sustainability-Assessments	Chemicals	not specified		1	0	1	0	1	Social	workers	Equal opportunities and discrimination	1	ENV+SAF+SOC+ECO
2018	WBCSD	WBCSD2018	0	Guidance	International organisation	https://www.wbcsd.org/Programs/Circular-Economy/Resources/Chemical-Industry-Methodology-for-Portfolio-Sustainability-Assessments	Chemicals	not specified		1	0	1	0	1	Social	local community	Access to basic needs	1	ENV+SAF+SOC+ECO
2018	WBCSD	WBCSD2018	0	Guidance	International organisation	https://www.wbcsd.org/Programs/Circular-Economy/Resources/Chemical-Industry-Methodology-for-Portfolio-Sustainability-Assessments	Chemicals	not specified		1	0	1	0	1	Social	workers	Child labour	1	ENV+SAF+SOC+ECO
2018	WBCSD	WBCSD2018	0	Guidance	International organisation	https://www.wbcsd.org/Programs/Circular-Economy/Resources/Chemical-Industry-Methodology-for-Portfolio-Sustainability-Assessments	Chemicals	not specified		1	0	1	0	1	Social	workers	Forced labour	1	ENV+SAF+SOC+ECO
2018	WBCSD	WBCSD2018	0	Guidance	International organisation	https://www.wbcsd.org/Programs/Circular-Economy/Resources/Chemical-Industry-Methodology-for-Portfolio-Sustainability-Assessments	Chemicals	not specified		1	0	1	0	1	Social	workers	Freedom of association and collective bargaining	1	ENV+SAF+SOC+ECO
2018	WBCSD	WBCSD2018	0	Guidance	International organisation	https://www.wbcsd.org/Programs/Circular-Economy/Resources/Chemical-Industry-Methodology-for-Portfolio-Sustainability-Assessments	Chemicals	not specified		1	0	1	0	1	Social	workers	Annual job trainings	1	ENV+SAF+SOC+ECO
2018	WBCSD	WBCSD2018	0	Guidance	International organisation	https://www.wbcsd.org/Programs/Circular-Economy/Resources/Chemical-Industry-Methodology-for-Portfolio-Sustainability-Assessments	Chemicals	not specified		1	0	1	0	1	Social	workers	Fair salary	1	ENV+SAF+SOC+ECO
2018	WBCSD	WBCSD2018	0	Guidance	International organisation	https://www.wbcsd.org/Programs/Circular-Economy/Resources/Chemical-Industry-Methodology-for-Portfolio-Sustainability-Assessments	Chemicals	not specified		1	0	1	0	1	Economic	Profitability	Minimum selling price	1	ENV+SAF+SOC+ECO
2018	WBCSD	WBCSD2018	0	Guidance	International organisation	https://www.wbcsd.org/Programs/Circular-Economy/Resources/Chemical-Industry-Methodology-for-Portfolio-Sustainability-Assessments	Chemicals	not specified		1	0	1	0	1	Economic	Profitability	Profitability (conceptual)	1	ENV+SAF+SOC+ECO
2019	Ahmed et al	Ahmed et al2019	0	Scientific article	Academia	https://doi.org/10.1155/2019/2850480	Materials	Building materials	Construction	0	0	1	1	0	Environmental	Climate Change	GWP 100 (kg CO₂eq)	1	ENV+SAF+SOC+ECO
2019	Ahmed et al	Ahmed et al2019	0	Scientific article	Academia	https://doi.org/10.1155/2019/2850480	Materials	Building materials	Construction	0	0	1	1	0	Social	local community	Public Welfare and Safety	1	ENV+SAF+SOC+ECO
2019	Ahmed et al	Ahmed et al2019	0	Scientific article	Academia	https://doi.org/10.1155/2019/2850480	Materials	Building materials	Construction	0	0	1	1	0	Resources-, processing, and product- related	Resources: types, quantity, and efficiency considerations	Material conservation	1	ENV+SAF+SOC+ECO
2019	Ahmed et al	Ahmed et al2019	0	Scientific article	Academia	https://doi.org/10.1155/2019/2850480	Materials	Building materials	Construction	0	0	1	1	0	Resources-, processing, and product- related	Resources: types, quantity, and efficiency considerations	Waste cleaning	1	ENV+SAF+SOC+ECO
2019	Ahmed et al	Ahmed et al2019	0	Scientific article	Academia	https://doi.org/10.1155/2019/2850480	Materials	Building materials	Construction	0	0	1	1	0	Resources-, processing, and product- related	Circularity	Waste utilization	1	ENV+SAF+SOC+ECO
2019	Ahmed et al	Ahmed et al2019	0	Scientific article	Academia	https://doi.org/10.1155/2019/2850480	Materials	Building materials	Construction	0	0	1	1	0	Resources-, processing, and product- related	Energy	Energy conservation	1	ENV+SAF+SOC+ECO
2019	Ahmed et al	Ahmed et al2019	0	Scientific article	Academia	https://doi.org/10.1155/2019/2850480	Materials	Building materials	Construction	0	0	1	1	0	Social	local community	Local employment	1	ENV+SAF+SOC+ECO
2019	Ahmed et al	Ahmed et al2019	0	Scientific article	Academia	https://doi.org/10.1155/2019/2850480	Materials	Building materials	Construction	0	0	1	1	0	Economic	Internal cost	(Total) production cost (€)	1	ENV+SAF+SOC+ECO
2019	AISE	AISE 2019	0	Certification	Certification schemes	https://www.aise.eu/our-activities/sustainable-cleaning-78.asp1	Chemicals	not specified	Cleaning and hygiene	0	0	0	0	1	Environmental	Air emission	Atmospheric CO2 emissions (g)	1	ENV+SAF+SOC
2019	AISE	AISE 2019	0	Certification	Certification schemes	https://www.aise.eu/our-activities/sustainable-cleaning-78.asp1	Chemicals	not specified	Cleaning and hygiene	0	0	0	0	1	Resources-, processing, and product- related	Resources: types, quantity, and efficiency considerations	Water consumption (m3)	1	ENV+SAF+SOC
2019	AISE	AISE 2019	0	Certification	Certification schemes	https://www.aise.eu/our-activities/sustainable-cleaning-78.asp1	Chemicals	not specified	Cleaning and hygiene	0	0	0	0	1	Resources-, processing, and product- related	Resources: types, quantity, and efficiency considerations	Amount of (solid/water) waste (kg or %)	1	ENV+SAF+SOC
2019	AISE	AISE 2019	0	Certification	Certification schemes	https://www.aise.eu/our-activities/sustainable-cleaning-78.asp1	Chemicals	not specified	Cleaning and hygiene	0	0	0	0	1	Resources-, processing, and product- related	Circularity	Recycled content (%)	1	ENV+SAF+SOC
2019	AISE	AISE 2019	0	Certification	Certification schemes	https://www.aise.eu/our-activities/sustainable-cleaning-78.asp1	Chemicals	not specified	Cleaning and hygiene	0	0	0	0	1	Resources-, processing, and product- related	Circularity	Recyclabile? (yes/no)	1	ENV+SAF+SOC
2019	AISE	AISE 2019	0	Certification	Certification schemes	https://www.aise.eu/our-activities/sustainable-cleaning-78.asp1	Chemicals	not specified	Cleaning and hygiene	0	0	0	0	1	Resources-, processing, and product- related	Energy	Energy consumption (kWh or MJ)	1	ENV+SAF+SOC
2019	AISE	AISE 2019	0	Certification	Certification schemes	https://www.aise.eu/our-activities/sustainable-cleaning-78.asp1	Chemicals	not specified	Cleaning and hygiene	0	0	0	0	1	Social	workers	Workers health & safety	1	ENV+SAF+SOC
2019	Barbosa et al	Barbosa et al2019	0	Scientific article	Academia	https://doi.org/10.4028/www.scientific.net/MSF.965.21	Chemicals	Solvents		1	0	0	0	0	Resources-, processing, and product- related	Energy	Energy consumption (kWh or MJ)	1	SAF+ECO
2019	Barbosa et al	Barbosa et al2019	0	Scientific article	Academia	https://doi.org/10.4028/www.scientific.net/MSF.965.21	Chemicals	Solvents		1	0	0	0	0	Economic	External cost	Life cycle cost	1	SAF+ECO
2019	Bystrzanowska et al	Bystrzanowska et al2019	0	Scientific article	Academia	https://pubs.acs.org/doi/10.1021/acssuschemeng.9b04230	Chemicals	Metals		1	0	1	1	1	Environmental	Climate Change	GWP 100 (kg CO₂eq)	1	ENV
2019	Bystrzanowska et al	Bystrzanowska et al2019	0	Scientific article	Academia	https://pubs.acs.org/doi/10.1021/acssuschemeng.9b04230	Chemicals	Metals		1	0	1	1	1	Environmental	Toxicity	Human toxicity – no cancer potential (CTUh)	1	ENV
2019	Bystrzanowska et al	Bystrzanowska et al2019	0	Scientific article	Academia	https://pubs.acs.org/doi/10.1021/acssuschemeng.9b04230	Chemicals	Metals		1	0	1	1	1	Environmental	Toxicity	Human toxicity – cancer potential (CTUh)	1	ENV
2019	Bystrzanowska et al	Bystrzanowska et al2019	0	Scientific article	Academia	https://pubs.acs.org/doi/10.1021/acssuschemeng.9b04230	Chemicals	Metals		1	0	1	1	1	Environmental	Acidification	Terrestrial acidification (kg SO2eq)	1	ENV
2019	Bystrzanowska et al	Bystrzanowska et al2019	0	Scientific article	Academia	https://pubs.acs.org/doi/10.1021/acssuschemeng.9b04230	Chemicals	Metals		1	0	1	1	1	Environmental	Eutrophication	Freshwater eutrophication potential (kg P eq)	1	ENV
2019	Calvo-Serrano	Calvo-Serrano 2019	1	Scientific article	Academia	https://doi.org/10.1021/acssuschemeng.8b06032	Chemicals	not specified		1	0	0	0	1	Environmental	Climate Change	GWP 100 (kg CO₂eq)	1	ENV+SAF
2019	Calvo-Serrano	Calvo-Serrano 2019	1	Scientific article	Academia	https://doi.org/10.1021/acssuschemeng.8b06032	Chemicals	not specified		1	0	0	0	1	Environmental	Resources	Eco-indicator99 depletion of resources [-]	1	ENV+SAF
2019	Calvo-Serrano	Calvo-Serrano 2019	1	Scientific article	Academia	https://doi.org/10.1021/acssuschemeng.8b06032	Chemicals	not specified		1	0	0	0	1	Environmental	Integrated Assessment	Eco-indicator99 ecosystems quality [-]	1	ENV+SAF
2019	Calvo-Serrano	Calvo-Serrano 2019	1	Scientific article	Academia	https://doi.org/10.1021/acssuschemeng.8b06032	Chemicals	not specified		1	0	0	0	1	Environmental	Integrated Assessment	Eco-indicator 99 total [-]	1	ENV+SAF
2019	Calvo-Serrano	Calvo-Serrano 2019	1	Scientific article	Academia	https://doi.org/10.1021/acssuschemeng.8b06032	Chemicals	not specified		1	0	0	0	1	Environmental	Integrated Assessment	Eco-Indicator99 Human health (DALY)	1	ENV+SAF
2019	Calvo-Serrano	Calvo-Serrano 2019	1	Scientific article	Academia	https://doi.org/10.1021/acssuschemeng.8b06032	Chemicals	not specified		1	0	0	0	1	Environmental	Water emission	Biological oxigen demand 5 (g)	1	ENV+SAF
2019	Calvo-Serrano	Calvo-Serrano 2019	1	Scientific article	Academia	https://doi.org/10.1021/acssuschemeng.8b06032	Chemicals	not specified		1	0	0	0	1	Environmental	Water emission	Chemical oxigen demand (g)	1	ENV+SAF
2019	Calvo-Serrano	Calvo-Serrano 2019	1	Scientific article	Academia	https://doi.org/10.1021/acssuschemeng.8b06032	Chemicals	not specified		1	0	0	0	1	Environmental	Water emission	Total organic carbon (kg)	1	ENV+SAF
2019	Calvo-Serrano	Calvo-Serrano 2019	1	Scientific article	Academia	https://doi.org/10.1021/acssuschemeng.8b06032	Chemicals	not specified		1	0	0	0	1	Resources-, processing, and product- related	Energy	Cumulative energy demand (MJ)	1	ENV+SAF
2019	Falqui et al	Falqui et al2019	0	Scientific article	Academia	https://doi.org/10.3390/app9173457	Materials	Building materials	Construction	0	0	1	0	0	Environmental	Climate Change	GWP 100 (kg CO₂eq)	1	ENV+SAF+SOC+ECO
2019	Falqui et al	Falqui et al2019	0	Scientific article	Academia	https://doi.org/10.3390/app9173457	Materials	Building materials	Construction	0	0	1	0	0	Social	local community	Public Welfare and Safety	1	ENV+SAF+SOC+ECO
2019	Falqui et al	Falqui et al2019	0	Scientific article	Academia	https://doi.org/10.3390/app9173457	Materials	Building materials	Construction	0	0	1	0	0	Resources-, processing, and product- related	Resources: types, quantity, and efficiency considerations	Material conservation	1	ENV+SAF+SOC+ECO
2019	Falqui et al	Falqui et al2019	0	Scientific article	Academia	https://doi.org/10.3390/app9173457	Materials	Building materials	Construction	0	0	1	0	0	Resources-, processing, and product- related	Resources: types, quantity, and efficiency considerations	Waste cleaning	1	ENV+SAF+SOC+ECO
2019	Falqui et al	Falqui et al2019	0	Scientific article	Academia	https://doi.org/10.3390/app9173457	Materials	Building materials	Construction	0	0	1	0	0	Resources-, processing, and product- related	Circularity	Waste utilization	1	ENV+SAF+SOC+ECO
2019	Falqui et al	Falqui et al2019	0	Scientific article	Academia	https://doi.org/10.3390/app9173457	Materials	Building materials	Construction	0	0	1	0	0	Resources-, processing, and product- related	Energy	Energy conservation	1	ENV+SAF+SOC+ECO
2019	Falqui et al	Falqui et al2019	0	Scientific article	Academia	https://doi.org/10.3390/app9173457	Materials	Building materials	Construction	0	0	1	0	0	Social	local community	Local employment	1	ENV+SAF+SOC+ECO
2019	Falqui et al	Falqui et al2019	0	Scientific article	Academia	https://doi.org/10.3390/app9173457	Materials	Building materials	Construction	0	0	1	0	0	Economic	Internal cost	(Total) production cost (€)	1	ENV+SAF+SOC+ECO
2019	Falqui et al	Falqui et al2019	0	Scientific article	Academia	https://doi.org/10.3390/app9173457	Materials	Building materials	Construction	0	0	1	0	0	Economic	Internal cost	Cost of maintenance/repairs	1	ENV+SAF+SOC+ECO
2019	GEC	GEC2019	0	Certification	NGOs	https://www.epa.gov/greenerproducts/electronic-product-environmental-assessment-tool-epeat	Products	not applicable	Electronics	1	0	0	0	1	Environmental	Climate Change	GWP 100 (kg CO₂eq)	1	ENV+SAF+ECO
2019	GEC	GEC2019	0	Certification	NGOs	https://www.epa.gov/greenerproducts/electronic-product-environmental-assessment-tool-epeat	Products	not applicable	Electronics	1	0	0	0	1	Environmental	Acidification	Acidification potential (molc H+ eq)	1	ENV+SAF+ECO
2019	GEC	GEC2019	0	Certification	NGOs	https://www.epa.gov/greenerproducts/electronic-product-environmental-assessment-tool-epeat	Products	not applicable	Electronics	1	0	0	0	1	Environmental	Eutrophication	Eutrophication potential (kg of phosphate )	1	ENV+SAF+ECO
2019	GEC	GEC2019	0	Certification	NGOs	https://www.epa.gov/greenerproducts/electronic-product-environmental-assessment-tool-epeat	Products	not applicable	Electronics	1	0	0	0	1	Environmental	Photochemical Ozone Formation	POCP (kg of ethene-eq or Kg NMVOC or kg O3)	1	ENV+SAF+ECO
2019	GEC	GEC2019	0	Certification	NGOs	https://www.epa.gov/greenerproducts/electronic-product-environmental-assessment-tool-epeat	Products	not applicable	Electronics	1	0	0	0	1	Resources-, processing, and product- related	Resources: types, quantity, and efficiency considerations	Water consumption (m3)	1	ENV+SAF+ECO
2019	GEC	GEC2019	0	Certification	NGOs	https://www.epa.gov/greenerproducts/electronic-product-environmental-assessment-tool-epeat	Products	not applicable	Electronics	1	0	0	0	1	Resources-, processing, and product- related	Resources: types, quantity, and efficiency considerations	Material intensity index (%)	1	ENV+SAF+ECO
2019	GEC	GEC2019	0	Certification	NGOs	https://www.epa.gov/greenerproducts/electronic-product-environmental-assessment-tool-epeat	Products	not applicable	Electronics	1	0	0	0	1	Economic	External cost	Waste (incl. emissions)/recycling treatment cost	1	ENV+SAF+ECO
2019	GEC	GEC2019	0	Certification	NGOs	https://www.epa.gov/greenerproducts/electronic-product-environmental-assessment-tool-epeat	Products	not applicable	Electronics	1	0	0	0	1	Resources-, processing, and product- related	Circularity	Recycled content (%)	1	ENV+SAF+ECO
2019	GEC	GEC2019	0	Certification	NGOs	https://www.epa.gov/greenerproducts/electronic-product-environmental-assessment-tool-epeat	Products	not applicable	Electronics	1	0	0	0	1	Resources-, processing, and product- related	Circularity	Recyclabile? (yes/no)	1	ENV+SAF+ECO
2019	GEC	GEC2019	0	Certification	NGOs	https://www.epa.gov/greenerproducts/electronic-product-environmental-assessment-tool-epeat	Products	not applicable	Electronics	1	0	0	0	1	Resources-, processing, and product- related	Energy	Energy efficiency (%)	1	ENV+SAF+ECO
2019	GEC	GEC2019	0	Certification	NGOs	https://www.epa.gov/greenerproducts/electronic-product-environmental-assessment-tool-epeat	Products	not applicable	Electronics	1	0	0	0	1	Economic	Internal cost	Purchase cost	1	ENV+SAF+ECO
2019	Gonzalez et al	Gonzalez et al2019	1	Scientific article	Academia	https://doi.org/10.1021/acssuschemeng.8b06038	Chemicals	Flame retardants	not specified	1	0	0	0	1	Resources-, processing, and product- related	Resources: types, quantity, and efficiency considerations	Amount of (solid/water) waste (kg or %)	1	SAF
2019	Gonzalez et al	Gonzalez et al2019	1	Scientific article	Academia	https://doi.org/10.1021/acssuschemeng.8b06038	Chemicals	Flame retardants	not specified	1	0	0	0	1	Resources-, processing, and product- related	Resources: types, quantity, and efficiency considerations	Reaction efficiency (%)	1	SAF
2019	Gonzalez et al	Gonzalez et al2019	1	Scientific article	Academia	https://doi.org/10.1021/acssuschemeng.8b06038	Chemicals	Flame retardants	not specified	1	0	0	0	1	Resources-, processing, and product- related	Resources: types, quantity, and efficiency considerations	Atom economy (%)	1	SAF
2019	Kokosa	Kokosa2019	0	Scientific article	Academia	https://doi.org/10.1016/j.trac.2019.05.012	Chemicals	Solvents	not specified	0	0	0	0	1	Economic	External cost	Waste (incl. emissions)/recycling treatment cost	1	SAF+ECO
2019	Kokosa	Kokosa2019	0	Scientific article	Academia	https://doi.org/10.1016/j.trac.2019.05.012	Chemicals	Solvents	not specified	0	0	0	0	1	Resources-, processing, and product- related	Circularity	Boiling temperature (°C)	1	SAF+ECO
2019	Kokosa	Kokosa2019	0	Scientific article	Academia	https://doi.org/10.1016/j.trac.2019.05.012	Chemicals	Solvents	not specified	0	0	0	0	1	Resources-, processing, and product- related	Circularity	Energy requirement for recycling (MJ/kg)	1	SAF+ECO
2019	Kokosa	Kokosa2019	0	Scientific article	Academia	https://doi.org/10.1016/j.trac.2019.05.012	Chemicals	Solvents	not specified	0	0	0	0	1	Economic	Internal cost	Purchase cost	1	SAF+ECO
2019	Oguzcan et al	Oguzcan et al2019	0	Scientific article	Academia	https://doi.org/10.1016/j.envpol.2019.07.113	Chemicals	not specified	not specified	1	0	0	0	1	Environmental	Resources	Resources depletion ($)	1	ENV
2019	Oguzcan et al	Oguzcan et al2019	0	Scientific article	Academia	https://doi.org/10.1016/j.envpol.2019.07.113	Chemicals	not specified	not specified	1	0	0	0	1	Environmental	Integrated Assessment	Ecosystems (species.yr)	1	ENV
2019	Oguzcan et al	Oguzcan et al2019	0	Scientific article	Academia	https://doi.org/10.1016/j.envpol.2019.07.113	Chemicals	not specified	not specified	1	0	0	0	1	Environmental	Integrated Assessment	Human Health (DALY)	1	ENV
2019	Ooi	Ooi2019	1	Scientific article	Academia	https://doi.org/10.1021/acs.iecr.9b01894	Chemicals	Solvents	not specified	0	0	1	0	1	Resources-, processing, and product- related	Resources: types, quantity, and efficiency considerations	Reaction efficiency (%)	1	SAF+ECO
2019	Ooi	Ooi2019	1	Scientific article	Academia	https://doi.org/10.1021/acs.iecr.9b01894	Chemicals	Solvents	not specified	0	0	1	0	1	Resources-, processing, and product- related	Circularity	Heat of vaporisation (MJ/kg)	1	SAF+ECO
2019	Ooi	Ooi2019	1	Scientific article	Academia	https://doi.org/10.1021/acs.iecr.9b01894	Chemicals	Solvents	not specified	0	0	1	0	1	Resources-, processing, and product- related	Energy	Energy consumption (kWh or MJ)	1	SAF+ECO
2019	Ooi	Ooi2019	1	Scientific article	Academia	https://doi.org/10.1021/acs.iecr.9b01894	Chemicals	Solvents	not specified	0	0	1	0	1	Economic	Internal cost	(Total) production cost (€)	1	SAF+ECO
2020	Balali et al	Balali et al2020	0	Scientific article	Academia	https://www.mdpi.com/2071-1050/12/22/9482	Materials	Building materials	Construction	0	0	1	0	0	Environmental	Toxicity	Indoor air quality	1	ENV+SAF+ECO
2020	Balali et al	Balali et al2020	0	Scientific article	Academia	https://www.mdpi.com/2071-1050/12/22/9482	Materials	Building materials	Construction	0	0	1	0	0	Resources-, processing, and product- related	Resources: types, quantity, and efficiency considerations	Water Efficiency	1	ENV+SAF+ECO
2020	Balali et al	Balali et al2020	0	Scientific article	Academia	https://www.mdpi.com/2071-1050/12/22/9482	Materials	Building materials	Construction	0	0	1	0	0	Resources-, processing, and product- related	Circularity	Recycled content (%)	1	ENV+SAF+ECO
2020	Balali et al	Balali et al2020	0	Scientific article	Academia	https://www.mdpi.com/2071-1050/12/22/9482	Materials	Building materials	Construction	0	0	1	0	0	Resources-, processing, and product- related	Circularity	Recyclabile? (yes/no)	1	ENV+SAF+ECO
2020	Balali et al	Balali et al2020	0	Scientific article	Academia	https://www.mdpi.com/2071-1050/12/22/9482	Materials	Building materials	Construction	0	0	1	0	0	Resources-, processing, and product- related	Circularity	Durability (years)	1	ENV+SAF+ECO
2020	Balali et al	Balali et al2020	0	Scientific article	Academia	https://www.mdpi.com/2071-1050/12/22/9482	Materials	Building materials	Construction	0	0	1	0	0	Resources-, processing, and product- related	Energy	Energy efficiency (%)	1	ENV+SAF+ECO
2020	Balali et al	Balali et al2020	0	Scientific article	Academia	https://www.mdpi.com/2071-1050/12/22/9482	Materials	Building materials	Construction	0	0	1	0	0	Economic	Other	Affordability	1	ENV+SAF+ECO
2020	Chavarrio et al	Chavarrio et al2020	0	Scientific article	Academia	https://doi.org/10.1002/jsde.12397	Chemicals	Solvents		0	0	0	0	0	Resources-, processing, and product- related	Circularity	Boiling temperature (°C)	1	SAF+ECO
2020	Chavarrio et al	Chavarrio et al2020	0	Scientific article	Academia	https://doi.org/10.1002/jsde.12397	Chemicals	Solvents		0	0	0	0	0	Resources-, processing, and product- related	Circularity	Purity of recovered solvent (%)	1	SAF+ECO
2020	Chavarrio et al	Chavarrio et al2020	0	Scientific article	Academia	https://doi.org/10.1002/jsde.12397	Chemicals	Solvents		0	0	0	0	0	Resources-, processing, and product- related	Circularity	Solvent selectivity [-]	1	SAF+ECO
2020	Chavarrio et al	Chavarrio et al2020	0	Scientific article	Academia	https://doi.org/10.1002/jsde.12397	Chemicals	Solvents		0	0	0	0	0	Resources-, processing, and product- related	Circularity	Yield of extraction (%)	1	SAF+ECO
2020	Chavarrio et al	Chavarrio et al2020	0	Scientific article	Academia	https://doi.org/10.1002/jsde.12397	Chemicals	Solvents		0	0	0	0	0	Resources-, processing, and product- related	Circularity	Heat of vaporisation (MJ/kg)	1	SAF+ECO
2020	Chavarrio et al	Chavarrio et al2020	0	Scientific article	Academia	https://doi.org/10.1002/jsde.12397	Chemicals	Solvents		0	0	0	0	0	Economic	Internal cost	Purchase cost	1	SAF+ECO
2020	EEA	EEA2020	0	Guidance	Government agencies	https://www.eea.europa.eu/downloads/c15a799795464cca8b7f26ee8e646781/1619090147/delivering-products-that-are-safe.pdf	Chemicals	not specified		1	0	0	0	1	Environmental	Climate Change	GWP 100 (kg CO₂eq)	1	ENV+SAF
2020	EEA	EEA2020	0	Guidance	Government agencies	https://www.eea.europa.eu/downloads/c15a799795464cca8b7f26ee8e646781/1619090147/delivering-products-that-are-safe.pdf	Chemicals	not specified		1	0	0	0	1	Environmental	Integrated Assessment	Ecosystems damage (conceptual)	1	ENV+SAF
2020	EEA	EEA2020	0	Guidance	Government agencies	https://www.eea.europa.eu/downloads/c15a799795464cca8b7f26ee8e646781/1619090147/delivering-products-that-are-safe.pdf	Chemicals	not specified		1	0	0	0	1	Resources-, processing, and product- related	Circularity	Recyclability/circularity (conceptual)	1	ENV+SAF
2020	EEA	EEA2020	0	Guidance	Government agencies	https://www.eea.europa.eu/downloads/c15a799795464cca8b7f26ee8e646781/1619090147/delivering-products-that-are-safe.pdf	Chemicals	not specified		1	0	0	0	1	Resources-, processing, and product- related	Energy	Energy consumption (kWh or MJ)	1	ENV+SAF
2020	EU Proposal 2020/0353 concerning batteries and waste batteries, repealing Directive 2006/66/EC and amending	EU Proposal 2020/0353 concerning batteries and waste batteries, repealing Directive 2006/66/EC and amending 2020	0	Regulation	EU legislations	https://eur-le1.europa.eu/legal-content/EN/T1T/?uri=CELE1%3A52020PC0798	Products		Energy	1	0	0	0	1	Environmental	Climate Change	GWP 100 (kg CO₂eq)	1	ENV+SAF+SOC
2020	EU Proposal 2020/0353 concerning batteries and waste batteries, repealing Directive 2006/66/EC and amending	EU Proposal 2020/0353 concerning batteries and waste batteries, repealing Directive 2006/66/EC and amending 2020	0	Regulation	EU legislations	https://eur-le1.europa.eu/legal-content/EN/T1T/?uri=CELE1%3A52020PC0798	Products		Energy	1	0	0	0	1	Resources-, processing, and product- related	Circularity	Recycled content (%)	1	ENV+SAF+SOC
2020	EU Proposal 2020/0353 concerning batteries and waste batteries, repealing Directive 2006/66/EC and amending	EU Proposal 2020/0353 concerning batteries and waste batteries, repealing Directive 2006/66/EC and amending 2020	0	Regulation	EU legislations	https://eur-le1.europa.eu/legal-content/EN/T1T/?uri=CELE1%3A52020PC0798	Products		Energy	1	0	0	0	1	Resources-, processing, and product- related	Circularity	Recyclabile? (yes/no)	1	ENV+SAF+SOC
2020	EU Proposal 2020/0353 concerning batteries and waste batteries, repealing Directive 2006/66/EC and amending	EU Proposal 2020/0353 concerning batteries and waste batteries, repealing Directive 2006/66/EC and amending 2020	0	Regulation	EU legislations	https://eur-le1.europa.eu/legal-content/EN/T1T/?uri=CELE1%3A52020PC0798	Products		Energy	1	0	0	0	1	Resources-, processing, and product- related	Circularity	Disassembly/reparability design (conceptual)	1	ENV+SAF+SOC
2020	EU Proposal 2020/0353 concerning batteries and waste batteries, repealing Directive 2006/66/EC and amending	EU Proposal 2020/0353 concerning batteries and waste batteries, repealing Directive 2006/66/EC and amending 2020	0	Regulation	EU legislations	https://eur-le1.europa.eu/legal-content/EN/T1T/?uri=CELE1%3A52020PC0798	Products		Energy	1	0	0	0	1	Resources-, processing, and product- related	Circularity	Durability (years)	1	ENV+SAF+SOC
2020	EU Proposal 2020/0353 concerning batteries and waste batteries, repealing Directive 2006/66/EC and amending	EU Proposal 2020/0353 concerning batteries and waste batteries, repealing Directive 2006/66/EC and amending 2020	0	Regulation	EU legislations	https://eur-le1.europa.eu/legal-content/EN/T1T/?uri=CELE1%3A52020PC0798	Products		Energy	1	0	0	0	1	Resources-, processing, and product- related	Circularity	Recycling efficiency/recovery rate (%)	1	ENV+SAF+SOC
2020	EU Proposal 2020/0353 concerning batteries and waste batteries, repealing Directive 2006/66/EC and amending	EU Proposal 2020/0353 concerning batteries and waste batteries, repealing Directive 2006/66/EC and amending 2020	0	Regulation	EU legislations	https://eur-le1.europa.eu/legal-content/EN/T1T/?uri=CELE1%3A52020PC0798	Products		Energy	1	0	0	0	1	Social	value chain actors	Tracking capacity	1	ENV+SAF+SOC
2020	EU Proposal 2020/852 Sustainable Finance	EU Proposal 2020/852 Sustainable Finance 2020	0	Regulation	EU legislations	https://eur-le1.europa.eu/legal-content/EN/T1T/?uri=CELE1%3A32020R0852	Products		Financial	0	1	0	0	1	Environmental	Climate Change	GWP 100 (kg CO₂eq)	1	ENV+SAF+ECO
2020	EU Proposal 2020/852 Sustainable Finance	EU Proposal 2020/852 Sustainable Finance 2020	0	Regulation	EU legislations	https://eur-le1.europa.eu/legal-content/EN/T1T/?uri=CELE1%3A32020R0852	Products		Financial	0	1	0	0	1	Environmental	Integrated Assessment	Biodiversity protection (conceptual)	1	ENV+SAF+ECO
2020	EU Proposal 2020/852 Sustainable Finance	EU Proposal 2020/852 Sustainable Finance 2020	0	Regulation	EU legislations	https://eur-le1.europa.eu/legal-content/EN/T1T/?uri=CELE1%3A32020R0852	Products		Financial	0	1	0	0	1	Resources-, processing, and product- related	Circularity	Recyclability/circularity (conceptual)	1	ENV+SAF+ECO
2020	EU Proposal 2020/852 Sustainable Finance	EU Proposal 2020/852 Sustainable Finance 2020	0	Regulation	EU legislations	https://eur-le1.europa.eu/legal-content/EN/T1T/?uri=CELE1%3A32020R0852	Products		Financial	0	1	0	0	1	Resources-, processing, and product- related	Circularity	Durability (years)	1	ENV+SAF+ECO
2020	EU Proposal 2020/852 Sustainable Finance	EU Proposal 2020/852 Sustainable Finance 2020	0	Regulation	EU legislations	https://eur-le1.europa.eu/legal-content/EN/T1T/?uri=CELE1%3A32020R0852	Products		Financial	0	1	0	0	1	Resources-, processing, and product- related	Energy	Energy efficiency (%)	1	ENV+SAF+ECO
2020	EU Proposal 2020/852 Sustainable Finance	EU Proposal 2020/852 Sustainable Finance 2020	0	Regulation	EU legislations	https://eur-le1.europa.eu/legal-content/EN/T1T/?uri=CELE1%3A32020R0852	Products		Financial	0	1	0	0	1	Economic	Profitability	Profitability (conceptual)	1	ENV+SAF+ECO
2020	EVONIK	EVONIK2020	0	Certification	Industry	https://corporate.evonik.com/Downloads/Corporate/BPK/Evonik_Sustainability_Report_2020.pdf	Chemicals	not specified		1	0	0	0	1	Environmental	Climate Change	GWP 100 (kg CO₂eq)	1	ENV+SAF+SOC+ECO
2020	EVONIK	EVONIK2020	0	Certification	Industry	https://corporate.evonik.com/Downloads/Corporate/BPK/Evonik_Sustainability_Report_2020.pdf	Chemicals	not specified		1	0	0	0	1	Environmental	Water emission	Chemical oxigen demand (g)	1	ENV+SAF+SOC+ECO
2020	EVONIK	EVONIK2020	0	Certification	Industry	https://corporate.evonik.com/Downloads/Corporate/BPK/Evonik_Sustainability_Report_2020.pdf	Chemicals	not specified		1	0	0	0	1	Resources-, processing, and product- related	Resources: types, quantity, and efficiency considerations	Water consumption (m3)	1	ENV+SAF+SOC+ECO
2020	EVONIK	EVONIK2020	0	Certification	Industry	https://corporate.evonik.com/Downloads/Corporate/BPK/Evonik_Sustainability_Report_2020.pdf	Chemicals	not specified		1	0	0	0	1	Resources-, processing, and product- related	Resources: types, quantity, and efficiency considerations	Amount of (solid/water) waste (kg or %)	1	ENV+SAF+SOC+ECO
2020	EVONIK	EVONIK2020	0	Certification	Industry	https://corporate.evonik.com/Downloads/Corporate/BPK/Evonik_Sustainability_Report_2020.pdf	Chemicals	not specified		1	0	0	0	1	Social	workers	Rate of injuries	1	ENV+SAF+SOC+ECO
2020	EVONIK	EVONIK2020	0	Certification	Industry	https://corporate.evonik.com/Downloads/Corporate/BPK/Evonik_Sustainability_Report_2020.pdf	Chemicals	not specified		1	0	0	0	1	Social	workers	Equal opportunities and discrimination	1	ENV+SAF+SOC+ECO
2020	EVONIK	EVONIK2020	0	Certification	Industry	https://corporate.evonik.com/Downloads/Corporate/BPK/Evonik_Sustainability_Report_2020.pdf	Chemicals	not specified		1	0	0	0	1	Social	workers	Working hours (e.g. maximum)/work-file balance	1	ENV+SAF+SOC+ECO
2020	EVONIK	EVONIK2020	0	Certification	Industry	https://corporate.evonik.com/Downloads/Corporate/BPK/Evonik_Sustainability_Report_2020.pdf	Chemicals	not specified		1	0	0	0	1	Economic	Profitability	Financial profit (€)	1	ENV+SAF+SOC+ECO
2020	Fantke et al	Fantke et al2020	0	Scientific article	Academia	https://doi.org/10.1039/d0gc01544j	Chemicals	not specified		1	0	0	0	1	Environmental	Climate Change	GWP 100 (kg CO₂eq)	1	ENV+SOC
2020	Fantke et al	Fantke et al2020	0	Scientific article	Academia	https://doi.org/10.1039/d0gc01544j	Chemicals	not specified		1	0	0	0	1	Environmental	Climate Change	Climate change damage (DALY)	1	ENV+SOC
2020	Fantke et al	Fantke et al2020	0	Scientific article	Academia	https://doi.org/10.1039/d0gc01544j	Chemicals	not specified		1	0	0	0	1	Environmental	Toxicity	Ecotoxicity damage (PDF m3 d)	1	ENV+SOC
2020	Fantke et al	Fantke et al2020	0	Scientific article	Academia	https://doi.org/10.1039/d0gc01544j	Chemicals	not specified		1	0	0	0	1	Environmental	Particulate Matter	Particulate matter (PM 2.5eq)	1	ENV+SOC
2020	Fantke et al	Fantke et al2020	0	Scientific article	Academia	https://doi.org/10.1039/d0gc01544j	Chemicals	not specified		1	0	0	0	1	Environmental	Integrated Assessment	Human Health (DALY)	1	ENV+SOC
2020	Fantke et al	Fantke et al2020	0	Scientific article	Academia	https://doi.org/10.1039/d0gc01544j	Chemicals	not specified		1	0	0	0	1	Environmental	Air emission	Fine particulate matter (mg PM 2.5)	1	ENV+SOC
2020	Fantke et al	Fantke et al2020	0	Scientific article	Academia	https://doi.org/10.1039/d0gc01544j	Chemicals	not specified		1	0	0	0	1	Social	workers	Time of exposure	1	ENV+SOC
2020	Garas et al	Garas et al2020	1	Scientific article	Academia	https://www.tandfonline.com/doi/full/10.1080/19397038.2021.1963004	Materials	Building materials		0	0	1	0	0	Environmental	Climate Change	GWP 100 (kg CO₂eq)	1	ENV+SAF+SOC+ECO
2020	Garas et al	Garas et al2020	1	Scientific article	Academia	https://www.tandfonline.com/doi/full/10.1080/19397038.2021.1963004	Materials	Building materials		0	0	1	0	0	Environmental	Toxicity	Air pollution (DALYs) - airpollution and acidification	1	ENV+SAF+SOC+ECO
2020	Garas et al	Garas et al2020	1	Scientific article	Academia	https://www.tandfonline.com/doi/full/10.1080/19397038.2021.1963004	Materials	Building materials		0	0	1	0	0	Resources-, processing, and product- related	Resources: types, quantity, and efficiency considerations	Renewability of resources	1	ENV+SAF+SOC+ECO
2020	Garas et al	Garas et al2020	1	Scientific article	Academia	https://www.tandfonline.com/doi/full/10.1080/19397038.2021.1963004	Materials	Building materials		0	0	1	0	0	Resources-, processing, and product- related	Resources: types, quantity, and efficiency considerations	Raw materails consumption (Kg/ton)	1	ENV+SAF+SOC+ECO
2020	Garas et al	Garas et al2020	1	Scientific article	Academia	https://www.tandfonline.com/doi/full/10.1080/19397038.2021.1963004	Materials	Building materials		0	0	1	0	0	Resources-, processing, and product- related	Resources: types, quantity, and efficiency considerations	Solid waste (kg/ton)	1	ENV+SAF+SOC+ECO
2020	Garas et al	Garas et al2020	1	Scientific article	Academia	https://www.tandfonline.com/doi/full/10.1080/19397038.2021.1963004	Materials	Building materials		0	0	1	0	0	Resources-, processing, and product- related	Circularity	Recyclability/circularity (conceptual)	1	ENV+SAF+SOC+ECO
2020	Garas et al	Garas et al2020	1	Scientific article	Academia	https://www.tandfonline.com/doi/full/10.1080/19397038.2021.1963004	Materials	Building materials		0	0	1	0	0	Resources-, processing, and product- related	Energy	Energy consumption (kWh or MJ)	1	ENV+SAF+SOC+ECO
2020	Garas et al	Garas et al2020	1	Scientific article	Academia	https://www.tandfonline.com/doi/full/10.1080/19397038.2021.1963004	Materials	Building materials		0	0	1	0	0	Social	local community	Local employment	1	ENV+SAF+SOC+ECO
2020	Garas et al	Garas et al2020	1	Scientific article	Academia	https://www.tandfonline.com/doi/full/10.1080/19397038.2021.1963004	Materials	Building materials		0	0	1	0	0	Social	local community	Human Satisfaction (appropriateness for culture and level of noise and vibration)	1	ENV+SAF+SOC+ECO
2020	Garas et al	Garas et al2020	1	Scientific article	Academia	https://www.tandfonline.com/doi/full/10.1080/19397038.2021.1963004	Materials	Building materials		0	0	1	0	0	Economic	Internal cost	(Total) production cost (€)	1	ENV+SAF+SOC+ECO
2020	Linke et al	Linke et al2020	1	Scientific article	Academia	https://doi.org/10.1021/acssuschemeng.0c02611	Chemicals	Solvents		0	0	0	1	1	Resources-, processing, and product- related	Circularity	Boiling temperature (°C)	1	ENV
2020	Linke et al	Linke et al2020	1	Scientific article	Academia	https://doi.org/10.1021/acssuschemeng.0c02611	Chemicals	Solvents		0	0	0	1	1	Resources-, processing, and product- related	Biodegradability	Biodegradablity (not specified)	1	ENV
2020	Rincon et al	Rincon et al2020	0	Scientific article	Academia	https://doi.org/10.1016/B978-0-12-818376-2.00001-6	Chemicals	not specified		1	0	0	0	1	Environmental	Climate Change	GWP 100 (kg CO₂eq)	1	ENV+SAF+ECO
2020	Rincon et al	Rincon et al2020	0	Scientific article	Academia	https://doi.org/10.1016/B978-0-12-818376-2.00001-6	Chemicals	not specified		1	0	0	0	1	Environmental	Acidification	Acidification potential (molc H+ eq)	1	ENV+SAF+ECO
2020	Rincon et al	Rincon et al2020	0	Scientific article	Academia	https://doi.org/10.1016/B978-0-12-818376-2.00001-6	Chemicals	not specified		1	0	0	0	1	Environmental	Stratospheric ozone Depletion	Ozone depletion potential (kg CFC-11)	1	ENV+SAF+ECO
2020	Rincon et al	Rincon et al2020	0	Scientific article	Academia	https://doi.org/10.1016/B978-0-12-818376-2.00001-6	Chemicals	not specified		1	0	0	0	1	Environmental	Photochemical Ozone Formation	POCP (kg of ethene-eq or Kg NMVOC or kg O3)	1	ENV+SAF+ECO
2020	Rincon et al	Rincon et al2020	0	Scientific article	Academia	https://doi.org/10.1016/B978-0-12-818376-2.00001-6	Chemicals	not specified		1	0	0	0	1	Resources-, processing, and product- related	Resources: types, quantity, and efficiency considerations	Renewable or fossil? (yes/no)	1	ENV+SAF+ECO
2020	Rincon et al	Rincon et al2020	0	Scientific article	Academia	https://doi.org/10.1016/B978-0-12-818376-2.00001-6	Chemicals	not specified		1	0	0	0	1	Resources-, processing, and product- related	Biodegradability	Biodegradability requirement (EU law specification)	1	ENV+SAF+ECO
2020	Rincon et al	Rincon et al2020	0	Scientific article	Academia	https://doi.org/10.1016/B978-0-12-818376-2.00001-6	Chemicals	not specified		1	0	0	0	1	Economic	Profitability	Added value (€)	1	ENV+SAF+ECO
2020	Rincon et al	Rincon et al2020	0	Scientific article	Academia	https://doi.org/10.1016/B978-0-12-818376-2.00001-6	Chemicals	not specified		1	0	0	0	1	Economic	Profitability	Normalised added value [-]	1	ENV+SAF+ECO
2020	Saeli et al	Saeli et al2020	1	Scientific article	Academia	Sustainability | Free Full-Text | Selection of Novel Geopolymeric Mortars for Sustainable Construction Applications Using Fuzzy Topsis Approach (mdpi.com)	Materials	Building materials	Construction	1	0	1	1	0	Environmental	Climate Change	GWP 100 (kg CO₂eq)	1	ENV+SAF
2020	Saeli et al	Saeli et al2020	1	Scientific article	Academia	Sustainability | Free Full-Text | Selection of Novel Geopolymeric Mortars for Sustainable Construction Applications Using Fuzzy Topsis Approach (mdpi.com)	Materials	Building materials	Construction	1	0	1	1	0	Resources-, processing, and product- related	Energy	Cumulative energy demand (MJ)	1	ENV+SAF
2020	Saeli et al	Saeli et al2020	1	Scientific article	Academia	Sustainability | Free Full-Text | Selection of Novel Geopolymeric Mortars for Sustainable Construction Applications Using Fuzzy Topsis Approach (mdpi.com)	Materials	Building materials	Construction	1	0	1	1	0	Economic	Other	Waste management cost	1	ENV+SAF
2020	SCP	SCP2020	0	Guidance	Government agencies	https://dtsc.ca.gov/scp/alternatives-analysis-guide-version-1-0-downloads/	Products	not specified		1	0	1	1	1	Environmental	Climate Change	GWP 100 (kg CO₂eq)	1	ENV+ECO
2020	SCP	SCP2020	0	Guidance	Government agencies	https://dtsc.ca.gov/scp/alternatives-analysis-guide-version-1-0-downloads/	Products	not specified		1	0	1	1	1	Environmental	Toxicity	Terrestrial ecotoxicity (g C6H4CI2-eq)	1	ENV+ECO
2020	SCP	SCP2020	0	Guidance	Government agencies	https://dtsc.ca.gov/scp/alternatives-analysis-guide-version-1-0-downloads/	Products	not specified		1	0	1	1	1	Environmental	Acidification	Acidification potential (molc H+ eq)	1	ENV+ECO
2020	SCP	SCP2020	0	Guidance	Government agencies	https://dtsc.ca.gov/scp/alternatives-analysis-guide-version-1-0-downloads/	Products	not specified		1	0	1	1	1	Environmental	Eutrophication	Eutrophication potential (kg of phosphate )	1	ENV+ECO
2020	SCP	SCP2020	0	Guidance	Government agencies	https://dtsc.ca.gov/scp/alternatives-analysis-guide-version-1-0-downloads/	Products	not specified		1	0	1	1	1	Environmental	Stratospheric ozone Depletion	Ozone depletion potential (kg CFC-11)	1	ENV+ECO
2020	SCP	SCP2020	0	Guidance	Government agencies	https://dtsc.ca.gov/scp/alternatives-analysis-guide-version-1-0-downloads/	Products	not specified		1	0	1	1	1	Environmental	Particulate Matter	Particulate matter (PM 2.5eq)	1	ENV+ECO
2020	SCP	SCP2020	0	Guidance	Government agencies	https://dtsc.ca.gov/scp/alternatives-analysis-guide-version-1-0-downloads/	Products	not specified		1	0	1	1	1	Environmental	Photochemical Ozone Formation	POCP (kg of ethene-eq or Kg NMVOC or kg O3)	1	ENV+ECO
2020	SCP	SCP2020	0	Guidance	Government agencies	https://dtsc.ca.gov/scp/alternatives-analysis-guide-version-1-0-downloads/	Products	not specified		1	0	1	1	1	Environmental	Resources	Water depletion potential (m3eq)	1	ENV+ECO
2020	SCP	SCP2020	0	Guidance	Government agencies	https://dtsc.ca.gov/scp/alternatives-analysis-guide-version-1-0-downloads/	Products	not specified		1	0	1	1	1	Environmental	Resources	Land occupation (m2a crop eq)	1	ENV+ECO
2020	SCP	SCP2020	0	Guidance	Government agencies	https://dtsc.ca.gov/scp/alternatives-analysis-guide-version-1-0-downloads/	Products	not specified		1	0	1	1	1	Economic	value chain actors	Willingness to pay	1	ENV+ECO
2020	SCP	SCP2020	0	Guidance	Government agencies	https://dtsc.ca.gov/scp/alternatives-analysis-guide-version-1-0-downloads/	Products	not specified		1	0	1	1	1	Economic	External cost	Externality cost (€)	1	ENV+ECO
2020	SCP	SCP2020	0	Guidance	Government agencies	https://dtsc.ca.gov/scp/alternatives-analysis-guide-version-1-0-downloads/	Products	not specified		1	0	1	1	1	Economic	Internal cost	(Total) production cost (€)	1	ENV+ECO
2020	Segger and Kappenthuler	Segger and Kappenthuler 2020	1	Scientific article	Academia	https://www.sciencedirect.com/science/article/pii/S258923471830023X	Materials	Building materials	Construction	0	0	1	0	0	Environmental	Resources	Damage to Resources (Recipe)	1	ENV+SAF+ECO
2020	Segger and Kappenthuler	Segger and Kappenthuler 2020	1	Scientific article	Academia	https://www.sciencedirect.com/science/article/pii/S258923471830023X	Materials	Building materials	Construction	0	0	1	0	0	Environmental	Integrated Assessment	Ecosystems (species.yr)	1	ENV+SAF+ECO
2020	Segger and Kappenthuler	Segger and Kappenthuler 2020	1	Scientific article	Academia	https://www.sciencedirect.com/science/article/pii/S258923471830023X	Materials	Building materials	Construction	0	0	1	0	0	Environmental	Integrated Assessment	Human Health (DALY)	1	ENV+SAF+ECO
2020	Segger and Kappenthuler	Segger and Kappenthuler 2020	1	Scientific article	Academia	https://www.sciencedirect.com/science/article/pii/S258923471830023X	Materials	Building materials	Construction	0	0	1	0	0	Resources-, processing, and product- related	Resources: types, quantity, and efficiency considerations	Renewability of resources	1	ENV+SAF+ECO
2020	Segger and Kappenthuler	Segger and Kappenthuler 2020	1	Scientific article	Academia	https://www.sciencedirect.com/science/article/pii/S258923471830023X	Materials	Building materials	Construction	0	0	1	0	0	Resources-, processing, and product- related	Circularity	Durability (years)	1	ENV+SAF+ECO
2020	Segger and Kappenthuler	Segger and Kappenthuler 2020	1	Scientific article	Academia	https://www.sciencedirect.com/science/article/pii/S258923471830023X	Materials	Building materials	Construction	0	0	1	0	0	Resources-, processing, and product- related	Circularity	Recycling efficiency/recovery rate (%)	1	ENV+SAF+ECO
2020	Segger and Kappenthuler	Segger and Kappenthuler 2020	1	Scientific article	Academia	https://www.sciencedirect.com/science/article/pii/S258923471830023X	Materials	Building materials	Construction	0	0	1	0	0	Economic	Other	Reaction and resistance to fire	1	ENV+SAF+ECO
2020	Segger and Kappenthuler	Segger and Kappenthuler 2020	1	Scientific article	Academia	https://www.sciencedirect.com/science/article/pii/S258923471830023X	Materials	Building materials	Construction	0	0	1	0	0	Economic	Internal cost	Purchase cost	1	ENV+SAF+ECO
2020	Segger and Kappenthuler	Segger and Kappenthuler 2020	1	Scientific article	Academia	https://www.sciencedirect.com/science/article/pii/S258923471830023X	Materials	Building materials	Construction	0	0	1	0	0	Economic	Other	Waste management cost	1	ENV+SAF+ECO
2020	Segger and Kappenthuler	Segger and Kappenthuler 2020	1	Scientific article	Academia	https://www.sciencedirect.com/science/article/pii/S258923471830023X	Materials	Building materials	Construction	0	0	1	0	0	Economic	Internal cost	(Total) production cost (€)	1	ENV+SAF+ECO
2020	Segger and Kappenthuler	Segger and Kappenthuler 2020	1	Scientific article	Academia	https://www.sciencedirect.com/science/article/pii/S258923471830023X	Materials	Building materials	Construction	0	0	1	0	0	Economic	Other	Projected price	1	ENV+SAF+ECO
2020	Segger and Kappenthuler	Segger and Kappenthuler 2020	1	Scientific article	Academia	https://www.sciencedirect.com/science/article/pii/S258923471830023X	Materials	Building materials	Construction	0	0	1	0	0	Economic	Internal cost	Cost of maintenance/repairs	1	ENV+SAF+ECO
2020	Segger and Kappenthuler	Segger and Kappenthuler 2020	1	Scientific article	Academia	https://www.sciencedirect.com/science/article/pii/S258923471830023X	Materials	Building materials	Construction	0	0	1	0	0	Economic	Other	Performance uncertainty (material never used in a context)	1	ENV+SAF+ECO
2020	Solvay 2020	Solvay 20202020	0	Tool	Industry	https://www.solvay.com/en/press-release/2030-sustainability-program-solvay-one-planet	Chemicals	not specified		1	0	0	0	1	Environmental	Climate Change	GWP 100 (kg CO₂eq)	1	ENV+SAF+SOC
2020	Solvay 2020	Solvay 20202020	0	Tool	Industry	https://www.solvay.com/en/press-release/2030-sustainability-program-solvay-one-planet	Chemicals	not specified		1	0	0	0	1	Environmental	Integrated Assessment	Biodiversity protection (conceptual)	1	ENV+SAF+SOC
2020	Solvay 2020	Solvay 20202020	0	Tool	Industry	https://www.solvay.com/en/press-release/2030-sustainability-program-solvay-one-planet	Chemicals	not specified		1	0	0	0	1	Resources-, processing, and product- related	Resources: types, quantity, and efficiency considerations	Renewable or fossil? (yes/no)	1	ENV+SAF+SOC
2020	Solvay 2020	Solvay 20202020	0	Tool	Industry	https://www.solvay.com/en/press-release/2030-sustainability-program-solvay-one-planet	Chemicals	not specified		1	0	0	0	1	Resources-, processing, and product- related	Resources: types, quantity, and efficiency considerations	Water consumption (m3)	1	ENV+SAF+SOC
2020	Solvay 2020	Solvay 20202020	0	Tool	Industry	https://www.solvay.com/en/press-release/2030-sustainability-program-solvay-one-planet	Chemicals	not specified		1	0	0	0	1	Resources-, processing, and product- related	Resources: types, quantity, and efficiency considerations	Amount of (solid/water) waste (kg or %)	1	ENV+SAF+SOC
2020	Solvay 2020	Solvay 20202020	0	Tool	Industry	https://www.solvay.com/en/press-release/2030-sustainability-program-solvay-one-planet	Chemicals	not specified		1	0	0	0	1	Social	workers	Equal opportunities and discrimination	1	ENV+SAF+SOC
2020	Streimikiene at al	Streimikiene at al2020	0	Scientific article	Academia	Uncertain multi-criteria sustainability assessment of green building insulation materials - ScienceDirect	Materials	Building materials	Construction	1	0	1	1	0	Environmental	Climate Change	GWP 100 (kg CO₂eq)	1	ENV
2020	Streimikiene at al	Streimikiene at al2020	0	Scientific article	Academia	Uncertain multi-criteria sustainability assessment of green building insulation materials - ScienceDirect	Materials	Building materials	Construction	1	0	1	1	0	Environmental	Toxicity	Human toxicity (not specified)	1	ENV
2020	Venturi et al	Venturi et al2020	0	Scientific article	Academia	https://doi.org/10.1021/acssuschemeng.0c05587	Chemicals	Solvents		0	0	0	0	1	Resources-, processing, and product- related	Circularity	Boiling temperature (°C)	1	SAF+ECO
2020	Venturi et al	Venturi et al2020	0	Scientific article	Academia	https://doi.org/10.1021/acssuschemeng.0c05587	Chemicals	Solvents		0	0	0	0	1	Resources-, processing, and product- related	Biodegradability	Biodegradability requirement (EU law specification)	1	SAF+ECO
2020	Venturi et al	Venturi et al2020	0	Scientific article	Academia	https://doi.org/10.1021/acssuschemeng.0c05587	Chemicals	Solvents		0	0	0	0	1	Economic	Internal cost	Purchase cost	1	SAF+ECO
2020	Wakeel et al	Wakeel et al2020	0	Scientific article	Academia	https://journals.sagepub.com/doi/10.1177/1464420720966347	Materials	Vehicle (carrier)	Automotive	0	0	1	0	0	Resources-, processing, and product- related	Energy	Recycling Energy	1	SAF+ECO
2020	Wakeel et al	Wakeel et al2020	0	Scientific article	Academia	https://journals.sagepub.com/doi/10.1177/1464420720966347	Materials	Vehicle (carrier)	Automotive	0	0	1	0	0	Economic	Internal cost	Product cost	1	SAF+ECO
2020	Wang and Hellweg	Wang and Hellweg2020	1	Scientific article	Academia	https://pubs.acs.org/doi/10.1021/acssuschemeng.1c00243	Chemicals	not specified		1	0	0	0	1	Environmental	Climate Change	Climate change (conceptual)	1	ENV+SAF
2020	Wang and Hellweg	Wang and Hellweg2020	1	Scientific article	Academia	https://pubs.acs.org/doi/10.1021/acssuschemeng.1c00243	Chemicals	not specified		1	0	0	0	1	Resources-, processing, and product- related	Circularity	Recyclability/circularity (conceptual)	1	ENV+SAF
2020	Wang and Hellweg	Wang and Hellweg2020	1	Scientific article	Academia	https://pubs.acs.org/doi/10.1021/acssuschemeng.1c00243	Chemicals	not specified		1	0	0	0	1	Resources-, processing, and product- related	Circularity	Recycling efficiency/recovery rate (%)	1	ENV+SAF
2020	Wang and Hellweg	Wang and Hellweg2020	1	Scientific article	Academia	https://pubs.acs.org/doi/10.1021/acssuschemeng.1c00243	Chemicals	not specified		1	0	0	0	1	Resources-, processing, and product- related	Energy	Energy consumption (kWh or MJ)	1	ENV+SAF
2020	Zimmerman et al	Zimmerman et al2020	1	Scientific article	Academia	https://www.science.org/doi/10.1126/science.aay3060	Chemicals	not specified		1	0	0	0	1	Environmental	Resources	Limiting depletion of fossil/mineral resources (conceptual)	1	ENV+SAF+ECO
2020	Zimmerman et al	Zimmerman et al2020	1	Scientific article	Academia	https://www.science.org/doi/10.1126/science.aay3060	Chemicals	not specified		1	0	0	0	1	Resources-, processing, and product- related	Resources: types, quantity, and efficiency considerations	Renewable or fossil? (yes/no)	1	ENV+SAF+ECO
2020	Zimmerman et al	Zimmerman et al2020	1	Scientific article	Academia	https://www.science.org/doi/10.1126/science.aay3060	Chemicals	not specified		1	0	0	0	1	Resources-, processing, and product- related	Resources: types, quantity, and efficiency considerations	Amount of (solid/water) waste (kg or %)	1	ENV+SAF+ECO
2020	Zimmerman et al	Zimmerman et al2020	1	Scientific article	Academia	https://www.science.org/doi/10.1126/science.aay3060	Chemicals	not specified		1	0	0	0	1	Resources-, processing, and product- related	Resources: types, quantity, and efficiency considerations	Reaction efficiency (%)	1	ENV+SAF+ECO
2020	Zimmerman et al	Zimmerman et al2020	1	Scientific article	Academia	https://www.science.org/doi/10.1126/science.aay3060	Chemicals	not specified		1	0	0	0	1	Resources-, processing, and product- related	Circularity	Recyclability/circularity (conceptual)	1	ENV+SAF+ECO
2020	Zimmerman et al	Zimmerman et al2020	1	Scientific article	Academia	https://www.science.org/doi/10.1126/science.aay3060	Chemicals	not specified		1	0	0	0	1	Resources-, processing, and product- related	Energy	Cumulative energy demand (MJ)	1	ENV+SAF+ECO
2020	Zimmerman et al	Zimmerman et al2020	1	Scientific article	Academia	https://www.science.org/doi/10.1126/science.aay3060	Chemicals	not specified		1	0	0	0	1	Economic	Profitability	Profitability (conceptual)	1	ENV+SAF+ECO
2021	Abdel-Basset et al	Abdel-Basset et al2021	0	Scientific article	Academia	https://www.sciencedirect.com/science/article/pii/S0360319920341148	Chemicals	Fuels		0	0	1	1	0	Environmental	Resources	Land requirements	1	ENV+SAF+SOC+ECO
2021	Abdel-Basset et al	Abdel-Basset et al2021	0	Scientific article	Academia	https://www.sciencedirect.com/science/article/pii/S0360319920341148	Chemicals	Fuels		0	0	1	1	0	Environmental	Integrated Assessment	Influence/Impact on public health	1	ENV+SAF+SOC+ECO
2021	Abdel-Basset et al	Abdel-Basset et al2021	0	Scientific article	Academia	https://www.sciencedirect.com/science/article/pii/S0360319920341148	Chemicals	Fuels		0	0	1	1	0	Environmental	Water emission	Contaminants emission	1	ENV+SAF+SOC+ECO
2021	Abdel-Basset et al	Abdel-Basset et al2021	0	Scientific article	Academia	https://www.sciencedirect.com/science/article/pii/S0360319920341148	Chemicals	Fuels		0	0	1	1	0	Resources-, processing, and product- related	Resources: types, quantity, and efficiency considerations	Imported resources	1	ENV+SAF+SOC+ECO
2021	Abdel-Basset et al	Abdel-Basset et al2021	0	Scientific article	Academia	https://www.sciencedirect.com/science/article/pii/S0360319920341148	Chemicals	Fuels		0	0	1	1	0	Resources-, processing, and product- related	Resources: types, quantity, and efficiency considerations	Solid waste generation	1	ENV+SAF+SOC+ECO
2021	Abdel-Basset et al	Abdel-Basset et al2021	0	Scientific article	Academia	https://www.sciencedirect.com/science/article/pii/S0360319920341148	Chemicals	Fuels		0	0	1	1	0	Economic	Other	Predictability	1	ENV+SAF+SOC+ECO
2021	Abdel-Basset et al	Abdel-Basset et al2021	0	Scientific article	Academia	https://www.sciencedirect.com/science/article/pii/S0360319920341148	Chemicals	Fuels		0	0	1	1	0	Economic	Other	Scalability	1	ENV+SAF+SOC+ECO
2021	Abdel-Basset et al	Abdel-Basset et al2021	0	Scientific article	Academia	https://www.sciencedirect.com/science/article/pii/S0360319920341148	Chemicals	Fuels		0	0	1	1	0	Social	local community	Local employment	1	ENV+SAF+SOC+ECO
2021	Abdel-Basset et al	Abdel-Basset et al2021	0	Scientific article	Academia	https://www.sciencedirect.com/science/article/pii/S0360319920341148	Chemicals	Fuels		0	0	1	1	0	Social	workers	Labour influence	1	ENV+SAF+SOC+ECO
2021	Abdel-Basset et al	Abdel-Basset et al2021	0	Scientific article	Academia	https://www.sciencedirect.com/science/article/pii/S0360319920341148	Chemicals	Fuels		0	0	1	1	0	Economic	Other	Market acceptance	1	ENV+SAF+SOC+ECO
2021	Abdel-Basset et al	Abdel-Basset et al2021	0	Scientific article	Academia	https://www.sciencedirect.com/science/article/pii/S0360319920341148	Chemicals	Fuels		0	0	1	1	0	Economic	Internal cost	(Total) production cost (€)	1	ENV+SAF+SOC+ECO
2021	Abdel-Basset et al	Abdel-Basset et al2021	0	Scientific article	Academia	https://www.sciencedirect.com/science/article/pii/S0360319920341148	Chemicals	Fuels		0	0	1	1	0	Economic	Other	Initial and mantainance budget	1	ENV+SAF+SOC+ECO
2021	Agrawal	Agrawal2021	0	Scientific article	Academia	https://www.sciencedirect.com/science/article/pii/S0959652621007204	Materials	Additive manufacturing		1	0	1	0	0	Environmental	Climate Change	GWP 100 (kg CO₂eq)	1	ENV+SAF+ECO
2021	Agrawal	Agrawal2021	0	Scientific article	Academia	https://www.sciencedirect.com/science/article/pii/S0959652621007204	Materials	Additive manufacturing		1	0	1	0	0	Resources-, processing, and product- related	Energy	Energy consumption (kWh or MJ)	1	ENV+SAF+ECO
2021	Agrawal	Agrawal2021	0	Scientific article	Academia	https://www.sciencedirect.com/science/article/pii/S0959652621007204	Materials	Additive manufacturing		1	0	1	0	0	Economic	Profitability	Minimum selling price	1	ENV+SAF+ECO
2021	alGhatta et al	alGhatta et al2021	1	Scientific article	Academia	https://doi.org/10.1039/d0gc03991h	Chemicals	Solvents		0	0	0	0	1	Environmental	Air emission	Atmospheric CO2 emissions (g)	1	ENV+ECO
2021	alGhatta et al	alGhatta et al2021	1	Scientific article	Academia	https://doi.org/10.1039/d0gc03991h	Chemicals	Solvents		0	0	0	0	1	Economic	Profitability	Minimum selling price	1	ENV+ECO
2021	alGhatta et al	alGhatta et al2021	1	Scientific article	Academia	https://doi.org/10.1039/d0gc03991h	Chemicals	Solvents		0	0	0	0	1	Economic	Internal cost	(Total) production cost (€)	1	ENV+ECO
2021	alkhatib et al	alkhatib et al2021	0	Scientific article	Academia	https://www.sciencedirect.com/science/article/pii/S1383586621012247	Chemicals	Solvents		1	0	1	0	0	Environmental	Climate Change	GWP 100 (kg CO₂eq)	1	ENV+SOC
2021	alkhatib et al	alkhatib et al2021	0	Scientific article	Academia	https://www.sciencedirect.com/science/article/pii/S1383586621012247	Chemicals	Solvents		1	0	1	0	0	Environmental	Integrated Assessment	Eco-indicator 99 total [-]	1	ENV+SOC
2021	alkhatib et al	alkhatib et al2021	0	Scientific article	Academia	https://www.sciencedirect.com/science/article/pii/S1383586621012247	Chemicals	Solvents		1	0	1	0	0	Resources-, processing, and product- related	Energy	Cumulative energy demand (MJ)	1	ENV+SOC
2021	Arias et al	Arias et al2021	1	Scientific article	Academia	https://doi.org/10.1016/j.crgsc.2021.100160	Materials	Bioplastics		1	0	0	0	0	Environmental	Climate Change	GWP 100 (kg CO₂eq)	1	ENV+SAF+SOC+ECO
2021	Arias et al	Arias et al2021	1	Scientific article	Academia	https://doi.org/10.1016/j.crgsc.2021.100160	Materials	Bioplastics		1	0	0	0	0	Environmental	Toxicity	Ecotoxicity (CTU)	1	ENV+SAF+SOC+ECO
2021	Arias et al	Arias et al2021	1	Scientific article	Academia	https://doi.org/10.1016/j.crgsc.2021.100160	Materials	Bioplastics		1	0	0	0	0	Environmental	Stratospheric ozone Depletion	Ozone depletion potential (kg CFC-11)	1	ENV+SAF+SOC+ECO
2021	Arias et al	Arias et al2021	1	Scientific article	Academia	https://doi.org/10.1016/j.crgsc.2021.100160	Materials	Bioplastics		1	0	0	0	0	Environmental	Resources	Fossil resource scarcity (kg oil eq)	1	ENV+SAF+SOC+ECO
2021	Arias et al	Arias et al2021	1	Scientific article	Academia	https://doi.org/10.1016/j.crgsc.2021.100160	Materials	Bioplastics		1	0	0	0	0	Environmental	Integrated Assessment	Human Health (DALY)	1	ENV+SAF+SOC+ECO
2021	Arias et al	Arias et al2021	1	Scientific article	Academia	https://doi.org/10.1016/j.crgsc.2021.100160	Materials	Bioplastics		1	0	0	0	0	Resources-, processing, and product- related	Resources: types, quantity, and efficiency considerations	Non - Renewable resources amount	1	ENV+SAF+SOC+ECO
2021	Arias et al	Arias et al2021	1	Scientific article	Academia	https://doi.org/10.1016/j.crgsc.2021.100160	Materials	Bioplastics		1	0	0	0	0	Resources-, processing, and product- related	Resources: types, quantity, and efficiency considerations	Renewable resources amount	1	ENV+SAF+SOC+ECO
2021	Arias et al	Arias et al2021	1	Scientific article	Academia	https://doi.org/10.1016/j.crgsc.2021.100160	Materials	Bioplastics		1	0	0	0	0	Resources-, processing, and product- related	Resources: types, quantity, and efficiency considerations	Resources valorization	1	ENV+SAF+SOC+ECO
2021	Arias et al	Arias et al2021	1	Scientific article	Academia	https://doi.org/10.1016/j.crgsc.2021.100160	Materials	Bioplastics		1	0	0	0	0	Resources-, processing, and product- related	Circularity	Recyclability/circularity (conceptual)	1	ENV+SAF+SOC+ECO
2021	Arias et al	Arias et al2021	1	Scientific article	Academia	https://doi.org/10.1016/j.crgsc.2021.100160	Materials	Bioplastics		1	0	0	0	0	Resources-, processing, and product- related	Circularity	Waste utilization	1	ENV+SAF+SOC+ECO
2021	Arias et al	Arias et al2021	1	Scientific article	Academia	https://doi.org/10.1016/j.crgsc.2021.100160	Materials	Bioplastics		1	0	0	0	0	Resources-, processing, and product- related	Circularity	Reuse rate/reusability	1	ENV+SAF+SOC+ECO
2021	Arias et al	Arias et al2021	1	Scientific article	Academia	https://doi.org/10.1016/j.crgsc.2021.100160	Materials	Bioplastics		1	0	0	0	0	Resources-, processing, and product- related	Biodegradability	Biodegradablity (not specified)	1	ENV+SAF+SOC+ECO
2021	Arias et al	Arias et al2021	1	Scientific article	Academia	https://doi.org/10.1016/j.crgsc.2021.100160	Materials	Bioplastics		1	0	0	0	0	Social	consumer	Brand communication	1	ENV+SAF+SOC+ECO
2021	Arias et al	Arias et al2021	1	Scientific article	Academia	https://doi.org/10.1016/j.crgsc.2021.100160	Materials	Bioplastics		1	0	0	0	0	Social	consumer	Consumer acceptance	1	ENV+SAF+SOC+ECO
2021	Arias et al	Arias et al2021	1	Scientific article	Academia	https://doi.org/10.1016/j.crgsc.2021.100160	Materials	Bioplastics		1	0	0	0	0	Economic	Other	Waste management cost	1	ENV+SAF+SOC+ECO
2021	Arias et al	Arias et al2021	1	Scientific article	Academia	https://doi.org/10.1016/j.crgsc.2021.100160	Materials	Bioplastics		1	0	0	0	0	Economic	External cost	Life cycle cost	1	ENV+SAF+SOC+ECO
2021	Cradle to Cradle	Cradle to Cradle2021	0	Certification	Certification schemes	https://www.c2ccertified.org/	Materials and Products	not specified		1	0	0	0	1	Environmental	Climate Change	GWP 100 (kg CO₂eq)	1	ENV+SAF+SOC+ECO
2021	Cradle to Cradle	Cradle to Cradle2021	0	Certification	Certification schemes	https://www.c2ccertified.org/	Materials and Products	not specified		1	0	0	0	1	Resources-, processing, and product- related	Resources: types, quantity, and efficiency considerations	Renewable or fossil? (yes/no)	1	ENV+SAF+SOC+ECO
2021	Cradle to Cradle	Cradle to Cradle2021	0	Certification	Certification schemes	https://www.c2ccertified.org/	Materials and Products	not specified		1	0	0	0	1	Resources-, processing, and product- related	Resources: types, quantity, and efficiency considerations	Use of critical raw materials? (yes/no)	1	ENV+SAF+SOC+ECO
2021	Cradle to Cradle	Cradle to Cradle2021	0	Certification	Certification schemes	https://www.c2ccertified.org/	Materials and Products	not specified		1	0	0	0	1	Resources-, processing, and product- related	Resources: types, quantity, and efficiency considerations	Water consumption (m3)	1	ENV+SAF+SOC+ECO
2021	Cradle to Cradle	Cradle to Cradle2021	0	Certification	Certification schemes	https://www.c2ccertified.org/	Materials and Products	not specified		1	0	0	0	1	Resources-, processing, and product- related	Circularity	Recyclability/circularity (conceptual)	1	ENV+SAF+SOC+ECO
2021	Cradle to Cradle	Cradle to Cradle2021	0	Certification	Certification schemes	https://www.c2ccertified.org/	Materials and Products	not specified		1	0	0	0	1	Resources-, processing, and product- related	Circularity	Recycled content (%)	1	ENV+SAF+SOC+ECO
2021	Cradle to Cradle	Cradle to Cradle2021	0	Certification	Certification schemes	https://www.c2ccertified.org/	Materials and Products	not specified		1	0	0	0	1	Resources-, processing, and product- related	Circularity	Disassembly/reparability design (conceptual)	1	ENV+SAF+SOC+ECO
2021	Cradle to Cradle	Cradle to Cradle2021	0	Certification	Certification schemes	https://www.c2ccertified.org/	Materials and Products	not specified		1	0	0	0	1	Resources-, processing, and product- related	Energy	Energy efficiency (%)	1	ENV+SAF+SOC+ECO
2021	Cradle to Cradle	Cradle to Cradle2021	0	Certification	Certification schemes	https://www.c2ccertified.org/	Materials and Products	not specified		1	0	0	0	1	Social	society	Corruption prevention initiatives	1	ENV+SAF+SOC+ECO
2021	Cradle to Cradle	Cradle to Cradle2021	0	Certification	Certification schemes	https://www.c2ccertified.org/	Materials and Products	not specified		1	0	0	0	1	Social	workers	Equal opportunities and discrimination	1	ENV+SAF+SOC+ECO
2021	Cradle to Cradle	Cradle to Cradle2021	0	Certification	Certification schemes	https://www.c2ccertified.org/	Materials and Products	not specified		1	0	0	0	1	Social	local community	Human rights (conceptual)	1	ENV+SAF+SOC+ECO
2021	Cradle to Cradle	Cradle to Cradle2021	0	Certification	Certification schemes	https://www.c2ccertified.org/	Materials and Products	not specified		1	0	0	0	1	Social	workers	Child labour	1	ENV+SAF+SOC+ECO
2021	Cradle to Cradle	Cradle to Cradle2021	0	Certification	Certification schemes	https://www.c2ccertified.org/	Materials and Products	not specified		1	0	0	0	1	Social	workers	Forced labour	1	ENV+SAF+SOC+ECO
2021	Cradle to Cradle	Cradle to Cradle2021	0	Certification	Certification schemes	https://www.c2ccertified.org/	Materials and Products	not specified		1	0	0	0	1	Social	workers	Freedom of association and collective bargaining	1	ENV+SAF+SOC+ECO
2021	Cradle to Cradle	Cradle to Cradle2021	0	Certification	Certification schemes	https://www.c2ccertified.org/	Materials and Products	not specified		1	0	0	0	1	Social	workers	Working hours (e.g. maximum)/work-file balance	1	ENV+SAF+SOC+ECO
2021	Cradle to Cradle	Cradle to Cradle2021	0	Certification	Certification schemes	https://www.c2ccertified.org/	Materials and Products	not specified		1	0	0	0	1	Economic	Internal cost	Product cost	1	ENV+SAF+SOC+ECO
2021	Cradle to Cradle	Cradle to Cradle2021	0	Certification	Certification schemes	https://www.c2ccertified.org/	Materials and Products	not specified		1	0	0	0	1	Economic	Internal cost	Purchase cost	1	ENV+SAF+SOC+ECO
2021	CEFIC	CEFIC2021	0	Guidance	Industry	https://cefic.org/app/uploads/2021/09/Safe-and-Sustainable-by-Design-Report-Boosting-innovation-and-growth-within-the-European-chemical-industry.pdf	Chemicals	not specified		1	0	0	0	1	Environmental	Climate Change	GWP 100 (kg CO₂eq)	1	ENV+SAF+SOC+ECO
2021	CEFIC	CEFIC2021	0	Guidance	Industry	https://cefic.org/app/uploads/2021/09/Safe-and-Sustainable-by-Design-Report-Boosting-innovation-and-growth-within-the-European-chemical-industry.pdf	Chemicals	not specified		1	0	0	0	1	Environmental	Toxicity	Freshwater ecotoxicity (g C6H4CI2-eq)	1	ENV+SAF+SOC+ECO
2021	CEFIC	CEFIC2021	0	Guidance	Industry	https://cefic.org/app/uploads/2021/09/Safe-and-Sustainable-by-Design-Report-Boosting-innovation-and-growth-within-the-European-chemical-industry.pdf	Chemicals	not specified		1	0	0	0	1	Environmental	Toxicity	Terrestrial ecotoxicity (g C6H4CI2-eq)	1	ENV+SAF+SOC+ECO
2021	CEFIC	CEFIC2021	0	Guidance	Industry	https://cefic.org/app/uploads/2021/09/Safe-and-Sustainable-by-Design-Report-Boosting-innovation-and-growth-within-the-European-chemical-industry.pdf	Chemicals	not specified		1	0	0	0	1	Environmental	Toxicity	Human toxicity (not specified)	1	ENV+SAF+SOC+ECO
2021	CEFIC	CEFIC2021	0	Guidance	Industry	https://cefic.org/app/uploads/2021/09/Safe-and-Sustainable-by-Design-Report-Boosting-innovation-and-growth-within-the-European-chemical-industry.pdf	Chemicals	not specified		1	0	0	0	1	Environmental	Acidification	Acidification potential (molc H+ eq)	1	ENV+SAF+SOC+ECO
2021	CEFIC	CEFIC2021	0	Guidance	Industry	https://cefic.org/app/uploads/2021/09/Safe-and-Sustainable-by-Design-Report-Boosting-innovation-and-growth-within-the-European-chemical-industry.pdf	Chemicals	not specified		1	0	0	0	1	Environmental	Eutrophication	Eutrophication potential (kg of phosphate )	1	ENV+SAF+SOC+ECO
2021	CEFIC	CEFIC2021	0	Guidance	Industry	https://cefic.org/app/uploads/2021/09/Safe-and-Sustainable-by-Design-Report-Boosting-innovation-and-growth-within-the-European-chemical-industry.pdf	Chemicals	not specified		1	0	0	0	1	Environmental	Stratospheric ozone Depletion	Ozone depletion potential (kg CFC-11)	1	ENV+SAF+SOC+ECO
2021	CEFIC	CEFIC2021	0	Guidance	Industry	https://cefic.org/app/uploads/2021/09/Safe-and-Sustainable-by-Design-Report-Boosting-innovation-and-growth-within-the-European-chemical-industry.pdf	Chemicals	not specified		1	0	0	0	1	Environmental	Photochemical Ozone Formation	POCP (kg of ethene-eq or Kg NMVOC or kg O3)	1	ENV+SAF+SOC+ECO
2021	CEFIC	CEFIC2021	0	Guidance	Industry	https://cefic.org/app/uploads/2021/09/Safe-and-Sustainable-by-Design-Report-Boosting-innovation-and-growth-within-the-European-chemical-industry.pdf	Chemicals	not specified		1	0	0	0	1	Environmental	Resources	Water depletion potential (m3eq)	1	ENV+SAF+SOC+ECO
2021	CEFIC	CEFIC2021	0	Guidance	Industry	https://cefic.org/app/uploads/2021/09/Safe-and-Sustainable-by-Design-Report-Boosting-innovation-and-growth-within-the-European-chemical-industry.pdf	Chemicals	not specified		1	0	0	0	1	Environmental	Resources	Land occupation (m2a crop eq)	1	ENV+SAF+SOC+ECO
2021	CEFIC	CEFIC2021	0	Guidance	Industry	https://cefic.org/app/uploads/2021/09/Safe-and-Sustainable-by-Design-Report-Boosting-innovation-and-growth-within-the-European-chemical-industry.pdf	Chemicals	not specified		1	0	0	0	1	Environmental	Resources	Resource depletion potential (kg Sb eq)	1	ENV+SAF+SOC+ECO
2021	CEFIC	CEFIC2021	0	Guidance	Industry	https://cefic.org/app/uploads/2021/09/Safe-and-Sustainable-by-Design-Report-Boosting-innovation-and-growth-within-the-European-chemical-industry.pdf	Chemicals	not specified		1	0	0	0	1	Environmental	Resources	Resource use/depletion - fossil (MJ)	1	ENV+SAF+SOC+ECO
2021	CEFIC	CEFIC2021	0	Guidance	Industry	https://cefic.org/app/uploads/2021/09/Safe-and-Sustainable-by-Design-Report-Boosting-innovation-and-growth-within-the-European-chemical-industry.pdf	Chemicals	not specified		1	0	0	0	1	Resources-, processing, and product- related	Resources: types, quantity, and efficiency considerations	Renewable or fossil? (yes/no)	1	ENV+SAF+SOC+ECO
2021	CEFIC	CEFIC2021	0	Guidance	Industry	https://cefic.org/app/uploads/2021/09/Safe-and-Sustainable-by-Design-Report-Boosting-innovation-and-growth-within-the-European-chemical-industry.pdf	Chemicals	not specified		1	0	0	0	1	Resources-, processing, and product- related	Circularity	Recyclability/circularity (conceptual)	1	ENV+SAF+SOC+ECO
2021	CEFIC	CEFIC2021	0	Guidance	Industry	https://cefic.org/app/uploads/2021/09/Safe-and-Sustainable-by-Design-Report-Boosting-innovation-and-growth-within-the-European-chemical-industry.pdf	Chemicals	not specified		1	0	0	0	1	Resources-, processing, and product- related	Circularity	Disassembly/reparability design (conceptual)	1	ENV+SAF+SOC+ECO
2021	CEFIC	CEFIC2021	0	Guidance	Industry	https://cefic.org/app/uploads/2021/09/Safe-and-Sustainable-by-Design-Report-Boosting-innovation-and-growth-within-the-European-chemical-industry.pdf	Chemicals	not specified		1	0	0	0	1	Resources-, processing, and product- related	Circularity	Durability (years)	1	ENV+SAF+SOC+ECO
2021	CEFIC	CEFIC2021	0	Guidance	Industry	https://cefic.org/app/uploads/2021/09/Safe-and-Sustainable-by-Design-Report-Boosting-innovation-and-growth-within-the-European-chemical-industry.pdf	Chemicals	not specified		1	0	0	0	1	Resources-, processing, and product- related	Biodegradability	Biodegradability (conceptual)	1	ENV+SAF+SOC+ECO
2021	CEFIC	CEFIC2021	0	Guidance	Industry	https://cefic.org/app/uploads/2021/09/Safe-and-Sustainable-by-Design-Report-Boosting-innovation-and-growth-within-the-European-chemical-industry.pdf	Chemicals	not specified		1	0	0	0	1	Social	local community	Local employment	1	ENV+SAF+SOC+ECO
2021	CEFIC	CEFIC2021	0	Guidance	Industry	https://cefic.org/app/uploads/2021/09/Safe-and-Sustainable-by-Design-Report-Boosting-innovation-and-growth-within-the-European-chemical-industry.pdf	Chemicals	not specified		1	0	0	0	1	Social	consumer	Ethics in marketing communication	1	ENV+SAF+SOC+ECO
2021	CEFIC	CEFIC2021	0	Guidance	Industry	https://cefic.org/app/uploads/2021/09/Safe-and-Sustainable-by-Design-Report-Boosting-innovation-and-growth-within-the-European-chemical-industry.pdf	Chemicals	not specified		1	0	0	0	1	Social	workers	Workers health & safety	1	ENV+SAF+SOC+ECO
2021	CEFIC	CEFIC2021	0	Guidance	Industry	https://cefic.org/app/uploads/2021/09/Safe-and-Sustainable-by-Design-Report-Boosting-innovation-and-growth-within-the-European-chemical-industry.pdf	Chemicals	not specified		1	0	0	0	1	Social	local community	Human rights (conceptual)	1	ENV+SAF+SOC+ECO
2021	CEFIC	CEFIC2021	0	Guidance	Industry	https://cefic.org/app/uploads/2021/09/Safe-and-Sustainable-by-Design-Report-Boosting-innovation-and-growth-within-the-European-chemical-industry.pdf	Chemicals	not specified		1	0	0	0	1	Social	workers	Forced labour	1	ENV+SAF+SOC+ECO
2021	CEFIC	CEFIC2021	0	Guidance	Industry	https://cefic.org/app/uploads/2021/09/Safe-and-Sustainable-by-Design-Report-Boosting-innovation-and-growth-within-the-European-chemical-industry.pdf	Chemicals	not specified		1	0	0	0	1	Social	workers	Part time work	1	ENV+SAF+SOC+ECO
2021	CEFIC	CEFIC2021	0	Guidance	Industry	https://cefic.org/app/uploads/2021/09/Safe-and-Sustainable-by-Design-Report-Boosting-innovation-and-growth-within-the-European-chemical-industry.pdf	Chemicals	not specified		1	0	0	0	1	Social	workers	Fair salary	1	ENV+SAF+SOC+ECO
2021	CEFIC	CEFIC2021	0	Guidance	Industry	https://cefic.org/app/uploads/2021/09/Safe-and-Sustainable-by-Design-Report-Boosting-innovation-and-growth-within-the-European-chemical-industry.pdf	Chemicals	not specified		1	0	0	0	1	Social	workers	Working hours (e.g. maximum)/work-file balance	1	ENV+SAF+SOC+ECO
2021	CEFIC	CEFIC2021	0	Guidance	Industry	https://cefic.org/app/uploads/2021/09/Safe-and-Sustainable-by-Design-Report-Boosting-innovation-and-growth-within-the-European-chemical-industry.pdf	Chemicals	not specified		1	0	0	0	1	Economic	value chain actors	Stakeholders requirements	1	ENV+SAF+SOC+ECO
2021	CEFIC	CEFIC2021	0	Guidance	Industry	https://cefic.org/app/uploads/2021/09/Safe-and-Sustainable-by-Design-Report-Boosting-innovation-and-growth-within-the-European-chemical-industry.pdf	Chemicals	not specified		1	0	0	0	1	Economic	value chain actors	Value chain collaboration	1	ENV+SAF+SOC+ECO
2021	CEFIC	CEFIC2021	0	Guidance	Industry	https://cefic.org/app/uploads/2021/09/Safe-and-Sustainable-by-Design-Report-Boosting-innovation-and-growth-within-the-European-chemical-industry.pdf	Chemicals	not specified		1	0	0	0	1	Economic	value chain actors	Transparency and information	1	ENV+SAF+SOC+ECO
2021	CEFIC	CEFIC2021	0	Guidance	Industry	https://cefic.org/app/uploads/2021/09/Safe-and-Sustainable-by-Design-Report-Boosting-innovation-and-growth-within-the-European-chemical-industry.pdf	Chemicals	not specified		1	0	0	0	1	Economic	value chain actors	Product performance	1	ENV+SAF+SOC+ECO
2021	CHEMSEC	CHEMSEC2021	0	Guidance	NGOs	https://chemsec.org/publication/chemical-strategy/our-view-on-safe-and-sustainable-by-design-criteria/	Chemicals	not specified		1	0	0	0	1	Environmental	Integrated Assessment	Biodiversity protection (conceptual)	1	ENV+SAF+SOC
2021	CHEMSEC	CHEMSEC2021	0	Guidance	NGOs	https://chemsec.org/publication/chemical-strategy/our-view-on-safe-and-sustainable-by-design-criteria/	Chemicals	not specified		1	0	0	0	1	Environmental	Integrated Assessment	Ecosystems damage (conceptual)	1	ENV+SAF+SOC
2021	CHEMSEC	CHEMSEC2021	0	Guidance	NGOs	https://chemsec.org/publication/chemical-strategy/our-view-on-safe-and-sustainable-by-design-criteria/	Chemicals	not specified		1	0	0	0	1	Environmental	Air emission	Atmospheric CO2 emissions (g)	1	ENV+SAF+SOC
2021	CHEMSEC	CHEMSEC2021	0	Guidance	NGOs	https://chemsec.org/publication/chemical-strategy/our-view-on-safe-and-sustainable-by-design-criteria/	Chemicals	not specified		1	0	0	0	1	Resources-, processing, and product- related	Resources: types, quantity, and efficiency considerations	Water consumption (m3)	1	ENV+SAF+SOC
2021	CHEMSEC	CHEMSEC2021	0	Guidance	NGOs	https://chemsec.org/publication/chemical-strategy/our-view-on-safe-and-sustainable-by-design-criteria/	Chemicals	not specified		1	0	0	0	1	Resources-, processing, and product- related	Resources: types, quantity, and efficiency considerations	Amount of (solid/water) waste (kg or %)	1	ENV+SAF+SOC
2021	CHEMSEC	CHEMSEC2021	0	Guidance	NGOs	https://chemsec.org/publication/chemical-strategy/our-view-on-safe-and-sustainable-by-design-criteria/	Chemicals	not specified		1	0	0	0	1	Social	local community	Access to basic needs	1	ENV+SAF+SOC
2021	CLiCC	CLiCC2021	0	Tool	Government agencies	https://clicc.ucsb.edu/research-overview	Chemicals	not specified		1	0	0	1	1	Environmental	Climate Change	GWP 100 (kg CO₂eq)	1	ENV+SAF
2021	CLiCC	CLiCC2021	0	Tool	Government agencies	https://clicc.ucsb.edu/research-overview	Chemicals	not specified		1	0	0	1	1	Environmental	Acidification	Acidification potential (molc H+ eq)	1	ENV+SAF
2021	CLiCC	CLiCC2021	0	Tool	Government agencies	https://clicc.ucsb.edu/research-overview	Chemicals	not specified		1	0	0	1	1	Environmental	Integrated Assessment	Eco-indicator99 ecosystems quality [-]	1	ENV+SAF
2021	CLiCC	CLiCC2021	0	Tool	Government agencies	https://clicc.ucsb.edu/research-overview	Chemicals	not specified		1	0	0	1	1	Environmental	Integrated Assessment	Eco-indicator 99 total [-]	1	ENV+SAF
2021	CLiCC	CLiCC2021	0	Tool	Government agencies	https://clicc.ucsb.edu/research-overview	Chemicals	not specified		1	0	0	1	1	Environmental	Integrated Assessment	Eco-Indicator99 Human health (DALY)	1	ENV+SAF
2021	CLiCC	CLiCC2021	0	Tool	Government agencies	https://clicc.ucsb.edu/research-overview	Chemicals	not specified		1	0	0	1	1	Resources-, processing, and product- related	Energy	Cumulative energy demand (MJ)	1	ENV+SAF
2021	Crivellari et al	Crivellari et al2021	0	Scientific article	Academia	https://www.sciencedirect.com/science/article/pii/S0959652621004467	Chemicals	energy carrier		0	0	1	1	0	Environmental	Climate Change	GWP 100 (kg CO₂eq)	1	ENV
2021	Crivellari et al	Crivellari et al2021	0	Scientific article	Academia	https://www.sciencedirect.com/science/article/pii/S0959652621004467	Chemicals	energy carrier		0	0	1	1	0	Environmental	Integrated Assessment	Inherent safety indicator	1	ENV
2021	Figueiredo et al	Figueiredo et al2021	0	Scientific article	Academia	https://www.sciencedirect.com/science/article/pii/S0360132321002122	Materials	Building materials	Construction	0	1	1	1	0	Environmental	Climate Change	GWP 100 (kg CO₂eq)	1	ENV+SOC+ECO
2021	Figueiredo et al	Figueiredo et al2021	0	Scientific article	Academia	https://www.sciencedirect.com/science/article/pii/S0360132321002122	Materials	Building materials	Construction	0	1	1	1	0	Environmental	Acidification	Acidification potential (molc H+ eq)	1	ENV+SOC+ECO
2021	Figueiredo et al	Figueiredo et al2021	0	Scientific article	Academia	https://www.sciencedirect.com/science/article/pii/S0360132321002122	Materials	Building materials	Construction	0	1	1	1	0	Social	workers	Fair salary	1	ENV+SOC+ECO
2021	Figueiredo et al	Figueiredo et al2021	0	Scientific article	Academia	https://www.sciencedirect.com/science/article/pii/S0360132321002122	Materials	Building materials	Construction	0	1	1	1	0	Economic	External cost	Life cycle cost	1	ENV+SOC+ECO
2021	Fleitmann et al	Fleitmann et al2021	1	Scientific article	Academia	https://doi.org/10.1016/j.ces.2021.116863	Chemicals	Solvents		1	0	0	0	1	Environmental	Climate Change	GWP 100 (kg CO₂eq)	1	ENV+ECO
2021	Fleitmann et al	Fleitmann et al2021	1	Scientific article	Academia	https://doi.org/10.1016/j.ces.2021.116863	Chemicals	Solvents		1	0	0	0	1	Environmental	Toxicity	Marine ecotoxicity (g C6H4CI2-eq)	1	ENV+ECO
2021	Fleitmann et al	Fleitmann et al2021	1	Scientific article	Academia	https://doi.org/10.1016/j.ces.2021.116863	Chemicals	Solvents		1	0	0	0	1	Environmental	Toxicity	Freshwater ecotoxicity (g C6H4CI2-eq)	1	ENV+ECO
2021	Fleitmann et al	Fleitmann et al2021	1	Scientific article	Academia	https://doi.org/10.1016/j.ces.2021.116863	Chemicals	Solvents		1	0	0	0	1	Environmental	Toxicity	Terrestrial ecotoxicity (g C6H4CI2-eq)	1	ENV+ECO
2021	Fleitmann et al	Fleitmann et al2021	1	Scientific article	Academia	https://doi.org/10.1016/j.ces.2021.116863	Chemicals	Solvents		1	0	0	0	1	Environmental	Toxicity	Human toxicity potential (kg 1,4 DCB eq or CTUh)	1	ENV+ECO
2021	Fleitmann et al	Fleitmann et al2021	1	Scientific article	Academia	https://doi.org/10.1016/j.ces.2021.116863	Chemicals	Solvents		1	0	0	0	1	Environmental	Ionizing radiation	Ionizing radiation (kBq U235 eq)	1	ENV+ECO
2021	Fleitmann et al	Fleitmann et al2021	1	Scientific article	Academia	https://doi.org/10.1016/j.ces.2021.116863	Chemicals	Solvents		1	0	0	0	1	Environmental	Acidification	Terrestrial acidification (kg SO2eq)	1	ENV+ECO
2021	Fleitmann et al	Fleitmann et al2021	1	Scientific article	Academia	https://doi.org/10.1016/j.ces.2021.116863	Chemicals	Solvents		1	0	0	0	1	Environmental	Eutrophication	Marine eutrophication potential (mol N eq)	1	ENV+ECO
2021	Fleitmann et al	Fleitmann et al2021	1	Scientific article	Academia	https://doi.org/10.1016/j.ces.2021.116863	Chemicals	Solvents		1	0	0	0	1	Environmental	Eutrophication	Freshwater eutrophication potential (kg P eq)	1	ENV+ECO
2021	Fleitmann et al	Fleitmann et al2021	1	Scientific article	Academia	https://doi.org/10.1016/j.ces.2021.116863	Chemicals	Solvents		1	0	0	0	1	Environmental	Stratospheric ozone Depletion	Ozone depletion potential (kg CFC-11)	1	ENV+ECO
2021	Fleitmann et al	Fleitmann et al2021	1	Scientific article	Academia	https://doi.org/10.1016/j.ces.2021.116863	Chemicals	Solvents		1	0	0	0	1	Environmental	Particulate Matter	Particulate matter (PM 2.5eq)	1	ENV+ECO
2021	Fleitmann et al	Fleitmann et al2021	1	Scientific article	Academia	https://doi.org/10.1016/j.ces.2021.116863	Chemicals	Solvents		1	0	0	0	1	Environmental	Photochemical Ozone Formation	POCP (kg of ethene-eq or Kg NMVOC or kg O3)	1	ENV+ECO
2021	Fleitmann et al	Fleitmann et al2021	1	Scientific article	Academia	https://doi.org/10.1016/j.ces.2021.116863	Chemicals	Solvents		1	0	0	0	1	Environmental	Resources	Water depletion potential (m3eq)	1	ENV+ECO
2021	Fleitmann et al	Fleitmann et al2021	1	Scientific article	Academia	https://doi.org/10.1016/j.ces.2021.116863	Chemicals	Solvents		1	0	0	0	1	Environmental	Resources	Land occupation (m2a crop eq)	1	ENV+ECO
2021	Fleitmann et al	Fleitmann et al2021	1	Scientific article	Academia	https://doi.org/10.1016/j.ces.2021.116863	Chemicals	Solvents		1	0	0	0	1	Environmental	Resources	Resource depletion potential (kg Sb eq)	1	ENV+ECO
2021	Fleitmann et al	Fleitmann et al2021	1	Scientific article	Academia	https://doi.org/10.1016/j.ces.2021.116863	Chemicals	Solvents		1	0	0	0	1	Environmental	Resources	Resource use/depletion - fossil (MJ)	1	ENV+ECO
2021	Fleitmann et al	Fleitmann et al2021	1	Scientific article	Academia	https://doi.org/10.1016/j.ces.2021.116863	Chemicals	Solvents		1	0	0	0	1	Economic	Internal cost	Product cost	1	ENV+ECO
2021	Groetsch et al	Groetsch et al2021	0	Scientific article	Academia	https://doi.org/10.1016/j.procir.2021.01.146	Materials	carbon fiber	not specified	1	0	0	0	0	Environmental	Climate Change	GWP 100 (kg CO₂eq)	1	ENV+SAF+ECO
2021	Groetsch et al	Groetsch et al2021	0	Scientific article	Academia	https://doi.org/10.1016/j.procir.2021.01.146	Materials	carbon fiber	not specified	1	0	0	0	0	Environmental	Acidification	Terrestrial acidification (kg SO2eq)	1	ENV+SAF+ECO
2021	Groetsch et al	Groetsch et al2021	0	Scientific article	Academia	https://doi.org/10.1016/j.procir.2021.01.146	Materials	carbon fiber	not specified	1	0	0	0	0	Environmental	Eutrophication	Eutrophication potential (kg of phosphate )	1	ENV+SAF+ECO
2021	Groetsch et al	Groetsch et al2021	0	Scientific article	Academia	https://doi.org/10.1016/j.procir.2021.01.146	Materials	carbon fiber	not specified	1	0	0	0	0	Resources-, processing, and product- related	Energy	Energy consumption (kWh or MJ)	1	ENV+SAF+ECO
2021	Groetsch et al	Groetsch et al2021	0	Scientific article	Academia	https://doi.org/10.1016/j.procir.2021.01.146	Materials	carbon fiber	not specified	1	0	0	0	0	Economic	External cost	Life cycle cost	1	ENV+SAF+ECO
2021	Hatefi et al	Hatefi et al2021	0	Scientific article	Academia	https://www.mdpi.com/2071-1050/13/18/10438	Materials	Building materials	Construction	0	0	1	0	0	Environmental	Climate Change	GWP 100 (kg CO₂eq)	1	ENV+SAF+SOC+ECO
2021	Hatefi et al	Hatefi et al2021	0	Scientific article	Academia	https://www.mdpi.com/2071-1050/13/18/10438	Materials	Building materials	Construction	0	0	1	0	0	Resources-, processing, and product- related	Resources: types, quantity, and efficiency considerations	Non - Renewable resources amount	1	ENV+SAF+SOC+ECO
2021	Hatefi et al	Hatefi et al2021	0	Scientific article	Academia	https://www.mdpi.com/2071-1050/13/18/10438	Materials	Building materials	Construction	0	0	1	0	0	Resources-, processing, and product- related	Resources: types, quantity, and efficiency considerations	Renewable resources amount	1	ENV+SAF+SOC+ECO
2021	Hatefi et al	Hatefi et al2021	0	Scientific article	Academia	https://www.mdpi.com/2071-1050/13/18/10438	Materials	Building materials	Construction	0	0	1	0	0	Economic	Other	Waste management cost	1	ENV+SAF+SOC+ECO
2021	Hatefi et al	Hatefi et al2021	0	Scientific article	Academia	https://www.mdpi.com/2071-1050/13/18/10438	Materials	Building materials	Construction	0	0	1	0	0	Resources-, processing, and product- related	Circularity	Durability of the building	1	ENV+SAF+SOC+ECO
2021	Hatefi et al	Hatefi et al2021	0	Scientific article	Academia	https://www.mdpi.com/2071-1050/13/18/10438	Materials	Building materials	Construction	0	0	1	0	0	Social	value chain actors	Regional materials	1	ENV+SAF+SOC+ECO
2021	Hatefi et al	Hatefi et al2021	0	Scientific article	Academia	https://www.mdpi.com/2071-1050/13/18/10438	Materials	Building materials	Construction	0	0	1	0	0	Social	workers	Workers health & safety	1	ENV+SAF+SOC+ECO
2021	Hatefi et al	Hatefi et al2021	0	Scientific article	Academia	https://www.mdpi.com/2071-1050/13/18/10438	Materials	Building materials	Construction	0	0	1	0	0	Social	local community	Impact in local economy	1	ENV+SAF+SOC+ECO
2021	Hatefi et al	Hatefi et al2021	0	Scientific article	Academia	https://www.mdpi.com/2071-1050/13/18/10438	Materials	Building materials	Construction	0	0	1	0	0	Economic	Other	Comfort of occupants	1	ENV+SAF+SOC+ECO
2021	Hatefi et al	Hatefi et al2021	0	Scientific article	Academia	https://www.mdpi.com/2071-1050/13/18/10438	Materials	Building materials	Construction	0	0	1	0	0	Economic	Other	Market acceptance	1	ENV+SAF+SOC+ECO
2021	Hatefi et al	Hatefi et al2021	0	Scientific article	Academia	https://www.mdpi.com/2071-1050/13/18/10438	Materials	Building materials	Construction	0	0	1	0	0	Economic	Internal cost	(Total) production cost (€)	1	ENV+SAF+SOC+ECO
2021	Hatefi et al	Hatefi et al2021	0	Scientific article	Academia	https://www.mdpi.com/2071-1050/13/18/10438	Materials	Building materials	Construction	0	0	1	0	0	Economic	Internal cost	Cost of maintenance/repairs	1	ENV+SAF+SOC+ECO
2021	IFRA-IOFI	IFRA-IOFI2021	0	Certification	Certification schemes	https://ifra-iofi.org/	Chemicals	Fragrance	Cleaning and hygiene	1	0	0	0	1	Environmental	Climate Change	GWP 100 (kg CO₂eq)	1	ENV+SAF+SOC
2021	IFRA-IOFI	IFRA-IOFI2021	0	Certification	Certification schemes	https://ifra-iofi.org/	Chemicals	Fragrance	Cleaning and hygiene	1	0	0	0	1	Resources-, processing, and product- related	Resources: types, quantity, and efficiency considerations	Water consumption (m3)	1	ENV+SAF+SOC
2021	IFRA-IOFI	IFRA-IOFI2021	0	Certification	Certification schemes	https://ifra-iofi.org/	Chemicals	Fragrance	Cleaning and hygiene	1	0	0	0	1	Resources-, processing, and product- related	Resources: types, quantity, and efficiency considerations	Amount of (solid/water) waste (kg or %)	1	ENV+SAF+SOC
2021	IFRA-IOFI	IFRA-IOFI2021	0	Certification	Certification schemes	https://ifra-iofi.org/	Chemicals	Fragrance	Cleaning and hygiene	1	0	0	0	1	Resources-, processing, and product- related	Energy	Energy consumption (kWh or MJ)	1	ENV+SAF+SOC
2021	IFRA-IOFI	IFRA-IOFI2021	0	Certification	Certification schemes	https://ifra-iofi.org/	Chemicals	Fragrance	Cleaning and hygiene	1	0	0	0	1	Social	workers	Respect for the national standards for security and social responsibility	1	ENV+SAF+SOC
2021	IFRA-IOFI	IFRA-IOFI2021	0	Certification	Certification schemes	https://ifra-iofi.org/	Chemicals	Fragrance	Cleaning and hygiene	1	0	0	0	1	Social	workers	Annual job trainings	1	ENV+SAF+SOC
2021	NATRUE	NATRUE 2021	0	Certification	Certification schemes	https://www.natrue.org/our-standard/natrue-criteria-2/	Chemicals and products	not specified	Cosmetics	0	0	0	0	1	Environmental	Integrated Assessment	Biodiversity protection (conceptual)	1	ENV+SAF+SOC
2021	NATRUE	NATRUE 2021	0	Certification	Certification schemes	https://www.natrue.org/our-standard/natrue-criteria-2/	Chemicals and products	not specified	Cosmetics	0	0	0	0	1	Resources-, processing, and product- related	Biodegradability	Biodegradability requirement (EU law specification)	1	ENV+SAF+SOC
2021	NATRUE	NATRUE 2021	0	Certification	Certification schemes	https://www.natrue.org/our-standard/natrue-criteria-2/	Chemicals and products	not specified	Cosmetics	0	0	0	0	1	Social	consumer	Content of natural substances (%)	1	ENV+SAF+SOC
2021	Platform on Sustainable Finance	Platform on Sustainable Finance2021	0	Guidance	Government agencies	https://ec.europa.eu/info/business-economy-euro/banking-and-finance/sustainable-finance/overview-sustainable-finance/platform-sustainable-finance_en	Chemicals	not specified		1	0	0	0	1	Environmental	Climate Change	GWP 100 (kg CO₂eq)	1	ENV+SAF+ECO
2021	Platform on Sustainable Finance	Platform on Sustainable Finance2021	0	Guidance	Government agencies	https://ec.europa.eu/info/business-economy-euro/banking-and-finance/sustainable-finance/overview-sustainable-finance/platform-sustainable-finance_en	Chemicals	not specified		1	0	0	0	1	Environmental	Acidification	Acidification potential (molc H+ eq)	1	ENV+SAF+ECO
2021	Platform on Sustainable Finance	Platform on Sustainable Finance2021	0	Guidance	Government agencies	https://ec.europa.eu/info/business-economy-euro/banking-and-finance/sustainable-finance/overview-sustainable-finance/platform-sustainable-finance_en	Chemicals	not specified		1	0	0	0	1	Environmental	Eutrophication	Eutrophication potential (kg of phosphate )	1	ENV+SAF+ECO
2021	Platform on Sustainable Finance	Platform on Sustainable Finance2021	0	Guidance	Government agencies	https://ec.europa.eu/info/business-economy-euro/banking-and-finance/sustainable-finance/overview-sustainable-finance/platform-sustainable-finance_en	Chemicals	not specified		1	0	0	0	1	Environmental	Particulate Matter	Particulate matter (PM 2.5eq)	1	ENV+SAF+ECO
2021	Platform on Sustainable Finance	Platform on Sustainable Finance2021	0	Guidance	Government agencies	https://ec.europa.eu/info/business-economy-euro/banking-and-finance/sustainable-finance/overview-sustainable-finance/platform-sustainable-finance_en	Chemicals	not specified		1	0	0	0	1	Environmental	Photochemical Ozone Formation	POCP (kg of ethene-eq or Kg NMVOC or kg O3)	1	ENV+SAF+ECO
2021	Platform on Sustainable Finance	Platform on Sustainable Finance2021	0	Guidance	Government agencies	https://ec.europa.eu/info/business-economy-euro/banking-and-finance/sustainable-finance/overview-sustainable-finance/platform-sustainable-finance_en	Chemicals	not specified		1	0	0	0	1	Environmental	Resources	Resource depletion potential (kg Sb eq)	1	ENV+SAF+ECO
2021	Platform on Sustainable Finance	Platform on Sustainable Finance2021	0	Guidance	Government agencies	https://ec.europa.eu/info/business-economy-euro/banking-and-finance/sustainable-finance/overview-sustainable-finance/platform-sustainable-finance_en	Chemicals	not specified		1	0	0	0	1	Environmental	Resources	Limiting depletion of fossil/mineral resources (conceptual)	1	ENV+SAF+ECO
2021	Platform on Sustainable Finance	Platform on Sustainable Finance2021	0	Guidance	Government agencies	https://ec.europa.eu/info/business-economy-euro/banking-and-finance/sustainable-finance/overview-sustainable-finance/platform-sustainable-finance_en	Chemicals	not specified		1	0	0	0	1	Environmental	Integrated Assessment	Biodiversity protection (conceptual)	1	ENV+SAF+ECO
2021	Platform on Sustainable Finance	Platform on Sustainable Finance2021	0	Guidance	Government agencies	https://ec.europa.eu/info/business-economy-euro/banking-and-finance/sustainable-finance/overview-sustainable-finance/platform-sustainable-finance_en	Chemicals	not specified		1	0	0	0	1	Environmental	Air emission	Fine particulate matter (mg PM 2.5)	1	ENV+SAF+ECO
2021	Platform on Sustainable Finance	Platform on Sustainable Finance2021	0	Guidance	Government agencies	https://ec.europa.eu/info/business-economy-euro/banking-and-finance/sustainable-finance/overview-sustainable-finance/platform-sustainable-finance_en	Chemicals	not specified		1	0	0	0	1	Resources-, processing, and product- related	Resources: types, quantity, and efficiency considerations	Renewable or fossil? (yes/no)	1	ENV+SAF+ECO
2021	Platform on Sustainable Finance	Platform on Sustainable Finance2021	0	Guidance	Government agencies	https://ec.europa.eu/info/business-economy-euro/banking-and-finance/sustainable-finance/overview-sustainable-finance/platform-sustainable-finance_en	Chemicals	not specified		1	0	0	0	1	Resources-, processing, and product- related	Resources: types, quantity, and efficiency considerations	Amount of (solid/water) waste (kg or %)	1	ENV+SAF+ECO
2021	Platform on Sustainable Finance	Platform on Sustainable Finance2021	0	Guidance	Government agencies	https://ec.europa.eu/info/business-economy-euro/banking-and-finance/sustainable-finance/overview-sustainable-finance/platform-sustainable-finance_en	Chemicals	not specified		1	0	0	0	1	Resources-, processing, and product- related	Circularity	Recyclability/circularity (conceptual)	1	ENV+SAF+ECO
2021	Platform on Sustainable Finance	Platform on Sustainable Finance2021	0	Guidance	Government agencies	https://ec.europa.eu/info/business-economy-euro/banking-and-finance/sustainable-finance/overview-sustainable-finance/platform-sustainable-finance_en	Chemicals	not specified		1	0	0	0	1	Resources-, processing, and product- related	Circularity	Disassembly/reparability design (conceptual)	1	ENV+SAF+ECO
2021	Platform on Sustainable Finance	Platform on Sustainable Finance2021	0	Guidance	Government agencies	https://ec.europa.eu/info/business-economy-euro/banking-and-finance/sustainable-finance/overview-sustainable-finance/platform-sustainable-finance_en	Chemicals	not specified		1	0	0	0	1	Resources-, processing, and product- related	Circularity	Durability (years)	1	ENV+SAF+ECO
2021	Platform on Sustainable Finance	Platform on Sustainable Finance2021	0	Guidance	Government agencies	https://ec.europa.eu/info/business-economy-euro/banking-and-finance/sustainable-finance/overview-sustainable-finance/platform-sustainable-finance_en	Chemicals	not specified		1	0	0	0	1	Resources-, processing, and product- related	Energy	Energy consumption (kWh or MJ)	1	ENV+SAF+ECO
2021	Platform on Sustainable Finance	Platform on Sustainable Finance2021	0	Guidance	Government agencies	https://ec.europa.eu/info/business-economy-euro/banking-and-finance/sustainable-finance/overview-sustainable-finance/platform-sustainable-finance_en	Chemicals	not specified		1	0	0	0	1	Economic	Internal cost	Product cost	1	ENV+SAF+ECO
2021	Platform on Sustainable Finance	Platform on Sustainable Finance2021	0	Guidance	Government agencies	https://ec.europa.eu/info/business-economy-euro/banking-and-finance/sustainable-finance/overview-sustainable-finance/platform-sustainable-finance_en	Chemicals	not specified		1	0	0	0	1	Economic	Internal cost	Purchase cost	1	ENV+SAF+ECO
2021	Tian et al	Tian et al2021	0	Scientific article	Academia	https://doi.org/10.1016/j.scitotenv.2021.145049	Materials	Plastics	not specified	1	0	0	0	0	Environmental	Climate Change	GWP 100 (kg CO₂eq)	1	ENV+SAF+ECO
2021	Tian et al	Tian et al2021	0	Scientific article	Academia	https://doi.org/10.1016/j.scitotenv.2021.145049	Materials	Plastics	not specified	1	0	0	0	0	Environmental	Climate Change	Climate change damage (DALY)	1	ENV+SAF+ECO
2021	Tian et al	Tian et al2021	0	Scientific article	Academia	https://doi.org/10.1016/j.scitotenv.2021.145049	Materials	Plastics	not specified	1	0	0	0	0	Environmental	Toxicity	Freshwater ecotoxicity (g C6H4CI2-eq)	1	ENV+SAF+ECO
2021	Tian et al	Tian et al2021	0	Scientific article	Academia	https://doi.org/10.1016/j.scitotenv.2021.145049	Materials	Plastics	not specified	1	0	0	0	0	Environmental	Toxicity	Terrestrial ecotoxicity (g C6H4CI2-eq)	1	ENV+SAF+ECO
2021	Tian et al	Tian et al2021	0	Scientific article	Academia	https://doi.org/10.1016/j.scitotenv.2021.145049	Materials	Plastics	not specified	1	0	0	0	0	Environmental	Ionizing radiation	Ionizing radiation-Human health (DALY)	1	ENV+SAF+ECO
2021	Tian et al	Tian et al2021	0	Scientific article	Academia	https://doi.org/10.1016/j.scitotenv.2021.145049	Materials	Plastics	not specified	1	0	0	0	0	Environmental	Acidification	Terrestrial acidification (kg SO2eq)	1	ENV+SAF+ECO
2021	Tian et al	Tian et al2021	0	Scientific article	Academia	https://doi.org/10.1016/j.scitotenv.2021.145049	Materials	Plastics	not specified	1	0	0	0	0	Environmental	Eutrophication	Marine eutrophication potential (mol N eq)	1	ENV+SAF+ECO
2021	Tian et al	Tian et al2021	0	Scientific article	Academia	https://doi.org/10.1016/j.scitotenv.2021.145049	Materials	Plastics	not specified	1	0	0	0	0	Environmental	Eutrophication	Freshwater eutrophication potential (kg P eq)	1	ENV+SAF+ECO
2021	Tian et al	Tian et al2021	0	Scientific article	Academia	https://doi.org/10.1016/j.scitotenv.2021.145049	Materials	Plastics	not specified	1	0	0	0	0	Environmental	Stratospheric ozone Depletion	Ozone depletion potential (kg CFC-11)	1	ENV+SAF+ECO
2021	Tian et al	Tian et al2021	0	Scientific article	Academia	https://doi.org/10.1016/j.scitotenv.2021.145049	Materials	Plastics	not specified	1	0	0	0	0	Environmental	Resources	Land occupation (m2a crop eq)	1	ENV+SAF+ECO
2021	Tian et al	Tian et al2021	0	Scientific article	Academia	https://doi.org/10.1016/j.scitotenv.2021.145049	Materials	Plastics	not specified	1	0	0	0	0	Environmental	Resources	Fossil resource scarcity (kg oil eq)	1	ENV+SAF+ECO
2021	Tian et al	Tian et al2021	0	Scientific article	Academia	https://doi.org/10.1016/j.scitotenv.2021.145049	Materials	Plastics	not specified	1	0	0	0	0	Environmental	Resources	Mineral resources scarcity (kg Cu eq)	1	ENV+SAF+ECO
2021	Tian et al	Tian et al2021	0	Scientific article	Academia	https://doi.org/10.1016/j.scitotenv.2021.145049	Materials	Plastics	not specified	1	0	0	0	0	Environmental	Resources	Resources depletion ($)	1	ENV+SAF+ECO
2021	Tian et al	Tian et al2021	0	Scientific article	Academia	https://doi.org/10.1016/j.scitotenv.2021.145049	Materials	Plastics	not specified	1	0	0	0	0	Environmental	Integrated Assessment	Ecosystems (species.yr)	1	ENV+SAF+ECO
2021	Tian et al	Tian et al2021	0	Scientific article	Academia	https://doi.org/10.1016/j.scitotenv.2021.145049	Materials	Plastics	not specified	1	0	0	0	0	Environmental	Integrated Assessment	Human Health (DALY)	1	ENV+SAF+ECO
2021	Tian et al	Tian et al2021	0	Scientific article	Academia	https://doi.org/10.1016/j.scitotenv.2021.145049	Materials	Plastics	not specified	1	0	0	0	0	Resources-, processing, and product- related	Resources: types, quantity, and efficiency considerations	Water consumption (m3)	1	ENV+SAF+ECO
2021	Tian et al	Tian et al2021	0	Scientific article	Academia	https://doi.org/10.1016/j.scitotenv.2021.145049	Materials	Plastics	not specified	1	0	0	0	0	Economic	External cost	Life cycle cost	1	ENV+SAF+ECO
2021	UN	UN2021	1	Guidance	International organisation	https://wedocs.unep.org/bitstream/handle/20.500.11822/35312/GSCF_ES.pdf?sequence=1&isAllowed=y	Chemicals	not specified		1	0	0	0	1	Environmental	Climate Change	Climate change (conceptual)	1	ENV+SAF+SOC
2021	UN	UN2021	1	Guidance	International organisation	https://wedocs.unep.org/bitstream/handle/20.500.11822/35312/GSCF_ES.pdf?sequence=1&isAllowed=y	Chemicals	not specified		1	0	0	0	1	Environmental	Resources	Limiting depletion of fossil/mineral resources (conceptual)	1	ENV+SAF+SOC
2021	UN	UN2021	1	Guidance	International organisation	https://wedocs.unep.org/bitstream/handle/20.500.11822/35312/GSCF_ES.pdf?sequence=1&isAllowed=y	Chemicals	not specified		1	0	0	0	1	Environmental	Integrated Assessment	Biodiversity protection (conceptual)	1	ENV+SAF+SOC
2021	UN	UN2021	1	Guidance	International organisation	https://wedocs.unep.org/bitstream/handle/20.500.11822/35312/GSCF_ES.pdf?sequence=1&isAllowed=y	Chemicals	not specified		1	0	0	0	1	Resources-, processing, and product- related	Resources: types, quantity, and efficiency considerations	Renewable or fossil? (yes/no)	1	ENV+SAF+SOC
2021	UN	UN2021	1	Guidance	International organisation	https://wedocs.unep.org/bitstream/handle/20.500.11822/35312/GSCF_ES.pdf?sequence=1&isAllowed=y	Chemicals	not specified		1	0	0	0	1	Resources-, processing, and product- related	Resources: types, quantity, and efficiency considerations	Material intensity index (%)	1	ENV+SAF+SOC
2021	UN	UN2021	1	Guidance	International organisation	https://wedocs.unep.org/bitstream/handle/20.500.11822/35312/GSCF_ES.pdf?sequence=1&isAllowed=y	Chemicals	not specified		1	0	0	0	1	Resources-, processing, and product- related	Resources: types, quantity, and efficiency considerations	E-factor (%)	1	ENV+SAF+SOC
2021	UN	UN2021	1	Guidance	International organisation	https://wedocs.unep.org/bitstream/handle/20.500.11822/35312/GSCF_ES.pdf?sequence=1&isAllowed=y	Chemicals	not specified		1	0	0	0	1	Resources-, processing, and product- related	Circularity	Recyclability/circularity (conceptual)	1	ENV+SAF+SOC
2021	UN	UN2021	1	Guidance	International organisation	https://wedocs.unep.org/bitstream/handle/20.500.11822/35312/GSCF_ES.pdf?sequence=1&isAllowed=y	Chemicals	not specified		1	0	0	0	1	Resources-, processing, and product- related	Biodegradability	Biodegradability (conceptual)	1	ENV+SAF+SOC
2021	UN	UN2021	1	Guidance	International organisation	https://wedocs.unep.org/bitstream/handle/20.500.11822/35312/GSCF_ES.pdf?sequence=1&isAllowed=y	Chemicals	not specified		1	0	0	0	1	Social	workers	Respect for the national standards for security and social responsibility	1	ENV+SAF+SOC
2021	UN	UN2021	1	Guidance	International organisation	https://wedocs.unep.org/bitstream/handle/20.500.11822/35312/GSCF_ES.pdf?sequence=1&isAllowed=y	Chemicals	not specified		1	0	0	0	1	Social	workers	Child labour	1	ENV+SAF+SOC
2021	UN	UN2021	1	Guidance	International organisation	https://wedocs.unep.org/bitstream/handle/20.500.11822/35312/GSCF_ES.pdf?sequence=1&isAllowed=y	Chemicals	not specified		1	0	0	0	1	Social	workers	Forced labour	1	ENV+SAF+SOC
2021	VinylPlus	VinylPlus2021	0	Certification	Certification schemes	https://productlabel.vinylplus.eu/wp-content/uploads/2021/07/Product-Label-Brochure-EN_-8JUNE2021.pdf	Materials	Plastics	not specified	1	0	0	0	1	Environmental	Climate Change	GWP 100 (kg CO₂eq)	1	ENV
2021	VinylPlus	VinylPlus2021	0	Certification	Certification schemes	https://productlabel.vinylplus.eu/wp-content/uploads/2021/07/Product-Label-Brochure-EN_-8JUNE2021.pdf	Materials	Plastics	not specified	1	0	0	0	1	Environmental	Toxicity	Ecotoxicity (not specified)	1	ENV
2021	VinylPlus	VinylPlus2021	0	Certification	Certification schemes	https://productlabel.vinylplus.eu/wp-content/uploads/2021/07/Product-Label-Brochure-EN_-8JUNE2021.pdf	Materials	Plastics	not specified	1	0	0	0	1	Environmental	Eutrophication	Eutrophication potential (kg of phosphate )	1	ENV
2021	VinylPlus	VinylPlus2021	0	Certification	Certification schemes	https://productlabel.vinylplus.eu/wp-content/uploads/2021/07/Product-Label-Brochure-EN_-8JUNE2021.pdf	Materials	Plastics	not specified	1	0	0	0	1	Environmental	Stratospheric ozone Depletion	Ozone depletion potential (kg CFC-11)	1	ENV
2021	VinylPlus	VinylPlus2021	0	Certification	Certification schemes	https://productlabel.vinylplus.eu/wp-content/uploads/2021/07/Product-Label-Brochure-EN_-8JUNE2021.pdf	Materials	Plastics	not specified	1	0	0	0	1	Environmental	Air emission	Atmospheric VOC emissions (g)	1	ENV
2021	VinylPlus	VinylPlus2021	0	Certification	Certification schemes	https://productlabel.vinylplus.eu/wp-content/uploads/2021/07/Product-Label-Brochure-EN_-8JUNE2021.pdf	Materials	Plastics	not specified	1	0	0	0	1	Environmental	Air emission	Dimethylformamide (g)	1	ENV
2021	Blue Angel	Blue Angel2021	0	Certification	Certification schemes	https://www.blauer-engel.de/sites/default/files/sidebar/downloads/be-factsheet-prinzipien-en.pdf	Products	not specified	not specified	0	1	0	0	0	Resources-, processing, and product- related	Resources: types, quantity, and efficiency considerations	Water consumption (m3)	1	SAF+SOC
2021	Blue Angel	Blue Angel2021	0	Certification	Certification schemes	https://www.blauer-engel.de/sites/default/files/sidebar/downloads/be-factsheet-prinzipien-en.pdf	Products	not specified	not specified	0	1	0	0	0	Resources-, processing, and product- related	Circularity	Recycled content (%)	1	SAF+SOC
2021	Blue Angel	Blue Angel2021	0	Certification	Certification schemes	https://www.blauer-engel.de/sites/default/files/sidebar/downloads/be-factsheet-prinzipien-en.pdf	Products	not specified	not specified	0	1	0	0	0	Resources-, processing, and product- related	Circularity	Disassembly/reparability design (conceptual)	1	SAF+SOC
2021	Blue Angel	Blue Angel2021	0	Certification	Certification schemes	https://www.blauer-engel.de/sites/default/files/sidebar/downloads/be-factsheet-prinzipien-en.pdf	Products	not specified	not specified	0	1	0	0	0	Resources-, processing, and product- related	Energy	Energy consumption (kWh or MJ)	1	SAF+SOC
2021	Blue Angel	Blue Angel2021	0	Certification	Certification schemes	https://www.blauer-engel.de/sites/default/files/sidebar/downloads/be-factsheet-prinzipien-en.pdf	Products	not specified	not specified	0	1	0	0	0	Social	workers	Noise reduction	1	SAF+SOC
2021	Bluesign	Bluesign2021	0	Certification	Certification schemes	https://www.bluesign.com/en	Materials	Textiles		0	0	0	0	1	Resources-, processing, and product- related	Resources: types, quantity, and efficiency considerations	Water consumption (m3)	1	SAF
2021	Bluesign	Bluesign2021	0	Certification	Certification schemes	https://www.bluesign.com/en	Materials	Textiles		0	0	0	0	1	Resources-, processing, and product- related	Resources: types, quantity, and efficiency considerations	Amount of (solid/water) waste (kg or %)	1	SAF
2021	Bluesign	Bluesign2021	0	Certification	Certification schemes	https://www.bluesign.com/en	Materials	Textiles		0	0	0	0	1	Resources-, processing, and product- related	Energy	Energy consumption (kWh or MJ)	1	SAF
2021	Clariant Eco Tain	Clariant Eco Tain2021	0	Certification	Industry	https://www.clariant.com/en/Sustainability/Safe-and-Sustainable-Solutions/Discover-Ecotain	Chemicals	not specified		1	0	0	0	1	Environmental	Climate Change	GWP 100 (kg CO₂eq)	1	ENV+SAF+ECO
2021	Clariant Eco Tain	Clariant Eco Tain2021	0	Certification	Industry	https://www.clariant.com/en/Sustainability/Safe-and-Sustainable-Solutions/Discover-Ecotain	Chemicals	not specified		1	0	0	0	1	Environmental	Resources	Water depletion potential (m3eq)	1	ENV+SAF+ECO
2021	Clariant Eco Tain	Clariant Eco Tain2021	0	Certification	Industry	https://www.clariant.com/en/Sustainability/Safe-and-Sustainable-Solutions/Discover-Ecotain	Chemicals	not specified		1	0	0	0	1	Environmental	Integrated Assessment	Biodiversity protection (conceptual)	1	ENV+SAF+ECO
2021	Clariant Eco Tain	Clariant Eco Tain2021	0	Certification	Industry	https://www.clariant.com/en/Sustainability/Safe-and-Sustainable-Solutions/Discover-Ecotain	Chemicals	not specified		1	0	0	0	1	Resources-, processing, and product- related	Resources: types, quantity, and efficiency considerations	Renewable or fossil? (yes/no)	1	ENV+SAF+ECO
2021	Clariant Eco Tain	Clariant Eco Tain2021	0	Certification	Industry	https://www.clariant.com/en/Sustainability/Safe-and-Sustainable-Solutions/Discover-Ecotain	Chemicals	not specified		1	0	0	0	1	Resources-, processing, and product- related	Resources: types, quantity, and efficiency considerations	Water consumption (m3)	1	ENV+SAF+ECO
2021	Clariant Eco Tain	Clariant Eco Tain2021	0	Certification	Industry	https://www.clariant.com/en/Sustainability/Safe-and-Sustainable-Solutions/Discover-Ecotain	Chemicals	not specified		1	0	0	0	1	Resources-, processing, and product- related	Resources: types, quantity, and efficiency considerations	Net mass of materials consumed (kg)	1	ENV+SAF+ECO
2021	Clariant Eco Tain	Clariant Eco Tain2021	0	Certification	Industry	https://www.clariant.com/en/Sustainability/Safe-and-Sustainable-Solutions/Discover-Ecotain	Chemicals	not specified		1	0	0	0	1	Resources-, processing, and product- related	Resources: types, quantity, and efficiency considerations	Amount of (solid/water) waste (kg or %)	1	ENV+SAF+ECO
2021	Clariant Eco Tain	Clariant Eco Tain2021	0	Certification	Industry	https://www.clariant.com/en/Sustainability/Safe-and-Sustainable-Solutions/Discover-Ecotain	Chemicals	not specified		1	0	0	0	1	Resources-, processing, and product- related	Resources: types, quantity, and efficiency considerations	Reaction efficiency (%)	1	ENV+SAF+ECO
2021	Clariant Eco Tain	Clariant Eco Tain2021	0	Certification	Industry	https://www.clariant.com/en/Sustainability/Safe-and-Sustainable-Solutions/Discover-Ecotain	Chemicals	not specified		1	0	0	0	1	Resources-, processing, and product- related	Circularity	Recyclability/circularity (conceptual)	1	ENV+SAF+ECO
2021	Clariant Eco Tain	Clariant Eco Tain2021	0	Certification	Industry	https://www.clariant.com/en/Sustainability/Safe-and-Sustainable-Solutions/Discover-Ecotain	Chemicals	not specified		1	0	0	0	1	Resources-, processing, and product- related	Circularity	Recycled content (%)	1	ENV+SAF+ECO
2021	Clariant Eco Tain	Clariant Eco Tain2021	0	Certification	Industry	https://www.clariant.com/en/Sustainability/Safe-and-Sustainable-Solutions/Discover-Ecotain	Chemicals	not specified		1	0	0	0	1	Resources-, processing, and product- related	Biodegradability	Biodegradability (conceptual)	1	ENV+SAF+ECO
2021	Clariant Eco Tain	Clariant Eco Tain2021	0	Certification	Industry	https://www.clariant.com/en/Sustainability/Safe-and-Sustainable-Solutions/Discover-Ecotain	Chemicals	not specified		1	0	0	0	1	Resources-, processing, and product- related	Energy	Energy consumption (kWh or MJ)	1	ENV+SAF+ECO
2021	Clariant Eco Tain	Clariant Eco Tain2021	0	Certification	Industry	https://www.clariant.com/en/Sustainability/Safe-and-Sustainable-Solutions/Discover-Ecotain	Chemicals	not specified		1	0	0	0	1	Resources-, processing, and product- related	Energy	Energy efficiency (%)	1	ENV+SAF+ECO
2021	Clariant Eco Tain	Clariant Eco Tain2021	0	Certification	Industry	https://www.clariant.com/en/Sustainability/Safe-and-Sustainable-Solutions/Discover-Ecotain	Chemicals	not specified		1	0	0	0	1	Economic	Profitability	Financial profit (€)	1	ENV+SAF+ECO
2021	GOTS	GOTS2021	0	Certification	Certification schemes	https://global-standard.org/	Materials	Textiles		0	0	0	0	0	Resources-, processing, and product- related	Resources: types, quantity, and efficiency considerations	Renewable or fossil? (yes/no)	1	SAF+SOC
2021	GOTS	GOTS2021	0	Certification	Certification schemes	https://global-standard.org/	Materials	Textiles		0	0	0	0	0	Resources-, processing, and product- related	Biodegradability	Biodegradability (conceptual)	1	SAF+SOC
2021	GOTS	GOTS2021	0	Certification	Certification schemes	https://global-standard.org/	Materials	Textiles		0	0	0	0	0	Social	workers	Workers health & safety	1	SAF+SOC
2021	GOTS	GOTS2021	0	Certification	Certification schemes	https://global-standard.org/	Materials	Textiles		0	0	0	0	0	Social	workers	Equal opportunities and discrimination	1	SAF+SOC
2021	GOTS	GOTS2021	0	Certification	Certification schemes	https://global-standard.org/	Materials	Textiles		0	0	0	0	0	Social	workers	Child labour	1	SAF+SOC
2021	GOTS	GOTS2021	0	Certification	Certification schemes	https://global-standard.org/	Materials	Textiles		0	0	0	0	0	Social	workers	Forced labour	1	SAF+SOC
2021	GOTS	GOTS2021	0	Certification	Certification schemes	https://global-standard.org/	Materials	Textiles		0	0	0	0	0	Social	workers	Sexual harassment	1	SAF+SOC
2021	GOTS	GOTS2021	0	Certification	Certification schemes	https://global-standard.org/	Materials	Textiles		0	0	0	0	0	Social	workers	Freedom of association and collective bargaining	1	SAF+SOC
2021	GOTS	GOTS2021	0	Certification	Certification schemes	https://global-standard.org/	Materials	Textiles		0	0	0	0	0	Social	workers	Fair salary	1	SAF+SOC
2021	GOTS	GOTS2021	0	Certification	Certification schemes	https://global-standard.org/	Materials	Textiles		0	0	0	0	0	Social	workers	Working hours (e.g. maximum)/work-file balance	1	SAF+SOC
2021	Green Seal	Green Seal2021	0	Certification	Certification schemes	https://www.greenseal.org/about/faq	Products	not specified		0	1	0	0	0	Resources-, processing, and product- related	Resources: types, quantity, and efficiency considerations	Water consumption (m3)	1	SAF+SOC
2021	Green Seal	Green Seal2021	0	Certification	Certification schemes	https://www.greenseal.org/about/faq	Products	not specified		0	1	0	0	0	Resources-, processing, and product- related	Resources: types, quantity, and efficiency considerations	Amount of (solid/water) waste (kg or %)	1	SAF+SOC
2021	Green Seal	Green Seal2021	0	Certification	Certification schemes	https://www.greenseal.org/about/faq	Products	not specified		0	1	0	0	0	Resources-, processing, and product- related	Circularity	Recyclability/circularity (conceptual)	1	SAF+SOC
2021	Green Seal	Green Seal2021	0	Certification	Certification schemes	https://www.greenseal.org/about/faq	Products	not specified		0	1	0	0	0	Social	workers	Equal opportunities and discrimination	1	SAF+SOC
2021	Green Seal	Green Seal2021	0	Certification	Certification schemes	https://www.greenseal.org/about/faq	Products	not specified		0	1	0	0	0	Social	workers	Forced labour	1	SAF+SOC
2021	Greensuite®	Greensuite® 2021	0	Tool	Industry	http://d1.doi.org/10.1002/ieam.1757	Products	not specified		1	0	0	0	1	Environmental	Climate Change	GWP 100 (kg CO₂eq)	1	ENV+SAF
2021	Greensuite®	Greensuite® 2021	0	Tool	Industry	http://d1.doi.org/10.1002/ieam.1757	Products	not specified		1	0	0	0	1	Environmental	Acidification	Acidification potential (molc H+ eq)	1	ENV+SAF
2021	Greensuite®	Greensuite® 2021	0	Tool	Industry	http://d1.doi.org/10.1002/ieam.1757	Products	not specified		1	0	0	0	1	Environmental	Eutrophication	Freshwater eutrophication potential (kg P eq)	1	ENV+SAF
2021	Greensuite®	Greensuite® 2021	0	Tool	Industry	http://d1.doi.org/10.1002/ieam.1757	Products	not specified		1	0	0	0	1	Environmental	Stratospheric ozone Depletion	Ozone depletion potential (kg CFC-11)	1	ENV+SAF
2021	Greensuite®	Greensuite® 2021	0	Tool	Industry	http://d1.doi.org/10.1002/ieam.1757	Products	not specified		1	0	0	0	1	Environmental	Photochemical Ozone Formation	POCP (kg of ethene-eq or Kg NMVOC or kg O3)	1	ENV+SAF
2021	Greensuite®	Greensuite® 2021	0	Tool	Industry	http://d1.doi.org/10.1002/ieam.1757	Products	not specified		1	0	0	0	1	Environmental	Water emission	Biological oxigen demand 5 (g)	1	ENV+SAF
2021	Greensuite®	Greensuite® 2021	0	Tool	Industry	http://d1.doi.org/10.1002/ieam.1757	Products	not specified		1	0	0	0	1	Resources-, processing, and product- related	Resources: types, quantity, and efficiency considerations	Water consumption (m3)	1	ENV+SAF
2021	Greensuite®	Greensuite® 2021	0	Tool	Industry	http://d1.doi.org/10.1002/ieam.1757	Products	not specified		1	0	0	0	1	Resources-, processing, and product- related	Resources: types, quantity, and efficiency considerations	Amount of (solid/water) waste (kg or %)	1	ENV+SAF
2021	Greensuite®	Greensuite® 2021	0	Tool	Industry	http://d1.doi.org/10.1002/ieam.1757	Products	not specified		1	0	0	0	1	Resources-, processing, and product- related	Energy	Energy consumption (kWh or MJ)	1	ENV+SAF
2021	Higg product tool	Higg product tool2021	0	Certification	Certification schemes	https://apparelcoalition.org/the-higg-inde1/	Materials	Textiles		1	0	0	0	1	Environmental	Climate Change	GWP 100 (kg CO₂eq)	1	ENV
2021	Higg product tool	Higg product tool2021	0	Certification	Certification schemes	https://apparelcoalition.org/the-higg-inde1/	Materials	Textiles		1	0	0	0	1	Environmental	Eutrophication	Freshwater eutrophication potential (kg P eq)	1	ENV
2021	Higg product tool	Higg product tool2021	0	Certification	Certification schemes	https://apparelcoalition.org/the-higg-inde1/	Materials	Textiles		1	0	0	0	1	Environmental	Resources	Water depletion potential (m3eq)	1	ENV
2021	Higg product tool	Higg product tool2021	0	Certification	Certification schemes	https://apparelcoalition.org/the-higg-inde1/	Materials	Textiles		1	0	0	0	1	Environmental	Resources	Resource use/depletion - fossil (MJ)	1	ENV
2021	Nordic Swan Ecolabel	Nordic Swan Ecolabel2021	0	Certification	Certification schemes	https://www.nordic-ecolabel.org/	Products	not specified		0	0	0	0	0	Resources-, processing, and product- related	Resources: types, quantity, and efficiency considerations	Water consumption (m3)	1	SAF+SOC
2021	Nordic Swan Ecolabel	Nordic Swan Ecolabel2021	0	Certification	Certification schemes	https://www.nordic-ecolabel.org/	Products	not specified		0	0	0	0	0	Resources-, processing, and product- related	Resources: types, quantity, and efficiency considerations	Amount of (solid/water) waste (kg or %)	1	SAF+SOC
2021	Nordic Swan Ecolabel	Nordic Swan Ecolabel2021	0	Certification	Certification schemes	https://www.nordic-ecolabel.org/	Products	not specified		0	0	0	0	0	Resources-, processing, and product- related	Circularity	Disassembly/reparability design (conceptual)	1	SAF+SOC
2021	Nordic Swan Ecolabel	Nordic Swan Ecolabel2021	0	Certification	Certification schemes	https://www.nordic-ecolabel.org/	Products	not specified		0	0	0	0	0	Resources-, processing, and product- related	Circularity	Durability (years)	1	SAF+SOC
2021	Nordic Swan Ecolabel	Nordic Swan Ecolabel2021	0	Certification	Certification schemes	https://www.nordic-ecolabel.org/	Products	not specified		0	0	0	0	0	Resources-, processing, and product- related	Circularity	Recycling efficiency/recovery rate (%)	1	SAF+SOC
2021	Nordic Swan Ecolabel	Nordic Swan Ecolabel2021	0	Certification	Certification schemes	https://www.nordic-ecolabel.org/	Products	not specified		0	0	0	0	0	Resources-, processing, and product- related	Biodegradability	Marine biodegradability (conceptual)	1	SAF+SOC
2021	Nordic Swan Ecolabel	Nordic Swan Ecolabel2021	0	Certification	Certification schemes	https://www.nordic-ecolabel.org/	Products	not specified		0	0	0	0	0	Resources-, processing, and product- related	Biodegradability	Soil biodegradability (conceptual)	1	SAF+SOC
2021	Nordic Swan Ecolabel	Nordic Swan Ecolabel2021	0	Certification	Certification schemes	https://www.nordic-ecolabel.org/	Products	not specified		0	0	0	0	0	Resources-, processing, and product- related	Energy	Energy consumption (kWh or MJ)	1	SAF+SOC
2021	Nordic Swan Ecolabel	Nordic Swan Ecolabel2021	0	Certification	Certification schemes	https://www.nordic-ecolabel.org/	Products	not specified		0	0	0	0	0	Social	value chain actors	Tracking capacity	1	SAF+SOC
2021	Okokpujie	Okokpujie2021	0	Scientific article	Academia	Implementation of multi-criteria decision method for selection of suitable material for development of horizontal wind turbine blade for sustainable energy generation - ScienceDirect	Materials	not specified	Aviation	0	0	1	0	0	Economic	Internal cost	(Total) production cost (€)	1	ECO
2021	TCO certified	TCO certified2021	0	Certification	Certification schemes	https://tcocertified.com/criteria-documents/	Products		IT	0	0	0	0	1	Resources-, processing, and product- related	Circularity	Recycled content (%)	1	SAF+SOC
2021	TCO certified	TCO certified2021	0	Certification	Certification schemes	https://tcocertified.com/criteria-documents/	Products		IT	0	0	0	0	1	Resources-, processing, and product- related	Circularity	Recyclabile? (yes/no)	1	SAF+SOC
2021	TCO certified	TCO certified2021	0	Certification	Certification schemes	https://tcocertified.com/criteria-documents/	Products		IT	0	0	0	0	1	Resources-, processing, and product- related	Circularity	Disassembly/reparability design (conceptual)	1	SAF+SOC
2021	TCO certified	TCO certified2021	0	Certification	Certification schemes	https://tcocertified.com/criteria-documents/	Products		IT	0	0	0	0	1	Resources-, processing, and product- related	Circularity	Durability (years)	1	SAF+SOC
2021	TCO certified	TCO certified2021	0	Certification	Certification schemes	https://tcocertified.com/criteria-documents/	Products		IT	0	0	0	0	1	Resources-, processing, and product- related	Energy	Energy consumption (kWh or MJ)	1	SAF+SOC
2021	TCO certified	TCO certified2021	0	Certification	Certification schemes	https://tcocertified.com/criteria-documents/	Products		IT	0	0	0	0	1	Resources-, processing, and product- related	Energy	Energy efficiency (%)	1	SAF+SOC
2021	TCO certified	TCO certified2021	0	Certification	Certification schemes	https://tcocertified.com/criteria-documents/	Products		IT	0	0	0	0	1	Social	value chain actors	Tracking capacity	1	SAF+SOC
2021	TCO certified	TCO certified2021	0	Certification	Certification schemes	https://tcocertified.com/criteria-documents/	Products		IT	0	0	0	0	1	Social	workers	Noise reduction	1	SAF+SOC
2021	TCO certified	TCO certified2021	0	Certification	Certification schemes	https://tcocertified.com/criteria-documents/	Products		IT	0	0	0	0	1	Social	workers	Respect for the national standards for security and social responsibility	1	SAF+SOC
2021	TCO certified	TCO certified2021	0	Certification	Certification schemes	https://tcocertified.com/criteria-documents/	Products		IT	0	0	0	0	1	Social	workers	Child labour	1	SAF+SOC
2021	TCO certified	TCO certified2021	0	Certification	Certification schemes	https://tcocertified.com/criteria-documents/	Products		IT	0	0	0	0	1	Social	workers	Fair salary	1	SAF+SOC
2021	TCO certified	TCO certified2021	0	Certification	Certification schemes	https://tcocertified.com/criteria-documents/	Products		IT	0	0	0	0	1	Social	workers	Working hours (e.g. maximum)/work-file balance	1	SAF+SOC
2022	Acar et al	Acar et al2022	0	Scientific article	Academia	https://www.sciencedirect.com/science/article/pii/S0360319921039756	Chemicals	Fuels		0	0	1	0	0	Environmental	Climate Change	GWP 100 (kg CO₂eq)	1	ENV+SAF+SOC
2022	Acar et al	Acar et al2022	0	Scientific article	Academia	https://www.sciencedirect.com/science/article/pii/S0360319921039756	Chemicals	Fuels		0	0	1	0	0	Environmental	Resources	Land use (not specified)	1	ENV+SAF+SOC
2022	Acar et al	Acar et al2022	0	Scientific article	Academia	https://www.sciencedirect.com/science/article/pii/S0360319921039756	Chemicals	Fuels		0	0	1	0	0	Environmental	Integrated Assessment	Influence/Impact on public health	1	ENV+SAF+SOC
2022	Acar et al	Acar et al2022	0	Scientific article	Academia	https://www.sciencedirect.com/science/article/pii/S0360319921039756	Chemicals	Fuels		0	0	1	0	0	Environmental	Water emission	Water Discharge quality	1	ENV+SAF+SOC
2022	Acar et al	Acar et al2022	0	Scientific article	Academia	https://www.sciencedirect.com/science/article/pii/S0360319921039756	Chemicals	Fuels		0	0	1	0	0	Resources-, processing, and product- related	Resources: types, quantity, and efficiency considerations	Solid waste generation	1	ENV+SAF+SOC
2022	Acar et al	Acar et al2022	0	Scientific article	Academia	https://www.sciencedirect.com/science/article/pii/S0360319921039756	Chemicals	Fuels		0	0	1	0	0	Resources-, processing, and product- related	Energy	Energy efficiency (%)	1	ENV+SAF+SOC
2022	Acar et al	Acar et al2022	0	Scientific article	Academia	https://www.sciencedirect.com/science/article/pii/S0360319921039756	Chemicals	Fuels		0	0	1	0	0	Social	local community	Local employment	1	ENV+SAF+SOC
2022	Acar et al	Acar et al2022	0	Scientific article	Academia	https://www.sciencedirect.com/science/article/pii/S0360319921039756	Chemicals	Fuels		0	0	1	0	0	Social	local community	Community acceptance	1	ENV+SAF+SOC
2022	Acar et al	Acar et al2022	0	Scientific article	Academia	https://www.sciencedirect.com/science/article/pii/S0360319921039756	Chemicals	Fuels		0	0	1	0	0	Social	workers	Part time work	1	ENV+SAF+SOC
2022	Hap et al	Hap et al2022	0	Scientific article	Academia	https://www.sciencedirect.com/science/article/pii/S1568494622006172	Materials	not specified	Aviation	0	0	1	0	0	Environmental	Climate Change	GWP 100 (kg CO₂eq)	1	ENV+SAF+ECO
2022	Hap et al	Hap et al2022	0	Scientific article	Academia	https://www.sciencedirect.com/science/article/pii/S1568494622006172	Materials	not specified	Aviation	0	0	1	0	0	Resources-, processing, and product- related	Circularity	Recyclability/circularity (conceptual)	1	ENV+SAF+ECO
2022	Hap et al	Hap et al2022	0	Scientific article	Academia	https://www.sciencedirect.com/science/article/pii/S1568494622006172	Materials	not specified	Aviation	0	0	1	0	0	Economic	Internal cost	Purchase cost	1	ENV+SAF+ECO
2022	Hossain et al	Hossain et al2022	1	Scientific article	Academia	Designing sustainable concrete mixes with potentially alternative binder systems: Multicriteria decision making process - ScienceDirect	Materials	Building materials	Construction	1	0	1	0	0	Environmental	Climate Change	GWP 100 (kg CO₂eq)	1	ENV+ECO
2022	Hossain et al	Hossain et al2022	1	Scientific article	Academia	Designing sustainable concrete mixes with potentially alternative binder systems: Multicriteria decision making process - ScienceDirect	Materials	Building materials	Construction	1	0	1	0	0	Environmental	Acidification	Acidification potential (molc H+ eq)	1	ENV+ECO
2022	Hossain et al	Hossain et al2022	1	Scientific article	Academia	Designing sustainable concrete mixes with potentially alternative binder systems: Multicriteria decision making process - ScienceDirect	Materials	Building materials	Construction	1	0	1	0	0	Environmental	Resources	Resource use/depletion - fossil (MJ)	1	ENV+ECO
2022	Hossain et al	Hossain et al2022	1	Scientific article	Academia	Designing sustainable concrete mixes with potentially alternative binder systems: Multicriteria decision making process - ScienceDirect	Materials	Building materials	Construction	1	0	1	0	0	Environmental	Toxicity	Respiratory inorganics	1	ENV+ECO
2022	Hossain et al	Hossain et al2022	1	Scientific article	Academia	Designing sustainable concrete mixes with potentially alternative binder systems: Multicriteria decision making process - ScienceDirect	Materials	Building materials	Construction	1	0	1	0	0	Economic	Internal cost	(Total) production cost (€)	1	ENV+ECO
2022	Janošovský et al	Janošovský et al2022	0	Scientific article	Academia	https://www.sciencedirect.com/science/article/pii/S0196890422005180	Chemicals	Fuels		0	0	1	0	0	Environmental	Climate Change	C factor	1	ENV+SAF+ECO
2022	Janošovský et al	Janošovský et al2022	0	Scientific article	Academia	https://www.sciencedirect.com/science/article/pii/S0196890422005180	Chemicals	Fuels		0	0	1	0	0	Environmental	Integrated Assessment	Eco-indicator 99 total [-]	1	ENV+SAF+ECO
2022	Janošovský et al	Janošovský et al2022	0	Scientific article	Academia	https://www.sciencedirect.com/science/article/pii/S0196890422005180	Chemicals	Fuels		0	0	1	0	0	Resources-, processing, and product- related	Resources: types, quantity, and efficiency considerations	E-factor (%)	1	ENV+SAF+ECO
2022	Janošovský et al	Janošovský et al2022	0	Scientific article	Academia	https://www.sciencedirect.com/science/article/pii/S0196890422005180	Chemicals	Fuels		0	0	1	0	0	Resources-, processing, and product- related	Energy	Energy consumption (kWh or MJ)	1	ENV+SAF+ECO
2022	Janošovský et al	Janošovský et al2022	0	Scientific article	Academia	https://www.sciencedirect.com/science/article/pii/S0196890422005180	Chemicals	Fuels		0	0	1	0	0	Economic	Other	TCC (Total Capital Cost)	1	ENV+SAF+ECO
2022	Janošovský et al	Janošovský et al2022	0	Scientific article	Academia	https://www.sciencedirect.com/science/article/pii/S0196890422005180	Chemicals	Fuels		0	0	1	0	0	Economic	Other	TPC (Total Production Cost)	1	ENV+SAF+ECO
2022	Markatos and Pantelakis	Markatos and Pantelakis2022	0	Scientific article	Academia	Aerospace | Free Full-Text | Assessment of the Impact of Material Selection on Aviation Sustainability, from a Circular Economy Perspective (mdpi.com)	Materials	not specified	Aviation	1	0	1	0	0	Environmental	Climate Change	GWP 100 (kg CO₂eq)	1	ENV+ECO
2022	Markatos and Pantelakis	Markatos and Pantelakis2022	0	Scientific article	Academia	Aerospace | Free Full-Text | Assessment of the Impact of Material Selection on Aviation Sustainability, from a Circular Economy Perspective (mdpi.com)	Materials	not specified	Aviation	1	0	1	0	0	Economic	Internal cost	(Total) production cost (€)	1	ENV+ECO
2022	Opn	Opn2022	1	Scientific article	Academia	Implementation of a multicriteria analytical framework for the sustainability evaluation and comparison of concrete materials considering methodological uncertainties - ScienceDirect	Materials	Building materials	Construction	1	0	1	1	0	Environmental	Climate Change	GWP 100 (kg CO₂eq)	1	ENV+SAF
2022	Opn	Opn2022	1	Scientific article	Academia	Implementation of a multicriteria analytical framework for the sustainability evaluation and comparison of concrete materials considering methodological uncertainties - ScienceDirect	Materials	Building materials	Construction	1	0	1	1	0	Environmental	Particulate Matter	Particulate matter (PM 2.5eq)	1	ENV+SAF
2022	Opn	Opn2022	1	Scientific article	Academia	Implementation of a multicriteria analytical framework for the sustainability evaluation and comparison of concrete materials considering methodological uncertainties - ScienceDirect	Materials	Building materials	Construction	1	0	1	1	0	Environmental	Air emission	Atmospheric NOx emissions (g)	1	ENV+SAF
2022	Opn	Opn2022	1	Scientific article	Academia	Implementation of a multicriteria analytical framework for the sustainability evaluation and comparison of concrete materials considering methodological uncertainties - ScienceDirect	Materials	Building materials	Construction	1	0	1	1	0	Environmental	Air emission	Dimethylformamide (g)	1	ENV+SAF
2022	Opn	Opn2022	1	Scientific article	Academia	Implementation of a multicriteria analytical framework for the sustainability evaluation and comparison of concrete materials considering methodological uncertainties - ScienceDirect	Materials	Building materials	Construction	1	0	1	1	0	Resources-, processing, and product- related	Resources: types, quantity, and efficiency considerations	Water consumption (m3)	1	ENV+SAF
2022	Opn	Opn2022	1	Scientific article	Academia	Implementation of a multicriteria analytical framework for the sustainability evaluation and comparison of concrete materials considering methodological uncertainties - ScienceDirect	Materials	Building materials	Construction	1	0	1	1	0	Resources-, processing, and product- related	Resources: types, quantity, and efficiency considerations	Raw materails consumption (Kg/ton)	1	ENV+SAF
2022	Opn	Opn2022	1	Scientific article	Academia	Implementation of a multicriteria analytical framework for the sustainability evaluation and comparison of concrete materials considering methodological uncertainties - ScienceDirect	Materials	Building materials	Construction	1	0	1	1	0	Resources-, processing, and product- related	Circularity	Waste utilization	1	ENV+SAF
2022	Opn	Opn2022	1	Scientific article	Academia	Implementation of a multicriteria analytical framework for the sustainability evaluation and comparison of concrete materials considering methodological uncertainties - ScienceDirect	Materials	Building materials	Construction	1	0	1	1	0	Resources-, processing, and product- related	Circularity	Durability (years)	1	ENV+SAF
2022	Opn	Opn2022	1	Scientific article	Academia	Implementation of a multicriteria analytical framework for the sustainability evaluation and comparison of concrete materials considering methodological uncertainties - ScienceDirect	Materials	Building materials	Construction	1	0	1	1	0	Resources-, processing, and product- related	Circularity	Recycling efficiency/recovery rate (%)	1	ENV+SAF
2022	Opn	Opn2022	1	Scientific article	Academia	Implementation of a multicriteria analytical framework for the sustainability evaluation and comparison of concrete materials considering methodological uncertainties - ScienceDirect	Materials	Building materials	Construction	1	0	1	1	0	Resources-, processing, and product- related	Energy	Energy consumption (kWh or MJ)	1	ENV+SAF
2022	Scheneider et al	Scheneider et al2022	0	Scientific article	Academia	Multicriteria optimization as enabler for Sustainable Ceramic Matrix Composites - Schneider - 2022 - International Journal of Applied Ceramic Technology - Wiley Online Library	Materials	Composites	not specified	1	0	1	0	0	Environmental	Resources	Damage to Resources (Recipe)	1	ENV
2022	Scheneider et al	Scheneider et al2022	0	Scientific article	Academia	Multicriteria optimization as enabler for Sustainable Ceramic Matrix Composites - Schneider - 2022 - International Journal of Applied Ceramic Technology - Wiley Online Library	Materials	Composites	not specified	1	0	1	0	0	Environmental	Integrated Assessment	Ecosystem quality (recipe)	1	ENV
2022	Scheneider et al	Scheneider et al2022	0	Scientific article	Academia	Multicriteria optimization as enabler for Sustainable Ceramic Matrix Composites - Schneider - 2022 - International Journal of Applied Ceramic Technology - Wiley Online Library	Materials	Composites	not specified	1	0	1	0	0	Environmental	Integrated Assessment	Human health(recipe)	1	ENV
2022	van Dijk et al	van Dijk et al2022	1	Scientific article	Academia	https://www.sciencedirect.com/science/article/pii/S0045653522005434	Chemicals	Flame retardants		0	0	1	0	0	Environmental	Climate Change	GWP 100 (kg CO₂eq)	1	ENV+SAF
2022	van Dijk et al	van Dijk et al2022	1	Scientific article	Academia	https://www.sciencedirect.com/science/article/pii/S0045653522005434	Chemicals	Flame retardants		0	0	1	0	0	Resources-, processing, and product- related	Biodegradability	Biodegradablity (not specified)	1	ENV+SAF
2016	Global Sustainability Standards Board (GSSB) GRI 301: Materials	Global Sustainability Standards Board (GSSB) GRI 301: Materials2016	0	Standard	Industry	https://www.globalreporting.org/standards/media/1008/gri-301-materials-2016.pdf	Materials	not specified		0	0	0	0	0	Resources-, processing, and product- related	Resources: types, quantity, and efficiency considerations	Recycled input materials (%)	1	SAF
2016	Global Sustainability Standards Board (GSSB) GRI 301: Materials	Global Sustainability Standards Board (GSSB) GRI 301: Materials2016	0	Standard	Industry	https://www.globalreporting.org/standards/media/1008/gri-301-materials-2016.pdf	Materials	not specified		0	0	0	0	0	Resources-, processing, and product- related	Resources: types, quantity, and efficiency considerations	Non - Renewable resources amount	1	SAF
2016	Global Sustainability Standards Board (GSSB) GRI 301: Materials	Global Sustainability Standards Board (GSSB) GRI 301: Materials2016	0	Standard	Industry	https://www.globalreporting.org/standards/media/1008/gri-301-materials-2016.pdf	Materials	not specified		0	0	0	0	0	Resources-, processing, and product- related	Resources: types, quantity, and efficiency considerations	Renewable resources amount	1	SAF
2016	Global Sustainability Standards Board (GSSB) GRI 301: Materials	Global Sustainability Standards Board (GSSB) GRI 301: Materials2016	0	Standard	Industry	https://www.globalreporting.org/standards/media/1008/gri-301-materials-2016.pdf	Materials	not specified		0	0	0	0	0	Resources-, processing, and product- related	Circularity	Recycled content (%)	1	SAF
2016	Global Sustainability Standards Board (GSSB) GRI 301: Materials	Global Sustainability Standards Board (GSSB) GRI 301: Materials2016	0	Standard	Industry	https://www.globalreporting.org/standards/media/1008/gri-301-materials-2016.pdf	Materials	not specified		0	0	0	0	0	Resources-, processing, and product- related	Circularity	Percentage of reclaimed products and their packaging materials (%)	1	SAF
2022	Majgaonkar et al.	Majgaonkar et al.2022	1	Scientific article	Academia	http://dx.doi.org/10.1016/B978-0-323-95879-0.50139-9	Chemicals and materials	Solvents		1	0	0	0	0	Environmental	Climate Change	GWP 100 (kg CO₂eq)	1	ENV+ECO
2022	Majgaonkar et al.	Majgaonkar et al.2022	1	Scientific article	Academia	http://dx.doi.org/10.1016/B978-0-323-95879-0.50139-9	Chemicals and materials	Solvents		1	0	0	0	0	Environmental	Toxicity	Human toxicity (not specified)	1	ENV+ECO
2022	Majgaonkar et al.	Majgaonkar et al.2022	1	Scientific article	Academia	http://dx.doi.org/10.1016/B978-0-323-95879-0.50139-9	Chemicals and materials	Solvents		1	0	0	0	0	Environmental	Acidification	Acidification potential (molc H+ eq)	1	ENV+ECO
2022	Majgaonkar et al.	Majgaonkar et al.2022	1	Scientific article	Academia	http://dx.doi.org/10.1016/B978-0-323-95879-0.50139-9	Chemicals and materials	Solvents		1	0	0	0	0	Resources-, processing, and product- related	Energy	Cumulative energy demand (MJ)	1	ENV+ECO
2021	Zapata Boada et al	Zapata Boada et al2021	1	Scientific article	Academia	https://doi.org/10.1021/acs.iecr.1c02907	Chemicals	Solvents		1	0	1	1	0	Environmental	Climate Change	GWP 100 (kg CO₂eq)	1	ENV+SAF+ECO
2021	Zapata Boada et al	Zapata Boada et al2021	1	Scientific article	Academia	https://doi.org/10.1021/acs.iecr.1c02907	Chemicals	Solvents		1	0	1	1	0	Environmental	Toxicity	Marine ecotoxicity (g C6H4CI2-eq)	1	ENV+SAF+ECO
2021	Zapata Boada et al	Zapata Boada et al2021	1	Scientific article	Academia	https://doi.org/10.1021/acs.iecr.1c02907	Chemicals	Solvents		1	0	1	1	0	Environmental	Toxicity	Freshwater ecotoxicity (g C6H4CI2-eq)	1	ENV+SAF+ECO
2021	Zapata Boada et al	Zapata Boada et al2021	1	Scientific article	Academia	https://doi.org/10.1021/acs.iecr.1c02907	Chemicals	Solvents		1	0	1	1	0	Environmental	Toxicity	Terrestrial ecotoxicity (g C6H4CI2-eq)	1	ENV+SAF+ECO
2021	Zapata Boada et al	Zapata Boada et al2021	1	Scientific article	Academia	https://doi.org/10.1021/acs.iecr.1c02907	Chemicals	Solvents		1	0	1	1	0	Environmental	Toxicity	Human toxicity – no cancer potential (CTUh)	1	ENV+SAF+ECO
2021	Zapata Boada et al	Zapata Boada et al2021	1	Scientific article	Academia	https://doi.org/10.1021/acs.iecr.1c02907	Chemicals	Solvents		1	0	1	1	0	Environmental	Toxicity	Human toxicity – cancer potential (CTUh)	1	ENV+SAF+ECO
2021	Zapata Boada et al	Zapata Boada et al2021	1	Scientific article	Academia	https://doi.org/10.1021/acs.iecr.1c02907	Chemicals	Solvents		1	0	1	1	0	Environmental	Ionizing radiation	Ionizing radiation (kBq U235 eq)	1	ENV+SAF+ECO
2021	Zapata Boada et al	Zapata Boada et al2021	1	Scientific article	Academia	https://doi.org/10.1021/acs.iecr.1c02907	Chemicals	Solvents		1	0	1	1	0	Environmental	Acidification	Terrestrial acidification (kg SO2eq)	1	ENV+SAF+ECO
2021	Zapata Boada et al	Zapata Boada et al2021	1	Scientific article	Academia	https://doi.org/10.1021/acs.iecr.1c02907	Chemicals	Solvents		1	0	1	1	0	Environmental	Eutrophication	Marine eutrophication potential (mol N eq)	1	ENV+SAF+ECO
2021	Zapata Boada et al	Zapata Boada et al2021	1	Scientific article	Academia	https://doi.org/10.1021/acs.iecr.1c02907	Chemicals	Solvents		1	0	1	1	0	Environmental	Eutrophication	Freshwater eutrophication potential (kg P eq)	1	ENV+SAF+ECO
2021	Zapata Boada et al	Zapata Boada et al2021	1	Scientific article	Academia	https://doi.org/10.1021/acs.iecr.1c02907	Chemicals	Solvents		1	0	1	1	0	Environmental	Stratospheric ozone Depletion	Ozone depletion potential (kg CFC-11)	1	ENV+SAF+ECO
2021	Zapata Boada et al	Zapata Boada et al2021	1	Scientific article	Academia	https://doi.org/10.1021/acs.iecr.1c02907	Chemicals	Solvents		1	0	1	1	0	Environmental	Particulate Matter	Particulate matter (PM 2.5eq)	1	ENV+SAF+ECO
2021	Zapata Boada et al	Zapata Boada et al2021	1	Scientific article	Academia	https://doi.org/10.1021/acs.iecr.1c02907	Chemicals	Solvents		1	0	1	1	0	Environmental	Photochemical Ozone Formation	photochemical oxidant formation, human health	1	ENV+SAF+ECO
2021	Zapata Boada et al	Zapata Boada et al2021	1	Scientific article	Academia	https://doi.org/10.1021/acs.iecr.1c02907	Chemicals	Solvents		1	0	1	1	0	Environmental	Photochemical Ozone Formation	photochemical oxidant formation, ecosystems	1	ENV+SAF+ECO
2021	Zapata Boada et al	Zapata Boada et al2021	1	Scientific article	Academia	https://doi.org/10.1021/acs.iecr.1c02907	Chemicals	Solvents		1	0	1	1	0	Environmental	Resources	Water consumption potential (m3eq)	1	ENV+SAF+ECO
2021	Zapata Boada et al	Zapata Boada et al2021	1	Scientific article	Academia	https://doi.org/10.1021/acs.iecr.1c02907	Chemicals	Solvents		1	0	1	1	0	Environmental	Resources	Land use (kg C deficit)	1	ENV+SAF+ECO
2021	Zapata Boada et al	Zapata Boada et al2021	1	Scientific article	Academia	https://doi.org/10.1021/acs.iecr.1c02907	Chemicals	Solvents		1	0	1	1	0	Resources-, processing, and product- related	Energy	Primary Energy Demand	1	ENV+SAF+ECO
2021	Zapata Boada et al	Zapata Boada et al2021	1	Scientific article	Academia	https://doi.org/10.1021/acs.iecr.1c02907	Chemicals	Solvents		1	0	1	1	0	Economic	Profitability	Total Capital Investment	1	ENV+SAF+ECO
2021	Zapata Boada et al	Zapata Boada et al2021	1	Scientific article	Academia	https://doi.org/10.1021/acs.iecr.1c02907	Chemicals	Solvents		1	0	1	1	0	Economic	Profitability	Minimum selling price	1	ENV+SAF+ECO
2021	Zapata Boada et al	Zapata Boada et al2021	1	Scientific article	Academia	https://doi.org/10.1021/acs.iecr.1c02907	Chemicals	Solvents		1	0	1	1	0	Economic	Profitability	Net present value (€)	1	ENV+SAF+ECO
2021	Zapata Boada et al	Zapata Boada et al2021	1	Scientific article	Academia	https://doi.org/10.1021/acs.iecr.1c02907	Chemicals	Solvents		1	0	1	1	0	Economic	Other	discounted cash flow rate of return	1	ENV+SAF+ECO
2021	Zapata Boada et al	Zapata Boada et al2021	1	Scientific article	Academia	https://doi.org/10.1021/acs.iecr.1c02907	Chemicals	Solvents		1	0	1	1	0	Economic	Internal cost	(Total) production cost (€)	1	ENV+SAF+ECO
2022	Zapata Boada et al	Zapata Boada et al2022	0	Scientific article	Academia	http://dx.doi.org/10.1016/B978-0-323-85159-6.50173-1	Chemicals	Solvents		0	0	0	0	0	Environmental	Climate Change	GWP 100 (kg CO₂eq)	1	ENV+SAF+ECO
2022	Zapata Boada et al	Zapata Boada et al2022	0	Scientific article	Academia	http://dx.doi.org/10.1016/B978-0-323-85159-6.50173-1	Chemicals	Solvents		0	0	0	0	0	Resources-, processing, and product- related	Energy	Energy intensity	1	ENV+SAF+ECO
2022	Zapata Boada et al	Zapata Boada et al2022	0	Scientific article	Academia	http://dx.doi.org/10.1016/B978-0-323-85159-6.50173-1	Chemicals	Solvents		0	0	0	0	0	Economic	Internal cost	Total Annual Cost (TAC)	1	ENV+SAF+ECO
2022	Tinoco Saenz	Tinoco Saenz2022	1	Scientific article	Academia	https://doi.org/10.1016/j.jlp.2022.104899	Chemicals	Precursor		1	0	1	0	1	Environmental	Integrated Assessment	Eco-indicator 99 total [-]	1	ENV+ECO
2022	Tinoco Saenz	Tinoco Saenz2022	1	Scientific article	Academia	https://doi.org/10.1016/j.jlp.2022.104899	Chemicals	Precursor		1	0	1	0	1	Economic	Internal cost	Total Annual Cost (TAC)	1	ENV+ECO
2022	Masrura et al.	Masrura et al.2022	1	Scientific article	Academia	10.1016/j.envres.2022.114962	Chemicals	Solvents		0	0	1	0	0	Environmental	Photochemical Ozone Formation	Photochemical oxidation potential (PCO)	1	ENV+SAF+ECO
2022	Masrura et al.	Masrura et al.2022	1	Scientific article	Academia	10.1016/j.envres.2022.114962	Chemicals	Solvents		0	0	1	0	0	Environmental	Integrated Assessment	Oral toxicity (-logLD50)	1	ENV+SAF+ECO
2022	Masrura et al.	Masrura et al.2022	1	Scientific article	Academia	10.1016/j.envres.2022.114962	Chemicals	Solvents		0	0	1	0	0	Resources-, processing, and product- related	Biodegradability	Octanot-water distribution coeffieicnt (KOC)	1	ENV+SAF+ECO
2022	Masrura et al.	Masrura et al.2022	1	Scientific article	Academia	10.1016/j.envres.2022.114962	Chemicals	Solvents		0	0	1	0	0	Resources-, processing, and product- related	Energy	Energy consumption (kWh or MJ)	1	ENV+SAF+ECO
2022	Masrura et al.	Masrura et al.2022	1	Scientific article	Academia	10.1016/j.envres.2022.114962	Chemicals	Solvents		0	0	1	0	0	Economic	Other	Point of explosion	1	ENV+SAF+ECO
2022	Masrura et al.	Masrura et al.2022	1	Scientific article	Academia	10.1016/j.envres.2022.114962	Chemicals	Solvents		0	0	1	0	0	Economic	Other	Flash point	1	ENV+SAF+ECO
2022	Masrura et al.	Masrura et al.2022	1	Scientific article	Academia	10.1016/j.envres.2022.114962	Chemicals	Solvents		0	0	1	0	0	Economic	Other	TCC (Total Capital Cost)	1 (they call it ACC Capital cost)	ENV+SAF+ECO
2022	Masrura et al.	Masrura et al.2022	1	Scientific article	Academia	10.1016/j.envres.2022.114962	Chemicals	Solvents		0	0	1	0	0	Economic	Other	TPC (Total Production Cost)	1 (they call it OPEX - oprating expenses)	ENV+SAF+ECO
2022	Masrura et al.	Masrura et al.2022	1	Scientific article	Academia	10.1016/j.envres.2022.114962	Chemicals	Solvents		0	0	1	0	0	Economic	Internal cost	Total Annual Cost (TAC)	1	ENV+SAF+ECO
2022	Xiang et al.	Xiang et al.2022	1	Scientific article	Academia	10.1016/j.fuel.2022.126651	Chemicals	Solvents		0	0	0	0	1	Environmental	Photochemical Ozone Formation	Photochemical oxidation potential (PCO)	1	ENV+SAF+ECO
2022	Xiang et al.	Xiang et al.2022	1	Scientific article	Academia	10.1016/j.fuel.2022.126651	Chemicals	Solvents		0	0	0	0	1	Resources-, processing, and product- related	Biodegradability	Octanot-water distribution coeffieicnt (KOC)	1	ENV+SAF+ECO
2022	Xiang et al.	Xiang et al.2022	1	Scientific article	Academia	10.1016/j.fuel.2022.126651	Chemicals	Solvents		0	0	0	0	1	Environmental	Toxicity	Bioconcentration factor	1	ENV+SAF+ECO
2023	García-Velásquez C.	García-Velásquez C.2023	1	Scientific article	Academia	10.1016/j.spc.2022.10.015	Materials	Plastics	not specified	1	0	1	0	0	Environmental	Climate Change	GWP 100 (kg CO₂eq)	1	ENV
2023	García-Velásquez C.	García-Velásquez C.2023	1	Scientific article	Academia	10.1016/j.spc.2022.10.015	Materials	Plastics	not specified	1	0	1	0	0	Environmental	Toxicity	Human toxicity potential (kg 1,4 DCB eq or CTUh)	1	ENV
2023	García-Velásquez C.	García-Velásquez C.2023	1	Scientific article	Academia	10.1016/j.spc.2022.10.015	Materials	Plastics	not specified	1	0	1	0	0	Environmental	Acidification	Terrestrial acidification (kg SO2eq)	1	ENV
2023	García-Velásquez C.	García-Velásquez C.2023	1	Scientific article	Academia	10.1016/j.spc.2022.10.015	Materials	Plastics	not specified	1	0	1	0	0	Environmental	Eutrophication	Marine eutrophication potential (mol N eq)	1	ENV
2023	García-Velásquez C.	García-Velásquez C.2023	1	Scientific article	Academia	10.1016/j.spc.2022.10.015	Materials	Plastics	not specified	1	0	1	0	0	Environmental	Eutrophication	Freshwater eutrophication potential (kg P eq)	1	ENV
2023	García-Velásquez C.	García-Velásquez C.2023	1	Scientific article	Academia	10.1016/j.spc.2022.10.015	Materials	Plastics	not specified	1	0	1	0	0	Environmental	Particulate Matter	Particulate matter (PM 2.5eq)	1	ENV
2023	García-Velásquez C.	García-Velásquez C.2023	1	Scientific article	Academia	10.1016/j.spc.2022.10.015	Materials	Plastics	not specified	1	0	1	0	0	Environmental	Resources	Water depletion potential (m3eq)	1	ENV
2023	García-Velásquez C.	García-Velásquez C.2023	1	Scientific article	Academia	10.1016/j.spc.2022.10.015	Materials	Plastics	not specified	1	0	1	0	0	Environmental	Resources	Land occupation (m2a crop eq)	1	ENV
2023	García-Velásquez C.	García-Velásquez C.2023	1	Scientific article	Academia	10.1016/j.spc.2022.10.015	Materials	Plastics	not specified	1	0	1	0	0	Environmental	Resources	Resource use/depletion - fossil (MJ)	1	ENV
2023	Soeteman-Hernández et al.	Soeteman-Hernández et al.2023	0	Scientific article	Academia	10.1016/j.isci.2023.106060	Products	not applicable	Batteries	0	1	0	0	1	Environmental	Integrated Assessment	embodied biodiversity footprints	1	ENV+SAF+SOC
2023	Soeteman-Hernández et al.	Soeteman-Hernández et al.2023	0	Scientific article	Academia	10.1016/j.isci.2023.106060	Products	not applicable	Batteries	0	1	0	0	1	Environmental	Integrated Assessment	DALY due to air and water pollution	1	ENV+SAF+SOC
2023	Soeteman-Hernández et al.	Soeteman-Hernández et al.2023	0	Scientific article	Academia	10.1016/j.isci.2023.106060	Products	not applicable	Batteries	0	1	0	0	1	Resources-, processing, and product- related	Resources: types, quantity, and efficiency considerations	Use of critical raw materials? (yes/no)	1	ENV+SAF+SOC
2023	Soeteman-Hernández et al.	Soeteman-Hernández et al.2023	0	Scientific article	Academia	10.1016/j.isci.2023.106060	Products	not applicable	Batteries	0	1	0	0	1	Resources-, processing, and product- related	Resources: types, quantity, and efficiency considerations	Biomass consumption	1	ENV+SAF+SOC
2023	Soeteman-Hernández et al.	Soeteman-Hernández et al.2023	0	Scientific article	Academia	10.1016/j.isci.2023.106060	Products	not applicable	Batteries	0	1	0	0	1	Resources-, processing, and product- related	Resources: types, quantity, and efficiency considerations	Fossil fuel consumption	1	ENV+SAF+SOC
2023	Soeteman-Hernández et al.	Soeteman-Hernández et al.2023	0	Scientific article	Academia	10.1016/j.isci.2023.106060	Products	not applicable	Batteries	0	1	0	0	1	Environmental	Resources	water footprints	1	ENV+SAF+SOC
2023	Soeteman-Hernández et al.	Soeteman-Hernández et al.2023	0	Scientific article	Academia	10.1016/j.isci.2023.106060	Products	not applicable	Batteries	0	1	0	0	1	Social	workers	Child labour	1	ENV+SAF+SOC
2023	Soeteman-Hernández et al.	Soeteman-Hernández et al.2023	0	Scientific article	Academia	10.1016/j.isci.2023.106060	Products	not applicable	Batteries	0	1	0	0	1	Social	workers	Forced labour	1	ENV+SAF+SOC
2023	Soeteman-Hernández et al.	Soeteman-Hernández et al.2023	0	Scientific article	Academia	10.1016/j.isci.2023.106060	Products	not applicable	Batteries	0	1	0	0	1	Social	workers	Fair salary	1	ENV+SAF+SOC
2023	Soeteman-Hernández et al.	Soeteman-Hernández et al.2023	0	Scientific article	Academia	10.1016/j.isci.2023.106060	Products	not applicable	Batteries	0	1	0	0	1	Social	society	Active involvement of enterprises in corruption and bribery	1	ENV+SAF+SOC
2023	Soeteman-Hernández et al.	Soeteman-Hernández et al.2023	0	Scientific article	Academia	10.1016/j.isci.2023.106060	Products	not applicable	Batteries	0	1	0	0	1	Social	local community	Unemployment rate	1	ENV+SAF+SOC
2023	Soeteman-Hernández et al.	Soeteman-Hernández et al.2023	0	Scientific article	Academia	10.1016/j.isci.2023.106060	Products	not applicable	Batteries	0	1	0	0	1	Social	workers	Gender wage gap	1	ENV+SAF+SOC
2023	Soeteman-Hernández et al.	Soeteman-Hernández et al.2023	0	Scientific article	Academia	10.1016/j.isci.2023.106060	Products	not applicable	Batteries	0	1	0	0	1	Social	value chain actors	Fair competition	1	ENV+SAF+SOC
2023	Soeteman-Hernández et al.	Soeteman-Hernández et al.2023	0	Scientific article	Academia	10.1016/j.isci.2023.106060	Products	not applicable	Batteries	0	1	0	0	1	Social	workers	Evidence of violations of laws and employment regulations	1	ENV+SAF+SOC
2023	Soeteman-Hernández et al.	Soeteman-Hernández et al.2023	0	Scientific article	Academia	10.1016/j.isci.2023.106060	Products	not applicable	Batteries	0	1	0	0	1	Social	workers	association and bargaining rights	1	ENV+SAF+SOC
2023	Soeteman-Hernández et al.	Soeteman-Hernández et al.2023	0	Scientific article	Academia	10.1016/j.isci.2023.106060	Products	not applicable	Batteries	0	1	0	0	1	Social	workers	weekly hours of work per employee	1	ENV+SAF+SOC
2023	Soeteman-Hernández et al.	Soeteman-Hernández et al.2023	0	Scientific article	Academia	10.1016/j.isci.2023.106060	Products	not applicable	Batteries	0	1	0	0	1	Social	local community	International migrant workers in the sector	1	ENV+SAF+SOC
2023	Soeteman-Hernández et al.	Soeteman-Hernández et al.2023	0	Scientific article	Academia	10.1016/j.isci.2023.106060	Products	not applicable	Batteries	0	1	0	0	1	Social	workers	women in the sectoral labour force	1	ENV+SAF+SOC
2023	Soeteman-Hernández et al.	Soeteman-Hernández et al.2023	0	Scientific article	Academia	10.1016/j.isci.2023.106060	Products	not applicable	Batteries	0	1	0	0	1	Social	workers	men in the sectoral labour force	1	ENV+SAF+SOC
2023	Soeteman-Hernández et al.	Soeteman-Hernández et al.2023	0	Scientific article	Academia	10.1016/j.isci.2023.106060	Products	not applicable	Batteries	0	1	0	0	1	Social	local community	embodied forest area footprints	1	ENV+SAF+SOC
2023	Soeteman-Hernández et al.	Soeteman-Hernández et al.2023	0	Scientific article	Academia	10.1016/j.isci.2023.106060	Products	not applicable	Batteries	0	1	0	0	1	Social	local community	emodied agricultural area footprints	1	ENV+SAF+SOC
2023	Soeteman-Hernández et al.	Soeteman-Hernández et al.2023	0	Scientific article	Academia	10.1016/j.isci.2023.106060	Products	not applicable	Batteries	0	1	0	0	1	Social	society	Public sector corruption	1	ENV+SAF+SOC
2023	Soeteman-Hernández et al.	Soeteman-Hernández et al.2023	0	Scientific article	Academia	10.1016/j.isci.2023.106060	Products	not applicable	Batteries	0	1	0	0	1	Social	workers	trade unionism	1	ENV+SAF+SOC
2023	Soeteman-Hernández et al.	Soeteman-Hernández et al.2023	0	Scientific article	Academia	10.1016/j.isci.2023.106060	Products	not applicable	Batteries	0	1	0	0	1	Social	workers	Social security, expenditure	1	ENV+SAF+SOC
2023	Soeteman-Hernández et al.	Soeteman-Hernández et al.2023	0	Scientific article	Academia	10.1016/j.isci.2023.106060	Products	not applicable	Batteries	0	1	0	0	1	Social	local community	certified environmental management system	1	ENV+SAF+SOC
2023	Soeteman-Hernández et al.	Soeteman-Hernández et al.2023	0	Scientific article	Academia	10.1016/j.isci.2023.106060	Products	not applicable	Batteries	0	1	0	0	1	Social	value chain actors	promoting social responsibility	1	ENV+SAF+SOC
2023	Soeteman-Hernández et al.	Soeteman-Hernández et al.2023	0	Scientific article	Academia	10.1016/j.isci.2023.106060	Products	not applicable	Batteries	0	1	0	0	1	Social	society	health expenditure	1	ENV+SAF+SOC
2023	Soeteman-Hernández et al.	Soeteman-Hernández et al.2023	0	Scientific article	Academia	10.1016/j.isci.2023.106060	Products	not applicable	Batteries	0	1	0	0	1	Social	local community	Pollution level of the country	1	ENV+SAF+SOC
2023	Soeteman-Hernández et al.	Soeteman-Hernández et al.2023	0	Scientific article	Academia	10.1016/j.isci.2023.106060	Products	not applicable	Batteries	0	1	0	0	1	Social	local community	Extraction of material resources	1	ENV+SAF+SOC
2023	Soeteman-Hernández et al.	Soeteman-Hernández et al.2023	0	Scientific article	Academia	10.1016/j.isci.2023.106060	Products	not applicable	Batteries	0	1	0	0	1	Social	local community	sanitation coverage	1	ENV+SAF+SOC
2023	Soeteman-Hernández et al.	Soeteman-Hernández et al.2023	0	Scientific article	Academia	10.1016/j.isci.2023.106060	Products	not applicable	Batteries	0	1	0	0	1	Social	workers	trafficking in person	1	ENV+SAF+SOC
2023	Soeteman-Hernández et al.	Soeteman-Hernández et al.2023	0	Scientific article	Academia	10.1016/j.isci.2023.106060	Products	not applicable	Batteries	0	1	0	0	1	Social	local community	drinking water coverage	1	ENV+SAF+SOC
2023	Soeteman-Hernández et al.	Soeteman-Hernández et al.2023	0	Scientific article	Academia	10.1016/j.isci.2023.106060	Products	not applicable	Batteries	0	1	0	0	1	Social	society	Illiteracy rate	1	ENV+SAF+SOC
2023	Soeteman-Hernández et al.	Soeteman-Hernández et al.2023	0	Scientific article	Academia	10.1016/j.isci.2023.106060	Products	not applicable	Batteries	0	1	0	0	1	Social	society	value added	1	ENV+SAF+SOC
2023	Soeteman-Hernández et al.	Soeteman-Hernández et al.2023	0	Scientific article	Academia	10.1016/j.isci.2023.106060	Products	not applicable	Batteries	0	1	0	0	1	Social	local community	Level of industrial water use	1	ENV+SAF+SOC
2023	Soeteman-Hernández et al.	Soeteman-Hernández et al.2023	0	Scientific article	Academia	10.1016/j.isci.2023.106060	Products	not applicable	Batteries	0	1	0	0	1	Social	local community	Respect of indigenous rights	1	ENV+SAF+SOC
2023	Soeteman-Hernández et al.	Soeteman-Hernández et al.2023	0	Scientific article	Academia	10.1016/j.isci.2023.106060	Products	not applicable	Batteries	0	1	0	0	1	Social	local community	international migrant stock	1	ENV+SAF+SOC
2023	Soeteman-Hernández et al.	Soeteman-Hernández et al.2023	0	Scientific article	Academia	10.1016/j.isci.2023.106060	Products	not applicable	Batteries	0	1	0	0	1	Social	society	Life expectancy at birth	1	ENV+SAF+SOC
2023	Soeteman-Hernández et al.	Soeteman-Hernández et al.2023	0	Scientific article	Academia	10.1016/j.isci.2023.106060	Products	not applicable	Batteries	0	1	0	0	1	Social	society	Public expenditure on education	1	ENV+SAF+SOC
2023	Soeteman-Hernández et al.	Soeteman-Hernández et al.2023	0	Scientific article	Academia	10.1016/j.isci.2023.106060	Products	not applicable	Batteries	0	1	0	0	1	Social	society	risk of conflicts	1	ENV+SAF+SOC
2023	Soeteman-Hernández et al.	Soeteman-Hernández et al.2023	0	Scientific article	Academia	10.1016/j.isci.2023.106060	Products	not applicable	Batteries	0	1	0	0	1	Social	local community	Net migration rate	1	ENV+SAF+SOC
2023	Soeteman-Hernández et al.	Soeteman-Hernández et al.2023	0	Scientific article	Academia	10.1016/j.isci.2023.106060	Products	not applicable	Batteries	0	1	0	0	1	Social	society	contribution to economic development	1	ENV+SAF+SOC
2023	Soeteman-Hernández et al.	Soeteman-Hernández et al.2023	0	Scientific article	Academia	10.1016/j.isci.2023.106060	Products	not applicable	Batteries	0	1	0	0	1	Social	workers	Presence of sufficient safety measures	1	ENV+SAF+SOC
2023	Soeteman-Hernández et al.	Soeteman-Hernández et al.2023	0	Scientific article	Academia	10.1016/j.isci.2023.106060	Products	not applicable	Batteries	0	1	0	0	1	Social	workers	workers affected by natural disasters	1	ENV+SAF+SOC
2023	Soeteman-Hernández et al.	Soeteman-Hernández et al.2023	0	Scientific article	Academia	10.1016/j.isci.2023.106060	Products	not applicable	Batteries	0	1	0	0	1	Social	society	youth illiteracy	1	ENV+SAF+SOC
2023	Soeteman-Hernández et al.	Soeteman-Hernández et al.2023	0	Scientific article	Academia	10.1016/j.isci.2023.106060	Products	not applicable	Batteries	0	1	0	0	1	Social	workers	Accident rates at workplace	1	ENV+SAF+SOC
2023	Pizzol et al.	Pizzol et al.2023	1	Scientific article	Academia	https://doi.org/10.1016/j.cesys.2023.100132	Materials	Nanomaterials	Packaging	0	1	1	1	1	Environmental	Climate Change	GWP 100 (kg CO₂eq)	1	ENV+SAF+SOC+ECO
2023	Pizzol et al.	Pizzol et al.2023	1	Scientific article	Academia	https://doi.org/10.1016/j.cesys.2023.100133	Materials	Nanomaterials	Packaging	0	1	1	1	1	Environmental	Air emission	Air emissions	1	ENV+SAF+SOC+ECO
2023	Pizzol et al.	Pizzol et al.2023	1	Scientific article	Academia	https://doi.org/10.1016/j.cesys.2023.100134	Materials	Nanomaterials	Packaging	0	1	1	1	1	Environmental	Water emission	Water emissions	1	ENV+SAF+SOC+ECO
2023	Pizzol et al.	Pizzol et al.2023	1	Scientific article	Academia	https://doi.org/10.1016/j.cesys.2023.100135	Materials	Nanomaterials	Packaging	0	1	1	1	1	Resources-, processing, and product- related	Resources: types, quantity, and efficiency considerations	Renewability of resources	1	ENV+SAF+SOC+ECO
2023	Pizzol et al.	Pizzol et al.2023	1	Scientific article	Academia	https://doi.org/10.1016/j.cesys.2023.100136	Materials	Nanomaterials	Packaging	0	1	1	1	1	Resources-, processing, and product- related	Resources: types, quantity, and efficiency considerations	Use of critical raw materials? (yes/no)	1	ENV+SAF+SOC+ECO
2023	Pizzol et al.	Pizzol et al.2023	1	Scientific article	Academia	https://doi.org/10.1016/j.cesys.2023.100137	Materials	Nanomaterials	Packaging	0	1	1	1	1	Resources-, processing, and product- related	Resources: types, quantity, and efficiency considerations	Hazard Waste	1	ENV+SAF+SOC+ECO
2023	Pizzol et al.	Pizzol et al.2023	1	Scientific article	Academia	https://doi.org/10.1016/j.cesys.2023.100138	Materials	Nanomaterials	Packaging	0	1	1	1	1	Resources-, processing, and product- related	Resources: types, quantity, and efficiency considerations	Non hazard waste	1	ENV+SAF+SOC+ECO
2023	Pizzol et al.	Pizzol et al.2023	1	Scientific article	Academia	https://doi.org/10.1016/j.cesys.2023.100139	Materials	Nanomaterials	Packaging	0	1	1	1	1	Resources-, processing, and product- related	Resources: types, quantity, and efficiency considerations	Water consumption (m3)	1	ENV+SAF+SOC+ECO
2023	Pizzol et al.	Pizzol et al.2023	1	Scientific article	Academia	https://doi.org/10.1016/j.cesys.2023.100140	Materials	Nanomaterials	Packaging	0	1	1	1	1	Resources-, processing, and product- related	Resources: types, quantity, and efficiency considerations	Resources Consumption	1	ENV+SAF+SOC+ECO
2023	Pizzol et al.	Pizzol et al.2023	1	Scientific article	Academia	https://doi.org/10.1016/j.cesys.2023.100141	Materials	Nanomaterials	Packaging	0	1	1	1	1	Resources-, processing, and product- related	Resources: types, quantity, and efficiency considerations	Solid waste generation	1	ENV+SAF+SOC+ECO
2023	Pizzol et al.	Pizzol et al.2023	1	Scientific article	Academia	https://doi.org/10.1016/j.cesys.2023.100142	Materials	Nanomaterials	Packaging	0	1	1	1	1	Resources-, processing, and product- related	Resources: types, quantity, and efficiency considerations	Resources efficiency	1	ENV+SAF+SOC+ECO
2023	Pizzol et al.	Pizzol et al.2023	1	Scientific article	Academia	https://doi.org/10.1016/j.cesys.2023.100143	Materials	Nanomaterials	Packaging	0	1	1	1	1	Resources-, processing, and product- related	Resources: types, quantity, and efficiency considerations	Resources valorization	1	ENV+SAF+SOC+ECO
2023	Pizzol et al.	Pizzol et al.2023	1	Scientific article	Academia	https://doi.org/10.1016/j.cesys.2023.100144	Materials	Nanomaterials	Packaging	0	1	1	1	1	Economic	Other	Waste management cost	1	ENV+SAF+SOC+ECO
2023	Pizzol et al.	Pizzol et al.2023	1	Scientific article	Academia	https://doi.org/10.1016/j.cesys.2023.100145	Materials	Nanomaterials	Packaging	0	1	1	1	1	Resources-, processing, and product- related	Circularity	Waste utilization	1	ENV+SAF+SOC+ECO
2023	Pizzol et al.	Pizzol et al.2023	1	Scientific article	Academia	https://doi.org/10.1016/j.cesys.2023.100146	Materials	Nanomaterials	Packaging	0	1	1	1	1	Resources-, processing, and product- related	Circularity	Reuse rate/reusability	1	ENV+SAF+SOC+ECO
2023	Pizzol et al.	Pizzol et al.2023	1	Scientific article	Academia	https://doi.org/10.1016/j.cesys.2023.100147	Materials	Nanomaterials	Packaging	0	1	1	1	1	Resources-, processing, and product- related	Circularity	Durability (years)	1	ENV+SAF+SOC+ECO
2023	Pizzol et al.	Pizzol et al.2023	1	Scientific article	Academia	https://doi.org/10.1016/j.cesys.2023.100148	Materials	Nanomaterials	Packaging	0	1	1	1	1	Resources-, processing, and product- related	Energy	Energy consumption (kWh or MJ)	1	ENV+SAF+SOC+ECO
2023	Pizzol et al.	Pizzol et al.2023	1	Scientific article	Academia	https://doi.org/10.1016/j.cesys.2023.100149	Materials	Nanomaterials	Packaging	0	1	1	1	1	Social	local community	Respect of the living condition	1	ENV+SAF+SOC+ECO
2023	Pizzol et al.	Pizzol et al.2023	1	Scientific article	Academia	https://doi.org/10.1016/j.cesys.2023.100150	Materials	Nanomaterials	Packaging	0	1	1	1	1	Social	local community	Local employment	1	ENV+SAF+SOC+ECO
2023	Pizzol et al.	Pizzol et al.2023	1	Scientific article	Academia	https://doi.org/10.1016/j.cesys.2023.100151	Materials	Nanomaterials	Packaging	0	1	1	1	1	Social	value chain actors	Supply chain responsibility score	1	ENV+SAF+SOC+ECO
2023	Pizzol et al.	Pizzol et al.2023	1	Scientific article	Academia	https://doi.org/10.1016/j.cesys.2023.100152	Materials	Nanomaterials	Packaging	0	1	1	1	1	Social	value chain actors	Tracking capacity	1	ENV+SAF+SOC+ECO
2023	Pizzol et al.	Pizzol et al.2023	1	Scientific article	Academia	https://doi.org/10.1016/j.cesys.2023.100153	Materials	Nanomaterials	Packaging	0	1	1	1	1	Social	value chain actors	Regional materials	1	ENV+SAF+SOC+ECO
2023	Pizzol et al.	Pizzol et al.2023	1	Scientific article	Academia	https://doi.org/10.1016/j.cesys.2023.100154	Materials	Nanomaterials	Packaging	0	1	1	1	1	Economic	Other	Waste management cost	1	ENV+SAF+SOC+ECO
2023	Pizzol et al.	Pizzol et al.2023	1	Scientific article	Academia	https://doi.org/10.1016/j.cesys.2023.100155	Materials	Nanomaterials	Packaging	0	1	1	1	1	Economic	Internal cost	(Total) production cost (€)	1	ENV+SAF+SOC+ECO
2023	Pizzol et al.	Pizzol et al.2023	1	Scientific article	Academia	https://doi.org/10.1016/j.cesys.2023.100156	Materials	Nanomaterials	Packaging	0	1	1	1	1	Economic	Other	feedstock price	1	ENV+SAF+SOC+ECO
2023	Pizzol et al.	Pizzol et al.2023	1	Scientific article	Academia	https://doi.org/10.1016/j.cesys.2023.100157	Materials	Nanomaterials	Packaging	0	1	1	1	1	Economic	Other	Process cost	1	ENV+SAF+SOC+ECO
2023	Pizzol et al.	Pizzol et al.2023	1	Scientific article	Academia	https://doi.org/10.1016/j.cesys.2023.100158	Materials	Nanomaterials	Packaging	0	1	1	1	1	Economic	Internal cost	SSbd implementation costs	1	ENV+SAF+SOC+ECO
2022	OECD	OECD2022	1	Guidance	International organisation	https://one.oecd.org/document/ENV/CBC/MONO(2022)30/en/pdf	Materials	Nanomaterials	not specified	0	1	0	0	1	Environmental	Air emission	Air emissions	1	ENV+SAF+SOC
2022	OECD	OECD2022	1	Guidance	International organisation	https://one.oecd.org/document/ENV/CBC/MONO(2022)30/en/pdf	Materials	Nanomaterials	not specified	0	1	0	0	1	Environmental	Water emission	Water emissions	1	ENV+SAF+SOC
2022	OECD	OECD2022	1	Guidance	International organisation	https://one.oecd.org/document/ENV/CBC/MONO(2022)30/en/pdf	Materials	Nanomaterials	not specified	0	1	0	0	1	Environmental	Soil emission	soil emissions	1	ENV+SAF+SOC
2022	OECD	OECD2022	1	Guidance	International organisation	https://one.oecd.org/document/ENV/CBC/MONO(2022)30/en/pdf	Materials	Nanomaterials	not specified	0	1	0	0	1	Resources-, processing, and product- related	Resources: types, quantity, and efficiency considerations	Renewability of resources	1	ENV+SAF+SOC
2022	OECD	OECD2022	1	Guidance	International organisation	https://one.oecd.org/document/ENV/CBC/MONO(2022)30/en/pdf	Materials	Nanomaterials	not specified	0	1	0	0	1	Resources-, processing, and product- related	Resources: types, quantity, and efficiency considerations	Water consumption (m3)	1	ENV+SAF+SOC
2022	OECD	OECD2022	1	Guidance	International organisation	https://one.oecd.org/document/ENV/CBC/MONO(2022)30/en/pdf	Materials	Nanomaterials	not specified	0	1	0	0	1	Resources-, processing, and product- related	Resources: types, quantity, and efficiency considerations	Resources Consumption	1	ENV+SAF+SOC
2022	OECD	OECD2022	1	Guidance	International organisation	https://one.oecd.org/document/ENV/CBC/MONO(2022)30/en/pdf	Materials	Nanomaterials	not specified	0	1	0	0	1	Resources-, processing, and product- related	Resources: types, quantity, and efficiency considerations	Non - Renewable resources amount	1	ENV+SAF+SOC
2022	OECD	OECD2022	1	Guidance	International organisation	https://one.oecd.org/document/ENV/CBC/MONO(2022)30/en/pdf	Materials	Nanomaterials	not specified	0	1	0	0	1	Resources-, processing, and product- related	Resources: types, quantity, and efficiency considerations	Renewable resources amount	1	ENV+SAF+SOC
2022	OECD	OECD2022	1	Guidance	International organisation	https://one.oecd.org/document/ENV/CBC/MONO(2022)30/en/pdf	Materials	Nanomaterials	not specified	0	1	0	0	1	Economic	Other	Waste management cost	1	ENV+SAF+SOC
2022	OECD	OECD2022	1	Guidance	International organisation	https://one.oecd.org/document/ENV/CBC/MONO(2022)30/en/pdf	Materials	Nanomaterials	not specified	0	1	0	0	1	Resources-, processing, and product- related	Circularity	Recyclability/circularity (conceptual)	1	ENV+SAF+SOC
2022	OECD	OECD2022	1	Guidance	International organisation	https://one.oecd.org/document/ENV/CBC/MONO(2022)30/en/pdf	Materials	Nanomaterials	not specified	0	1	0	0	1	Resources-, processing, and product- related	Circularity	Recyclabile? (yes/no)	1	ENV+SAF+SOC
2022	OECD	OECD2022	1	Guidance	International organisation	https://one.oecd.org/document/ENV/CBC/MONO(2022)30/en/pdf	Materials	Nanomaterials	not specified	0	1	0	0	1	Resources-, processing, and product- related	Energy	Energy consumption (kWh or MJ)	1	ENV+SAF+SOC
2022	OECD	OECD2022	1	Guidance	International organisation	https://one.oecd.org/document/ENV/CBC/MONO(2022)30/en/pdf	Materials	Nanomaterials	not specified	0	1	0	0	1	Social	consumer	Content of natural substances (%)	1	ENV+SAF+SOC
2022	OECD	OECD2022	1	Guidance	International organisation	https://one.oecd.org/document/ENV/CBC/MONO(2022)30/en/pdf	Materials	Nanomaterials	not specified	0	1	0	0	1	Social	workers	Workers health & safety	1	ENV+SAF+SOC
2022	OECD	OECD2022	1	Guidance	International organisation	https://one.oecd.org/document/ENV/CBC/MONO(2022)30/en/pdf	Materials	Nanomaterials	not specified	0	1	0	0	1	Social	value chain actors	promoting social responsibility	1	ENV+SAF+SOC
2021	OECD	OECD2021	0	Guidance	International organisation	https://www.oecd.org/chemicalsafety/risk-management/guidance-on-key-considerations-for-the-identification-and-selection-of-safer-chemical-alternatives.pdf	Chemicals	not specified	not specified	0	1	1	1	1	Environmental	Climate Change	GWP 100 (kg CO₂eq)	1	ENV+SAF
2021	OECD	OECD2021	0	Guidance	International organisation	https://www.oecd.org/chemicalsafety/risk-management/guidance-on-key-considerations-for-the-identification-and-selection-of-safer-chemical-alternatives.pdf				0	1	1	1	1	Environmental	Integrated Assessment	Chemicals safety	1	ENV+SAF
2021	OECD	OECD2021	0	Guidance	International organisation	https://www.oecd.org/chemicalsafety/risk-management/guidance-on-key-considerations-for-the-identification-and-selection-of-safer-chemical-alternatives.pdf				0	1	1	1	1	Resources-, processing, and product- related	Resources: types, quantity, and efficiency considerations	Resources Consumption	1	ENV+SAF
2021	OECD	OECD2021	0	Guidance	International organisation	https://www.oecd.org/chemicalsafety/risk-management/guidance-on-key-considerations-for-the-identification-and-selection-of-safer-chemical-alternatives.pdf				0	1	1	1	1	Resources-, processing, and product- related	Circularity	Recyclability/circularity (conceptual)	1	ENV+SAF
2021	OECD	OECD2021	0	Guidance	International organisation	https://www.oecd.org/chemicalsafety/risk-management/guidance-on-key-considerations-for-the-identification-and-selection-of-safer-chemical-alternatives.pdf				0	1	1	1	1	Resources-, processing, and product- related	Circularity	Boiling temperature (°C)	1	ENV+SAF
2021	OECD	OECD2021	0	Guidance	International organisation	https://www.oecd.org/chemicalsafety/risk-management/guidance-on-key-considerations-for-the-identification-and-selection-of-safer-chemical-alternatives.pdf				0	1	1	1	1	Social	value chain actors	Supply chain responsibility score [-]	1	ENV+SAF
2015	Tony Phan et al.	Tony Phan et al.2015	1	Scientific article	Industry	https://doi.org/10.1039/C4GC02169J	chemicals	Fragrance	not specified	0	1	1	0	1	Resources-, processing, and product- related	Resources: types, quantity, and efficiency considerations	Raw material origin [-]	1	ENV+SAF
2015	Tony Phan et al.	Tony Phan et al.2015	1	Scientific article	Industry	https://doi.org/10.1039/C4GC02169J	chemicals	Fragrance	not specified	0	1	1	0	1	Resources-, processing, and product- related	Resources: types, quantity, and efficiency considerations	Solvent selectivity [-]	1	ENV+SAF
2015	Tony Phan et al.	Tony Phan et al.2015	1	Scientific article	Industry	https://doi.org/10.1039/C4GC02169J	chemicals	Fragrance	not specified	0	1	1	0	1	Resources-, processing, and product- related	Energy	Reaction efficiency (%)	1	ENV+SAF
2015	Tony Phan et al.	Tony Phan et al.2015	1	Scientific article	Industry	https://doi.org/10.1039/C4GC02169J	chemicals	Fragrance	not specified	0	1	1	0	1	Resources-, processing, and product- related	Energy	Process efficiency (%)	1	ENV+SAF
2015	Tony Phan et al.	Tony Phan et al.2015	1	Scientific article	Industry	https://doi.org/10.1039/C4GC02169J	chemicals	Fragrance	not specified	0	1	1	0	1	Resources-, processing, and product- related	Resources: types, quantity, and efficiency considerations	Mass yeld [%]	1	ENV+SAF
2015	Tony Phan et al.	Tony Phan et al.2015	1	Scientific article	Industry	https://doi.org/10.1039/C4GC02169J	chemicals	Fragrance	not specified	0	1	1	0	1	Resources-, processing, and product- related	Energy	Number of steps [-]	1	ENV+SAF
2015	Tony Phan et al.	Tony Phan et al.2015	1	Scientific article	Industry	https://doi.org/10.1039/C4GC02169J	chemicals	Fragrance	not specified	0	1	1	0	1	Resources-, processing, and product- related	Resources: types, quantity, and efficiency considerations	Number of solvents [-]	1	ENV+SAF
2015	Tony Phan et al.	Tony Phan et al.2015	1	Scientific article	Industry	https://doi.org/10.1039/C4GC02169J	chemicals	Fragrance	not specified	0	1	1	0	1	Resources-, processing, and product- related	Resources: types, quantity, and efficiency considerations	carbon economy [-]	1	ENV+SAF
2014	Leseurre et al.	Leseurre et al.2014	1	Scientific article	Industry	https://doi.org/10.1039/C3GC42201A	chemicals	not specified	not specified	0	0	1	0	0	Resources-, processing, and product- related	Resources: types, quantity, and efficiency considerations	Atom economy (%)	1	ENV
2014	Leseurre et al.	Leseurre et al.2014	1	Scientific article	Industry	https://doi.org/10.1039/C3GC42201A	chemicals	not specified	not specified	0	0	1	0	0	Resources-, processing, and product- related	Resources: types, quantity, and efficiency considerations	E-factor (%)	1	ENV
2014	Leseurre et al.	Leseurre et al.2014	1	Scientific article	Industry	https://doi.org/10.1039/C3GC42201A	chemicals	not specified	not specified	0	0	1	0	0	Resources-, processing, and product- related	Resources: types, quantity, and efficiency considerations	Mass yeld	1	ENV
2014	Leseurre et al.	Leseurre et al.2014	1	Scientific article	Industry	https://doi.org/10.1039/C3GC42201A	chemicals	not specified	not specified	0	0	1	0	0	Resources-, processing, and product- related	Energy	Reaction efficiency (%)	1	ENV
2014	Leseurre et al.	Leseurre et al.2014	1	Scientific article	Industry	https://doi.org/10.1039/C3GC42201A	chemicals	not specified	not specified	0	0	1	0	0	Resources-, processing, and product- related	Energy	Stoichiometric factor	1	ENV
2014	Leseurre et al.	Leseurre et al.2014	1	Scientific article	Industry	https://doi.org/10.1039/C3GC42201A	chemicals	not specified	not specified	0	0	1	0	0	Resources-, processing, and product- related	Resources: types, quantity, and efficiency considerations	Global material economy (%)	1	ENV
2014	Leseurre et al.	Leseurre et al.2014	1	Scientific article	Industry	https://doi.org/10.1039/C3GC42201A	chemicals	not specified	not specified	0	0	1	0	0	Resources-, processing, and product- related	Resources: types, quantity, and efficiency considerations	Water consumption (m3)	1	ENV
2014	Leseurre et al.	Leseurre et al.2014	1	Scientific article	Industry	https://doi.org/10.1039/C3GC42201A	chemicals	not specified	not specified	0	0	1	0	0	Resources-, processing, and product- related	Resources: types, quantity, and efficiency considerations	Raw material origin [-]	1	ENV
2014	Leseurre et al.	Leseurre et al.2014	1	Scientific article	Industry	https://doi.org/10.1039/C3GC42201A	chemicals	not specified	not specified	0	0	1	0	0	Resources-, processing, and product- related	Circularity	Aqueous waste valorization [-]	1	ENV
2014	Leseurre et al.	Leseurre et al.2014	1	Scientific article	Industry	https://doi.org/10.1039/C3GC42201A	chemicals	not specified	not specified	0	0	1	0	0	Resources-, processing, and product- related	Circularity	used organic solvents valorization [-]	1	ENV
2014	Leseurre et al.	Leseurre et al.2014	1	Scientific article	Industry	https://doi.org/10.1039/C3GC42201A	chemicals	not specified	not specified	0	0	1	0	0	Resources-, processing, and product- related	Energy	Process carbon footprint	1	ENV
2018	Roschangar et al.	Roschangar et al.2018	1	Scientific article	Academia	https://pubs.rsc.org/en/content/articlelanding/2018/gc/c8gc00616d/unauth	chemicals	not specified	pharmaceutical	0	0	0	0	0	Resources-, processing, and product- related	Resources: types, quantity, and efficiency considerations	Relative Process Greenness [-]	1	ENV
2018	Roschangar et al.	Roschangar et al.2018	1	Scientific article	Academia	https://pubs.rsc.org/en/content/articlelanding/2018/gc/c8gc00616d/unauth	chemicals	not specified	pharmaceutical	0	0	0	0	0	Resources-, processing, and product- related	Circularity	Waste reduction [-]	1	ENV
2018	Roschangar et al.	Roschangar et al.2018	1	Scientific article	Academia	https://pubs.rsc.org/en/content/articlelanding/2018/gc/c8gc00616d/unauth	chemicals	not specified	pharmaceutical	0	0	0	0	0	Resources-, processing, and product- related	Resources: types, quantity, and efficiency considerations	E-factor (%)	1	ENV

## Sheet: Indicators definitions
Indicator	dimension	Aspect - level 1	Aspect - level 2	Indicator type	Indicator definition	Assessment method	Comment LM
Renewable or fossil? (yes/no)	Resources-, processing, and product- related	Resources: types, quantity, and efficiency considerations		Logical	Origin of the feedstock/energy i.e. fossil or renewable?	Check the type of feedstock/energy used
Imported resources	Resources-, processing, and product- related	Resources: types, quantity, and efficiency considerations		Logical	Amount of imported resources	Accounting
Raw material origin [-]	Resources-, processing, and product- related	Resources: types, quantity, and efficiency considerations		Logical	Origin of the raw materials, i.e. synthetic raw materials , raw materials from hemi-synthesis or natural raw materials	Accounting
Renewability of resources	Resources-, processing, and product- related	Resources: types, quantity, and efficiency considerations		Logical	Proportion of raw materials required for production which can be considered renewable	Percentage
Recycled input materials (%)	Resources-, processing, and product- related	Resources: types, quantity, and efficiency considerations		Logical	amount of recycled raw materials used for the production
Solvent selectivity [-]	Resources-, processing, and product- related	Resources: types, quantity, and efficiency considerations		Logical	choice of the solvent considering its environmental impact	Accountability (e.g. water or supercriti-cal carbon dioxide)
Use of critical raw materials? (yes/no)	Resources-, processing, and product- related	Resources: types, quantity, and efficiency considerations		Logical	Use of materials that are present in the list of critical raw materials made by the EC	Materials listed at https://ec.europa.eu/growth/sectors/raw-materials/specific-interest/critical_en
Hazard waste	Resources-, processing, and product- related	Resources: types, quantity, and efficiency considerations		Quantitative	Amount of hazard waste generated during the production	Measurement
Non hazard waste	Resources-, processing, and product- related	Resources: types, quantity, and efficiency considerations		Quantitative	Amount of non hazard waste generated during the production	Measurement
Water consumption (m3)	Resources-, processing, and product- related	Resources: types, quantity, and efficiency considerations		Quantitative	Amount of water consumed by a process, product or system	Measurement
Net mass of materials consumed (kg)	Resources-, processing, and product- related	Resources: types, quantity, and efficiency considerations		Quantitative	Kg of materials used over the life cycle	Curzons et al., 2007 http://dx.doi.org/10.1065/lca2007.03.315
biomass consumption	Resources-, processing, and product- related	Resources: types, quantity, and efficiency considerations		Quantitative	Amount of biomass consumed over the production
Resources consumption	Resources-, processing, and product- related	Resources: types, quantity, and efficiency considerations		Quantitative	Not provided	Akadiri & Olomolaiye., 2012; Cole, 2005; CPWD, 2014; G. K C Ding, 2013; Grace K.C. Ding, 2008; Khoshnava et al., 2018; Kylili et al., 2016; Sabaghi et al., 2016
Raw materails consumption (Kg/ton)	Resources-, processing, and product- related	Resources: types, quantity, and efficiency considerations		Quantitative	Amount of raw material consumed for the production	Measurement
Non - Renewable resources amount	Resources-, processing, and product- related	Resources: types, quantity, and efficiency considerations		Quantitative	Amount of raw material consumed for the production coming from non-renewable sources	Measurement
Renewable resources amount	Resources-, processing, and product- related	Resources: types, quantity, and efficiency considerations		Quantitative	Amount of raw material consumed for the production coming from non-renewable sources	Measurement
Solid waste generation	Resources-, processing, and product- related	Resources: types, quantity, and efficiency considerations		Quantitative	Solid waste generated
Waste characterisation potential (kg)	Resources-, processing, and product- related	Resources: types, quantity, and efficiency considerations		Quantitative	not found
Solid waste (kg/ton)	Resources-, processing, and product- related	Resources: types, quantity, and efficiency considerations		Quantitative	Solid waste generated
Amount of (solid/water) waste (kg or %)	Resources-, processing, and product- related	Resources: types, quantity, and efficiency considerations		Quantitative	Mass of waste generated e.g. solid waste or wastewater	Measurement
Fossil fuel consumption	Resources-, processing, and product- related	Resources: types, quantity, and efficiency considerations		Quantitative	Amount of fuel consumed
water footprints	Environmental	Resources		Quantitative
Reaction efficiency (%)	Resources-, processing, and product- related	Resources: types, quantity, and efficiency considerations		Quantitative	Yield or efficiency of a biochemical or thermochemical reaction	Measurement
Atom economy (%)	Resources-, processing, and product- related	Resources: types, quantity, and efficiency considerations		Quantitative	Conversion efficiency of a chemical process in terms of all atoms involved and the desired products produced	Trost, 1991 https://doi.org/10.1126/science.1962206
Water Efficiency	Resources-, processing, and product- related	Resources: types, quantity, and efficiency considerations		Quantitative
Water and Waste water productivity strategies	Resources-, processing, and product- related	Resources: types, quantity, and efficiency considerations		Qualitative
Material intensity index (%)	Resources-, processing, and product- related	Resources: types, quantity, and efficiency considerations		Quantitative	Ratio between the kg of material used per kg of product	Cervera-Padrell et al., https://doi.org/10.1016/j.ejpb.2012.07.001
Material conservation	Resources-, processing, and product- related	Resources: types, quantity, and efficiency considerations
Resources efficiency	Resources-, processing, and product- related	Resources: types, quantity, and efficiency considerations
Resources valorization	Resources-, processing, and product- related	Resources: types, quantity, and efficiency considerations
Waste cleaning	Resources-, processing, and product- related	Resources: types, quantity, and efficiency considerations
Waste Reduction Algorithm	Resources-, processing, and product- related	Resources: types, quantity, and efficiency considerations
E-factor (%)	Resources-, processing, and product- related	Resources: types, quantity, and efficiency considerations		Quantitative	The ratio of the mass of waste per mass of product	Sheldon, 2017 https://doi.org/10.1039/C6GC02157C
Number of solvents	Resources-, processing, and product- related	Resources: types, quantity, and efficiency considerations		Quantitative	Number of solvents used in the process
Carbon economy (%)	Resources-, processing, and product- related	Resources: types, quantity, and efficiency considerations		Accountancy	Ratio between the number of carbons of proucts and the number of carbon of reactancts
Mass yeld	Resources-, processing, and product- related	Resources: types, quantity, and efficiency considerations		Accountancy		not explained
Global material economy (%)	Resources-, processing, and product- related	Resources: types, quantity, and efficiency considerations			Percentage of product obtained considering the total mass of raw materials	Leseurre et al.2023
Water consumption (m3)	Resources-, processing, and product- related	Resources: types, quantity, and efficiency considerations		Accountancy	all water needed to prepare reaction vessels, to perform the process (chemical reactions, isolation, exchanging ion resins regene-ration, etc.) and to clean equipment.	Measurement
Relative Process Greenness [-]	Resources-, processing, and product- related	Resources: types, quantity, and efficiency considerations				Roschangar et al.2018
Recyclability/circularity (conceptual)	Resources-, processing, and product- related	Circularity		Circularity Feature	The proposer of the framework remarks the importance to keep into account this aspect but does not suggest or recommend any methods/metrics.	Bansal et al., 2015; CPWD, 2014;G. K C Ding, 2013; Gao et al., 2010; Mayyas et al., 2016; Sabaghi et al., 2016; Valenzuela-Venegas et al., 2016
Waste utilization	Resources-, processing, and product- related	Circularity		Accountancy	Amount of waste utilized	Measurement
Reuse rate/reusability	Resources-, processing, and product- related	Circularity
Recycled content (%)	Resources-, processing, and product- related	Circularity		Circularity Feature	Percentage of recycled content in the product	Measurement
Recyclabile? (yes/no)	Resources-, processing, and product- related	Circularity		Logical	Answer to the question: are all components of the product recyclable? Or is the chemical recyclable after its use?	Check e.g. the product or chemical’s physicochemical properties and the last type of use of the product/chemical.
Percentage of reclaimed products and their packaging materials (%)	Resources-, processing, and product- related	Circularity		Quantitative	Ratio between the total recycled input materials used and the total input materials used	GRI301: Materials 'https://www.globalreporting.org/standards/media/1008/gri-301-materials-2016.pdf#:~:text=GRI%20301addresses%20the%20topic%20of%20materials.%20The%20inputs,be%20composed%20of%20virgin%20or%20recycled%20input%20materials.
Disassembly/reparability design (conceptual)	Resources-, processing, and product- related	Circularity		Product-circularity Feature (not applicable to chemical itself)	The proposer of the framework notes the importance to account for this aspect but does not suggest or recommend any specific methods/metrics.	[-}
Boiling temperature (°C)	Resources-, processing, and product- related	Circularity		Physicochemical property	Boiling temperature is used as a proxy for easiness to be recycled (since often the recycling is done via distillation)	Measurement
Durability (years)	Resources-, processing, and product- related	Circularity		Product circularity Feature	Measurement of how long a product may last, while performing its function.	Measurement
Durability of the building	Resources-, processing, and product- related	Circularity
Recycling efficiency/recovery rate (%)	Resources-, processing, and product- related	Circularity		Technical measure of performance	Percentage of recovered material/chemical from a recycling process.	Measurement
Purity of recovered solvent (%)	Resources-, processing, and product- related	Circularity		Circularity Feature	Percentage of purity of the solvent obtained from the recycling process.	Measurement
Solvent selectivity [-]	Resources-, processing, and product- related	Circularity		Physicochemical property	The ability of a given solvent to selectively dissolve one compound as opposed to another	Measurement
Yield of extraction (%)	Resources-, processing, and product- related	Circularity		Technical measure of performance	Yield or efficiency of a thermochemical extraction process aiming at recycling a solvent.	Measurement
Heat of vaporisation (MJ/kg)	Resources-, processing, and product- related	Circularity		Physicochemical property	Heat of vaporisation is used as a proxy for the energy required for recycling this substance (since often the recycling is done via distillation)	Measurement
Energy requirement for recycling (MJ/kg)	Resources-, processing, and product- related	Circularity		Technical measure of performance	Measure of the energy consumed by the recycling process per kg of product recovered	Measurement
Number of carbon atoms	Resources-, processing, and product- related	Circularity		Physicochemical property	Linked with the capability of solvents to segregate sludge from waste lubricating oils and make this system circular.	Measurement. Application detailed in Pinheiro et al. (2018).
Aqueous waste valorization [-]	Resources-, processing, and product- related	Circularity			how aqueous wastes are dealt with on Chimex industrial plants which comprise biological water treatment and phytoremediation plants.	Leseurre et al.2023
used organic solvents valorization [-]	Resources-, processing, and product- related	Circularity			A valorization percen-tage is calculated according to the valorization factors attribu-ted to every solvent depending on its recycling (1), incineration to produce steam (0.5) or neither (0).	Leseurre et al.2023
Marine biodegradability (conceptual)	Resources-, processing, and product- related	Biodegradability		Physicochemical property	The proposer of the framework remarks the importance to keep into account this aspect but does not suggest or recommend any methods/metrics.	[-]
Soil biodegradability (conceptual)	Resources-, processing, and product- related	Biodegradability		Physicochemical property	The proposer of the frameworkremarks the importance to keep into account this aspect but does not suggest or recommend any methods/metrics.	[-]
Biodegradablity (not specified)	Resources-, processing, and product- related	Biodegradability		Physicochemical property	A possible model to be used to measure biodegradability is cited.	Arnot, J. A.; Mackay, D.; Parkerton, T. F.; Bonnell, M. A. Database of Fish Biotransformation Rates for Organic Chemicals. Environ. Toxicol. Chem. 2008, 27, 2263−2270. Arnot, J. A.; Mackay, D.; Bonnell, M. Estimating metabolic biotransformation rates in fish from laboratory data. Environ. Toxicol. Chem. 2008, 27, 341−351.
Biodegradability (conceptual)	Resources-, processing, and product- related	Biodegradability		Physicochemical property	The proposer of the framework remarks the importance to keep into account this aspect but does not suggest or recommend any methods/metrics.	[-]
Biodegradability requirement (EU law specification)	Resources-, processing, and product- related	Biodegradability		Physicochemical property	The product must be biodegradable with the term "biodegradable" linked to its defition in a specific regulation	The cited specification was an EU regulation such as REACH or EU standards for composting. Specifically for detergents,d etergent surfactants substances used must be completely biodegradable in accordance with the EC Regulation on Detergents (Regulation (EC) No 648/2004).
Octanot-water distribution coeffieicnt (KOC)	Resources-, processing, and product- related	Biodegradability		Quantitative
Energy consumption (kWh or MJ)	Resources-, processing, and product- related	Energy		Quantitative	Measure of the energy consumed by a process, product or system	Measurement
Energy efficiency (%)	Resources-, processing, and product- related	Energy		Technical measure of performance	Ratio between the energy produced and the energy carrier input	Measurement
Cumulative energy demand (MJ)	Resources-, processing, and product- related	Energy		LCT accounting	Sum of direct and indirect energy use throughout the life cycle	Huijbregts et al., 2010. https://doi.org/10.1021/es902870s
Recycling energy	Resources-, processing, and product- related	Energy		Quantitative	not clear from the paper	not explained
Energy intensity	Resources-, processing, and product- related	Energy		Quantitative	Rratio of the energy input to the process and to the mass of the product	MJ/Kg of production https://journals.sagepub.com/doi/10.1177/1464420720966347
Energy conservation	Resources-, processing, and product- related	Energy			not explained	not explained
Renewable Resources with energy content (MJ)	Resources-, processing, and product- related	Energy		Impact (no LCA)		EN 15804:2013. Sustainability of Construction Works—Environmental Product Declarations—Core Rules for the Product Category of Construction Products
Primary Energy Demand	Resources-, processing, and product- related	Energy		LCA impact	It consists of fuels energy of each process and feedstock energy referred to the product/chemical	not explained
Non-renewable resources with energy content (MJ)	Resources-, processing, and product- related	Energy		Impact (no LCA)		EN 15804:2013. Sustainability of Construction Works—Environmental Product Declarations—Core Rules for the Product Category of Construction Products
Process efficiency	Resources-, processing, and product- related	Energy		Quantitative	rating the heating/cooling processes and the process time.	Tony Phan et al.2015
Number of steps	Resources-, processing, and product- related	Energy		accounting	Reduction of the number of process steps	not explained
Stoichiometric factor	Resources-, processing, and product- related	Energy			Excess of reactants	Leseurre et al.2023
Process carbon footprint	Resources-, processing, and product- related	Energy			Energetic evaluation	To determine the global energy consumption of a production plant over a year expressed as an energetic carbon footprint, data concerning energy use and carbon emissions were taken into account (electricity, steam, fuel, cooling liquids, etc.) and converted into CO2 equivalents through emission factors. (Leseurre et al.2023)
Fine particulate matter (mg PM 2.5)	Environmental	Air emission	Atmospheric emissions	Pressure	Amount of fine particulate matter emitted.	Measurement of tiny particles or droplets emitted to the air that are two and one-half microns or less in width
Atmospheric VOC emissions (g)	Environmental	Air emission		Pressure	The sum of emissions of VOCs to air of a process, system or life cycle	Measurement of VOCs emissions
Atmospheric SO2 emissions (g)	Environmental	Air emission		Pressure	The sum of emissions of SO2 to air of a process, system or life cycle	Measurement of SO2 emissions e.g. from fuel combustion in a vehicle
Atmospheric NOx emissions (g)	Environmental	Air emission		Pressure	The sum of emissions of NOx to air of a process, system or life cycle	Measurement of NOx emissions e.g. from fuel combustion in a vehicle
Atmospheric CO2 emissions (g)	Environmental	Air emission		Pressure	The sum of emissions of CO2 to air of a process, system or life cycle.	Measurement
Dimethylformamide (g)	Environmental	Air emission		Pressure	Emissions of dimethylformamide	Measurement
Air emissions	Environmental	Air emission		Pressure	Carbon monoxide (CO), volatile organic compounds (VOCs), nitrogen oxides (NOX), particulate matter (PM) and sulphur oxides (SOX)
Critical air mass (%)	Environmental	Air emission		Pressure	Indicator representing the mass of air emissions over a standard value (maximum acceptable amount of pollutants)	Stefanis et al., https://doi.org/10.1016/0098-1354(96)00243-8
Critical water mass (%)	Environmental	Water emission	Water emissions	Pressure	Indicator representing the mass of air emissions over a standard value (maximum acceptable amount of pollutants)	Stefanis et al., https://doi.org/10.1016/0098-1354(96)00243-9
Biological oxigen demand 5 (g)	Environmental	Water emission		Pressure	Measure of the amount of oxygen consumed by bacteria and other microorganisms while they decompose organic matter under aerobic (oxygen is present) conditions at a specified temperature i.e. 5 days of incubation at 20 °C.	Clair N. Sawyer; Perry L. McCarty; Gene F. Parkin (2003). Chemistry for Environmental Engineering and Science (5th ed.). New York: McGraw-Hill. ISBN 978-0-07-248066-5.
Chemical oxigen demand (g)	Environmental	Water emission		Pressure	Measure of the amount of oxygen that can be consumed by reactions in a measured solution	Clair N. Sawyer; Perry L. McCarty; Gene F. Parkin (2003). Chemistry for Environmental Engineering and Science (5th ed.). New York: McGraw-Hill. ISBN 978-0-07-248066-5.
Total organic carbon (kg)	Environmental	Water emission		Pressure	Total soluble and insoluble organic matter going into water bodies	Goerlitz DF, Brown E. Methods for analysis of organic substances in water. Tech Water-Resources Investig United States Geol Surv 1972
Water emissions	Environmental	Water emission		Pressure	chemical oxygen demand (COD), lead (Pb), ammonium (NH4 +)
Water discharge quality	Environmental	Water emission		Pressure
contaminants emission	Environmental	Water emission		Pressure
Soil emissions	Environmental	Soil emission		Pressure
GWP 100 (kg CO₂eq)	Environmental	Climate Change		LCA midpoint impact	The heat absorbed by any greenhouse gas in the atmosphere, as a multiple of the heat that would be absorbed by the same mass of carbon dioxide. The calculations depend on the time-scale , typically 100 years, since gases decay in the atmosphere or are absorbed naturally, at different rates	IPCC 2013, GWP 100a with carbon climate feedback. Hartmann et al. (2013).https://doi.org/10.1017/CBO9781107415324
Climate change damage (DALY)	Environmental	Climate Change		LCA endpoint impact	Endpoint life cycle impact in the damage category "climate change".	ReCipe impact method. ReCiPe 2016 A harmonized life cycle impact assessment method at midpoint and endpoint level Report I: Characterization_x000D_Available at https://www.rivm.nl/bibliotheek/rapporten/2016-0104.pdf
C factor	Environmental	Climate Change		Impact (no LCA)
CO2 balance	Environmental	Climate Change		Impact (no LCA)
Climate change (conceptual)	Environmental	Climate Change		Impact (no LCA)	The proposer of the framework remarks the importance to keep into account this aspect but does not suggest or recommend any specific methods/metrics.	[-]
Ecotoxicity (not specified)	Environmental	Toxicity	Ecotoxicity	LCA midpoint impact	The proposer of the framework reccomends to account for this category and suggests some possible methods/metrics without expressing a clear preference.	EDIP97 (Wenzel et al., 1997. Environmental Assessment of Products. Vol. 1 - Methodology, tools and case studies in product development) ISBN 0-412-80800-5), CML2001 (CML 2001 method. Guine JB (2001): Life Cycle Assessment: An operational guide to the ISO Standards; LCA in Perspective; Guide; Leiden Unirversity. May 2001), Usetox (Rosenbaum et al., 2008. https://doi.org/10.1007/s11367-008-0038-4) …
Ecotoxicity damage (PDF m3 d)	Environmental	Toxicity	Ecotoxicity	LCA endpoint impact	Life cycle impact in the damage category "ecotoxicity".	Used by Fantke et al. 2020 http://dx.doi.org/10.1039/d0gc01544j
Marine ecotoxicity (g C6H4CI2-eq)	Environmental	Toxicity	Ecotoxicity	LCA midpoint impact	Overall potential to cause a toxical damage to the marine environment by accounting for environmental fate, exposure and effects	ReCipe impact method. ReCiPe 2016 A harmonized life cycle impact assessment method at midpoint and endpoint level Report I: Characterization_x000D_Available at https://www.rivm.nl/bibliotheek/rapporten/2016-0104.pdf
Freshwater ecotoxicity (g C6H4CI2-eq)	Environmental	Toxicity	Ecotoxicity	LCA midpoint impact	Overall potential to cause a toxical damage to the aquatic environment by accounting for environmental fate, exposure and effects	ReCipe impact method. ReCiPe 2016 A harmonized life cycle impact assessment method at midpoint and endpoint level Report I: Characterization_x000D_Available at https://www.rivm.nl/bibliotheek/rapporten/2016-0104.pdf
Ecotoxicity (CTU)	Environmental	Toxicity	Ecotoxicity	LCA midpoint impact	Overall potential to cause a toxical damage to the aquatic environment by accounting for environmental fate, exposure and effects	USEtox characterisation modelling. Rosenbaum et al., 2008. https://doi.org/10.1007/s11367-008-0038-3
Freshwater (eco)toxicity (CTUe)	Environmental	Toxicity	Ecotoxicity	LCA midpoint impact	Overall potential to cause a toxical damage to the environment by accounting for environmental fate, exposure and effects	USEtox characterisation modelling. Rosenbaum et al., 2008. https://doi.org/10.1007/s11367-008-0038-4
Terrestrial ecotoxicity (g C6H4CI2-eq)	Environmental	Toxicity	Ecotoxicity	LCA midpoint impact	Overall potential to cause a toxical damage to the terrestrial environment by accounting for environmental fate, exposure and effects	ReCipe impact method. ReCiPe 2016 A harmonized life cycle impact assessment method at midpoint and endpoint level Report I: Characterization_x000D_Available at https://www.rivm.nl/bibliotheek/rapporten/2016-0104.pdf
Bioconcentration factor	Environmental	Toxicity	Ecotoxicity	Impact (no LCA)	the bioconcentration factor is the ratio between the contaminant concentrations in the organisms (μg/kg) under equilibrium condition and the contaminant concentration in the water
Human toxicity (not specified)	Environmental	Toxicity	Human toxicity	LCA midpoint impact	The proposer of the framework reccomends to account for this category and suggests some possible methods/metrics without expressing a clear preference.	EDIP97 (Wenzel et al., 1997. Environmental Assessment of Products. Vol. 1 - Methodology, tools and case studies in product development) ISBN 0-412-80800-5), CML2001 (CML 2001 method. Guine JB (2001): Life Cycle Assessment: An operational guide to the ISO Standards; LCA in Perspective; Guide; Leiden Unirversity. May 2001), Usetox (Rosenbaum et al., 2008. https://doi.org/10.1007/s11367-008-0038-4) …
Human toxicity potential (kg 1,4 DCB eq or CTUh)	Environmental	Toxicity	Human toxicity	LCA midpoint impact	Overall potential to cause toxicity to humans based on fate, exposure, and effects of toxic substances for an infinite time horizon. The geographic scope of this indicator determines on the fate of a substance and can vary between local and global scale.	CML 2001 method. Guine JB (2001): Life Cycle Assessment: An operational guide to the ISO Standards; LCA in Perspective; Guide; Leiden Unirversity. May 2001
Human toxicity – no cancer potential (CTUh)	Environmental	Toxicity	Human toxicity	LCA midpoint impact	Overall potential to cause toxicity without cancer effects to humans based on fate, exposure, and effects of toxic substances for an infinite time horizon. The geographic scope of this indicator determines on the fate of a substance and can vary between local and global scale.	USEtox characterisation modelling. Rosenbaum et al., 2008. https://doi.org/10.1007/s11367-008-0038-4
Human toxicity – cancer potential (CTUh)	Environmental	Toxicity	Human toxicity	LCA midpoint impact	Overall potential to cause toxicity with cancer effects to humans based on fate, exposure, and effects of toxic substances for an infinite time horizon. The geographic scope of this indicator determines on the fate of a substance and can vary between local and global scale.	USEtox characterisation modelling. Rosenbaum et al., 2008. https://doi.org/10.1007/s11367-008-0038-5
LCT human toxicity (mg intake)	Environmental	Toxicity	Human toxicity	LCA midpoint impact	Mass balance structuring multimedia chemical transfers in a matrix of direct inter-compartmental transfer fractions to consistently evaluate exposure pathways along product life cycles	Fantke et al., 2016. http://dx.doi.org/10.1016/j.envint.2016.06.010 Martin, 2017 http://dx.doi.org/10.1007/s10098-016-1300-2 Smith et al., 2015 https://doi.org/10.1016/j.compchemeng.2015.04.020
Air pollution (DALYs) - airpollution and acidification	Environmental	Toxicity	Human toxicity
smog potential (Kg Nox eq)	Environmental	Toxicity	Human toxicity
Indoor air quality	Environmental	Toxicity	Human toxicity
LCT human toxicity (mg intake)	Environmental	Toxicity	Human toxicity
Respiratory inorganics	Environmental	Toxicity	Human toxicity
Ionizing radiation-Human health (DALY)	Environmental	Ionizing radiation		LCA endpoint impact	Measure of human health damages related to the man-made routine releases of radioactive material to the environment.	ReCipe impact method. ReCiPe 2016 A harmonized life cycle impact assessment method at midpoint and endpoint level Report I: Characterization_x000D_Available at https://www.rivm.nl/bibliotheek/rapporten/2016-0104.pdf
Ionizing radiation (kBq U235 eq)	Environmental	Ionizing radiation		LCA midpoint impact	Measure of human health damages related to the man-made routine releases of radioactive material to the environment.	Frischknecht et al., 2000. http://dx.doi.org/10.1016/S0195-9255(99)00042-6
Atmospheric acidification (kg SO2eq)	Environmental	Acidification		LCA midpoint impact	The aggregate measure of the acidifying potential of atmospheric pollution arising from anthropogenically derived sulphur (S) and nitrogen (N)	IChemE, 2010. The sustainability metrics Sustainable development progress metrics. Recommended for use in the process industries.
Aquatic acidification (kg H+ ions)	Environmental	Acidification		LCA midpoint impact	The aggregate measure of the acidifying potential of aquatic pollution arising from anthropogenically derived sulphur (S) and nitrogen (N)	IChemE, 2010. The sustainability metrics Sustainable development progress metrics. Recommended for use in the process industries.
Terrestrial acidification (kg SO2eq)	Environmental	Acidification		LCA midpoint impact	The aggregated measure of proton increase in natural soils.	ReCipe impact method. ReCiPe 2016. Guine JB (2001): Life Cycle Assessment: An operational guide to the ISO Standards; LCA in Perspective; Guide; Leiden Unirversity,May 2001. A harmonized life cycle impact assessment method at midpoint and endpoint level Report I: Characterization_x000D_Available at https://www.rivm.nl/bibliotheek/rapporten/2016-0104.pdf
Acidification potential (molc H+ eq)	Environmental	Acidification		LCA midpoint impact	The aggregate measure of the acidifying potential of some substances, calculated through the conversion factor of sulphur oxides and nitrogen and ammonia into acidification equivalents.	Posch et al. (2008). https://doi.org/10.1007/s11367-008-0025-9 Goedkoop et al.(2009). https://doi.org/10.029/2003JD004283 CML 2001 method.
Terrestrial eutrophication potential (kg of N equivalents)	Environmental	Eutrophication		LCA midpoint impact	Potential impacts on terrestrial environment due to nutrient excess	Posch et al. (2008). https://doi.org/10.1007/s11367-008-0025-9 Goedkoop et al.(2009). https://doi.org/10.029/2003JD004283 CML 2001 method.
Eutrophication potential (kg of phosphate )	Environmental	Eutrophication		LCA midpoint impact	Potential impacts on terrestrial and aquatic environments due to over-fertilisation	Guine JB (2001): Life Cycle Assessment: An operational guide to the ISO Standards; LCA in Perspective; Guide; Leiden Unirversity. May 2001)
Freshwater eutrophication potential (kg P eq)	Environmental	Eutrophication		LCA midpoint impact	Potential to cause over-fertilisation of water	ReCipe impact method. ReCiPe 2016 A harmonized life cycle impact assessment method at midpoint and endpoint level Report I: Characterization_x000D_Available at https://www.rivm.nl/bibliotheek/rapporten/2016-0104.pdf
Marine eutrophication potential (mol N eq)	Environmental	Eutrophication		LCA midpoint impact	Potential to cause over-fertilisation of soil	ReCipe impact model. ReCiPe 2016 A harmonized life cycle impact assessment method at midpoint and endpoint level Report I: Characterization_x000D_Available at https://www.rivm.nl/bibliotheek/rapporten/2016-0104.pdf
Ozone depletion (conceptual)	Environmental	Stratospheric ozone Depletion		Impact (no LCA)	The proposer of the framework remarks the importance to keep into account this aspect but does not suggest or recommend any specific methods/metrics.	[-]
Ozone depletion potential (kg CFC-11)	Environmental	Stratospheric ozone Depletion		LCA midpoint impact	Relative measure of the expected impact on ozone per unit mass emission of a gas as compared to that expected from the same mass emission of CFC-11.	Ramanathan and Feng (2009). https://doi.org/10.1016/j.atmosenv.2008.09.063
Particulate matter (PM 2.5eq)	Environmental	Particulate Matter		LCA midpoint impact	Particulate matter expressed in relative human health effect compared to fine particulate matter	Rabl et al. (2014). https://doi.org/10.1017/CBO9781107337831.020
POCP (kg of ethene-eq or Kg NMVOC or kg O3)	Environmental	Photochemical Ozone Formation		LCA midpoint impact	Potential to create photochemical oxidants (smog formation). This impact category is determined by comparing the rate at which a unit mass of chemical reacts with a hydroxyl radical (OH·) to the rate at which a unit mass of ethylene reacts with OH	van Zelm et al. (2007). https://doi.org/10.1016/j.atmosenv.2007.09.072
photochemical oxidant formation, human health	Environmental	Photochemical Ozone Formation
photochemical oxidant formation, ecosystems	Environmental	Photochemical Ozone Formation
Photochemical oxidation potential (PCO)	Environmental	Photochemical Ozone Formation
Water depletion potential (m3eq)	Environmental	Resources	Water	LCA midpoint impact	Freshwater scarcity characterised via scarcity-adjusted amount of water used from Swiss Ecoscarcity 2006	Frischknecht et al. (2006). Swiss Ecological Scarcity Method: The New Version 2006
Water consumption potential (m3eq)	Environmental	Resources	Water	LCA midpoint impact
Land occupation (m2a crop eq)	Environmental	Resources	Land	LCA midpoint impact	Occupation and time integrated transformation	ReCipe impact method. ReCiPe 2016 A harmonized life cycle impact assessment method at midpoint and endpoint level Report I: Characterization_x000D_Available at https://www.rivm.nl/bibliotheek/rapporten/2016-0104.pdf
Land use (kg C deficit)	Environmental	Resources	Land	LCA midpoint impact	Measure of the loss of land quality due to land transformation.	Soil Organic Matter model. Milà et al., 2007. https://doi.org/10.1065/lca2006.05.250
Land requirements	Environmental	Resources	Land	Impact (no LCA)
Land use (not specified)	Environmental	Resources	Land	LCA midpoint impact	The proposer of the framework recommends to account for this category and suggests some possible methods/metrics without expressing a clear preference.	Soil Organic Matter model by Milà et al. (2007) https://doi.org/10.1065/lca2006.05.250 LANCA® model by by Beck et al. (2010). LANCA®. Land Use Indicator Value Calculation in Life Cycle Assessment. Fraunhofer Verlag, Stuttgart.ReCipe impact model. ReCiPe 2016 A harmonized life cycle impact assessment method at midpoint and endpoint level Report I: CharacterizationAvailable at https://www.rivm.nl/b…
Land Usage (M ha)	Environmental	Resources	Land	Impact (no LCA)
Fossil resource scarcity (kg oil eq)	Environmental	Resources	Fossils and minerals	LCA midpoint impact	Depletion of fossil resources	ReCipe impact method. ReCiPe 2016 A harmonized life cycle impact assessment method at midpoint and endpoint level Report I: Characterization_x000D_Available at https://www.rivm.nl/bibliotheek/rapporten/2016-0104.pdf
Mineral resources scarcity (kg Cu eq)	Environmental	Resources	Fossils and minerals	LCA midpoint impact	Depletion of mineral resources	ReCipe impact method. ReCiPe 2016 A harmonized life cycle impact assessment method at midpoint and endpoint level Report I: Characterization_x000D_Available at https://www.rivm.nl/bibliotheek/rapporten/2016-0104.pdf
Resource depletion potential (kg Sb eq)	Environmental	Resources	Fossils and minerals	LCA midpoint impact	Depletion of resources based on the scarcity model by Van Oers et al.	Van Oers et al. (2002). Abiotic Resource Depletion in LCA. Available online: https://www.leidenuniv.nl/cml/ssp/projects/lca2/report_abiotic_depletion_web.pdf
Eco-indicator99 depletion of resources [-]	Environmental	Resources	Fossils and minerals	LCA endpoint impact	Life cycle impact in the damage category "resources".	Goedkoop et al., 2009. https://doi.org/10.029/2003JD004283
Resources depletion ($)	Environmental	Resources	Fossils and minerals	LCA endpoint impact	Life cycle impact in the damage category "resources".	ReCipe impact method. ReCiPe 2016 A harmonized life cycle impact assessment method at midpoint and endpoint level Report I: Characterization_x000D_Available at https://www.rivm.nl/bibliotheek/rapporten/2016-0104.pdf
Limiting depletion of fossil/mineral resources (conceptual)	Environmental	Resources	Fossils and minerals	Impact (no LCA)	The proposer of the framework remarks the importance to keep into account this aspect but does not suggest or recommend any specific methods/metrics.	[-]
Resource use/depletion - fossil (MJ)	Environmental	Resources	Fossils and minerals	LCA midpoint impact	Depletion of fossil resources based on the scarcity model by Van Oers et al.	Van Oers et al. (2002). Abiotic Resource Depletion in LCA. Available online: https://www.leidenuniv.nl/cml/ssp/projects/lca2/report_abiotic_depletion_web.pdf
Metal Depletion (recipe)	Environmental	Resources	Fossils and minerals	LCA midpoint impact
Damage to Resources (Recipe)	Environmental	Resources	Fossils and minerals	LCA endpoint impact
Biodiversity protection (conceptual)	Environmental	Integrated Assessment	Biodiversity loss	Impact (no LCA)	The proposer of the framework remarks the importance to keep into account this aspect but does not suggest or recommend any specific methods/metrics.	[-]
Ecosystems damage (conceptual)	Environmental	Integrated Assessment	Biodiversity loss	Impact (no LCA)	The proposer of the framework remarks the importance to keep into account this aspect but does not suggest or recommend any specific methods/metrics.	[-]
Ecosystems (species.yr)	Environmental	Integrated Assessment	Biodiversity loss	LCA endpoint impact	Life cycle impact in the damage category "ecosystems quality".	ReCipe impact method. ReCiPe 2016 A harmonized life cycle impact assessment method at midpoint and endpoint level Report I: Characterization_x000D_Available at https://www.rivm.nl/bibliotheek/rapporten/2016-0104.pdf
Eco-indicator99 ecosystems quality [-]	Environmental	Integrated Assessment	Biodiversity loss	LCA endpoint impact	Life cycle impact proceeding from the identification of areas of concern (damage categories) to determination of what causes damage to these. This indicator is for the damage category regarding ecosystem quality.	Goedkoop et al., 2009. https://doi.org/10.029/2003JD004283
embodied biodiversity footprints	Environmental	Integrated Assessment	Biodiversity loss	Impact (no LCA)
Ecosystem quality (recipe)	Environmental	Integrated Assessment	Biodiversity loss	LCA endpoint impact
Eco-indicator 99 total [-]	Environmental	Integrated Assessment	Single score	LCA endpoint impact	Life cycle impact proceeding from the identification of areas of concern (damage categories) to determination of what causes damage to these. three damage cat_x0002_egories: human health, ecosystem quality and resources.	Goedkoop et al., 2009. https://doi.org/10.029/2003JD004283
Human Health (DALY)	Environmental	Integrated Assessment	Human health	LCA endpoint impact	Life cycle impact in the damage category "human health".	ReCipe impact method. ReCiPe 2016 A harmonized life cycle impact assessment method at midpoint and endpoint level Report I: CharacterizationAvailable at https://www.rivm.nl/bibliotheek/rapporten/2016-0104.pdf Fantke et al. 2020 http://dx.doi.org/10.1039/d0gc01544j and Tian et al. 2021 https://doi.org/10.1016/j.scitotenv.2021.145049
Human health(recipe)	Environmental	Integrated Assessment	Human health	LCA endpoint impact
Eco-Indicator99 Human health (DALY)	Environmental	Integrated Assessment	Human health	LCA endpoint impact
Eco-Indicator99 Human health (DALY)	Environmental	Integrated Assessment	Human health	LCA endpoint impact	life cycle impact in the damage category "human health".	Goedkoop et al., 2009. https://doi.org/10.029/2003JD004283
Air pollution (DALYs) - airpollution and acidification	Environmental	Integrated Assessment	Human health	Impact (no LCA)
smog potential (Kg Nox eq)	Environmental	Integrated Assessment	Human health	Impact (no LCA)
Indoor air quality	Environmental	Integrated Assessment	Human health	Impact (no LCA)
LCT human toxicity (mg intake)	Environmental	Integrated Assessment	Human health	Impact (no LCA)
Respiratory inorganics	Environmental	Integrated Assessment	Human health	Impact (no LCA)
Oral toxicity (-logLD50)	Environmental	Integrated Assessment	Human health	Impact (no LCA)
Influence/Impact on public health	Environmental	Integrated Assessment	Human health	Impact (no LCA)
Inherent safety indicator	Environmental	Integrated Assessment	Human health	Impact (no LCA)
Chemicals safety	Environmental	Integrated Assessment	Human health	Impact (no LCA)
DALY due to air and water pollution	Environmental	Integrated Assessment	Human health	Impact (no LCA)
Supply chain responsibility score	Social	value chain actors		Other	Score representing responsibility on the supply chain	Method to calculate the score illustrated in the Germany's central environmental authority
Tracking capacity	Social	value chain actors		Other	How much the company can trace its suppliers	Monitoring
Regional materials	Social	value chain actors		Other
promoting social responsibility	Social	value chain actors		Social LCA subcategory	This subcategory seeks to assess whether the enterprise promotes social responsibility among its suppliers and through its own actions. This measure considers whether the enterprise manages its suppliers in a socially responsible way, including monitoring, auditing, and training efforts. This subcategory also examines whether enterprises take corrective action towards suppliers when warranted.	UNEP. (2021). Methodological Sheets for Subcategories in Social Life Cycle Assessment (S-LCA)
Fair competition	Social	value chain actors		Social LCA subcategory	This subcategory assesses if the organization’s competitive activities are conducted in a fair way and in com_x0002_pliance with legislations preventing anti-competitive behavior, anti-trust, or monopoly practices	UNEP. (2021). Methodological Sheets for Subcategories in Social Life Cycle Assessment (S-LCA)
skilled workforce availability	Social	value chain actors
Consumer health & safety	Social	consumer		Social LCA subcategory	This subcategory helps to identify the existence and scope of systematic efforts to address consumer health and safety across the organizations involved in the life cycle of a product and/ or service.	UNEP. (2021). Methodological Sheets for Subcategories in Social Life Cycle Assessment (S-LCA)
Impact on basic needs of customers	Social	consumer		Other	Direct impact on baisc needs (healthcare, clean water, healthy food, shelter, education)	Measurement
Content of natural substances (%)	Social	consumer		Other	Percentage of content of nature-identical substances or water or substances from controlled organic farming	Measurement
Ethics in marketing communication	Social	consumer		Other	Avoidance of misleading or dangerous marketing practices	Monitoring
Brand communication	Social	consumer
Consumer acceptance	Social	consumer
Noise reduction	Social	workers		Other	Actions for reducing the exposure of employees and local community to the noise generated by the activites performed by the company	Measurement
Respect for the national standards for security and social responsibility	Social	workers		Other	Respect for worker safety and social responsibility standards in the countries of operation	Monitoring
Time of exposure	Social	workers		Other	Time of exposure to a certain emission or toxic substance	Measurement
Workers health & safety	Social	workers		Social LCA subcategory	This subcategory aims to assess both the rate of incidents and the status of prevention measures and mana_x0002_gement practices. An incident is defined as a work-related event in which an injury or ill health (regardless of severity) or fatality occurred or could have occurred.	UNEP. (2021). Methodological Sheets for Subcategories in Social Life Cycle Assessment (S-LCA)
Equipment failure rate	Social	workers		Other	Average number of times that the equipment fails and needs maintenance (the increase of this rate is directly linked with how old the equipment is)	Measurement
Rate of injuries	Social	workers		Accontancy	Number of injuries per year per employee	Monitoring
Equal opportunities and discrimination	Social	workers		Social LCA subcategory	The subcategory aims to assess equal opportunity management practices and the presence of discrimination in the opportunities offered to the workers by the organizations and in the working conditions	UNEP. (2021). Methodological Sheets for Subcategories in Social Life Cycle Assessment (S-LCA)
Age	Social	workers		Other	Average age of employees to prevent older employees to work on heavy jobs and children to work	Monitoring
Disability	Social	workers		Other	Facilitate the employment of people with disability	Monitoring
Child labour	Social	workers		Social LCA subcategory	he assessment aims to verify if the organization might or is employing children (as defined in the ILO conven_x0002_tions) and to identify the nature of any child labor. It will be looked upon, if the conditions are favorable for the occurrence of child labor, and the existence and quality of prevention and mitigating measures taken by the organization.	UNEP. (2021). Methodological Sheets for Subcategories in Social Life Cycle Assessment (S-LCA)
Forced labour	Social	workers		Social LCA subcategory	The assessment aims to verify that forced or compulsory labor is not used in the organization.	UNEP. (2021). Methodological Sheets for Subcategories in Social Life Cycle Assessment (S-LCA)
Sexual harassment	Social	workers		Social LCA subcategory	This impact category assesses whether an organization might create or tolerate working conditions in which sexual harassment occurs, and to what extent company actions are successful in preventing sexual harass_x0002_ment. While circumstantial indicators may be measured through audits with yes/no results (e.g., the existence of a grievance helpline), direct occurrences of sexual harassment might …	UNEP. (2021). Methodological Sheets for Subcategories in Social Life Cycle Assessment (S-LCA)
Freedom of association and collective bargaining	Social	workers		Social LCA subcategory	The assessment aims to verify the compliance of the organization with freedom of association and collec_x0002_tive bargaining standards. In particular 1) whether the workers are free to form and join association(s) of their choosing even when it could damage the economic interest of the organization, 2) whether the workers have the right to organize unions, to engage in collective bargaining, and…	UNEP. (2021). Methodological Sheets for Subcategories in Social Life Cycle Assessment (S-LCA)
Annual job trainings	Social	workers		Other	Number of job trainings made by the employees	Monitoring
Part time work	Social	workers		Other	Possibility to work part time	Monitoring
Fair salary	Social	workers		Social LCA subcategory	This subcategory aims to assess whether practices concerning wages are in compliance with established standards and if the wage provided is meeting legal requirements, whether it is above, meeting, or below indus_x0002_try average and whether it can be considered as a living wag	UNEP. (2021). Methodological Sheets for Subcategories in Social Life Cycle Assessment (S-LCA)
Working conditions (LCA impact category)	Social	workers		Social LCA impact category (2009)	Social LCA characterised impact concerning activities like violation of fundamental labour rights (e.g. working time, disciplinary actions and wage payment and health and safety of employees)	UNEP/SETAC Life Cycle Initiative. (2009). Guidelines for Social Life Cycle Assessment of Products.
Working hours	Social	workers		Social LCA subcategory	The assessment aims to verify if the number of hours effectively worked is in accordance with the ILO stan_x0002_dards and when overtime occurs, compensation in terms of money or free time is planned and provided to the workers.	UNEP. (2021). Methodological Sheets for Subcategories in Social Life Cycle Assessment (S-LCA)
Labour influence	Social	workers
Gender wage gap	Social	workers		PSILCA indicator	Gender wage gap describes the difference between median earnings of men and women relative to median earnings of men if wages of men are higher. Otherwise, it is the difference between median earnings of men and women relative to median earnings of women	Maister, K., Di Noi, C., Ciroth, A., & Srocka, M. (2020). PSILCA database v.3 documentation.
Evidence of violations of laws and employment regulations	Social	workers		PSILCA indicator	Violations of employment regulations, by the employer, are one threat to employees’ well-being and therefore a potential social impact. Information about these violations is taken from a public source in the United States – U.S. Department of Labor (USDOL 2015b).	Maister, K., Di Noi, C., Ciroth, A., & Srocka, M. (2020). PSILCA database v.3 documentation.
Weekly hours of work per employee	Social	workers		PSILCA indicator	It includes: (a) ‘direct hours’ or the time spent carrying out the tasks and duties of a job, (b) ‘related hours’, or the time spent maintaining, facilitating or enhancing productive activities (c) ‘down time’, or time when a person in a job cannot work due to machinery or process breakdown, accident, lack of supplies or power or Internet access and (d) ‘resting time’, or time spent in short peri…	Maister, K., Di Noi, C., Ciroth, A., & Srocka, M. (2020). PSILCA database v.3 documentation.
women in the sectoral labour force	Social	workers		PSILCA indicator	Women in the sectoral labour force” serves as an indication for structural discrimination of women, i.e. the systemic and institutionalized disadvantage faced by women regarding their participation in economic life	Maister, K., Di Noi, C., Ciroth, A., & Srocka, M. (2020). PSILCA database v.3 documentation.
men in the sectoral labour force	Social	workers		PSILCA indicator	This indicator aims to complete the assessment of gender discrimination. Unequal employment opportunities (with negative effects) can also be faced by men, e.g. in the health or education sectors.	Maister, K., Di Noi, C., Ciroth, A., & Srocka, M. (2020). PSILCA database v.3 documentation.
trade unionism	Social	workers		PSILCA indicator	This indicator serves to assess how liberal and vivid trade union culture is, and, in the end, to what degree the right to organize freely is assured in different sectors	Maister, K., Di Noi, C., Ciroth, A., & Srocka, M. (2020). PSILCA database v.3 documentation.
Social security, expenditure	Social	workers		PSILCA indicator	The ILO convention No. 102 identifies nine main social security branches, which are Medical Care, Sickness Benefit, Maternity Benefit, Old-age Benefit, Invalidity Benefit, Survivors’ Benefit, Family Benefit, Employment Injury Benefit and Unemployment Benefit (ILO 1952). The extent of (public) social security expenditures depends on political decisions and tax regulations.	Maister, K., Di Noi, C., Ciroth, A., & Srocka, M. (2020). PSILCA database v.3 documentation.
Presence of sufficient safety measures	Social	workers		PSILCA indicator	Occupational health and safety depends, on the one hand, on the hazards and risks that workers are directly exposed to in their working environment. On the other hand, these occupational health risks can be limited by appropriate measures taken by the employer. This is assessed by the indicator “Presence of sufficient safety measures”	Maister, K., Di Noi, C., Ciroth, A., & Srocka, M. (2020). PSILCA database v.3 documentation.
workers affected by natural disasters	Social	workers		PSILCA indicator	The idea of this indicator is to verify whether workers in specific countries or industries are at higher risk to fall victim to natural disasters than others. Natural disasters can be classified as hazards of the atmosphere and hydrosphere (as storms, floods, droughts), of the lithosphere (as volcanic eruptions, earthquakes) and of the biosphere (as forest fires or epidemics)	Maister, K., Di Noi, C., Ciroth, A., & Srocka, M. (2020). PSILCA database v.3 documentation.
Accident rates at workplace	Social	workers		PSILCA indicator	Accident rates are the main indicator to reflect the state of safety conditions at a specific workplace or in a specific industry. While occupational non-fatal accidents cause injuries not leading to death, fatal accidents refer to those incidents “where death occurred within one year of the day of the accident” (ILO 2017).	Maister, K., Di Noi, C., Ciroth, A., & Srocka, M. (2020). PSILCA database v.3 documentation.
Working hours (e.g. maximum)/work-file balance	Social	workers		Accontancy	Number of hours worked by each employee	Monitoring
association and bargaining rights	Social	workers
trafficking in person	Social	workers		PSILCA indicator	“The Palermo Protocol defines trafficking in persons as the recruitment, transportation, harbouring or receipt of persons, by means of coercion, abduction, deception or abuse of power or of vulnerability, for the purpose of exploitation. It goes on to specify that exploitation shall, at a minimum, include sexual exploitation, forced labour, slavery and slavery-like practices.”	Maister, K., Di Noi, C., Ciroth, A., & Srocka, M. (2020). PSILCA database v.3 documentation.
Working conditions (LCA impact category)	Social	workers		Social LCA impact	Social LCA characterised impact concerning activities like violation of fundamental labour rights (e.g. working time, disciplinary actions and wage payment and health and safety of employees)	Dreyer et al., 2010. https://doi.org/10.1007/s11367-009-0148-7
Impact in local economy	Social	local community
Cultural heritage	Social	local community		Social LCA subcategory	This subcategory assesses whether an organization respects local cultural heritage and recognizes that all community members have a right to pursue their cultural development.	UNEP. (2021). Methodological Sheets for Subcategories in Social Life Cycle Assessment (S-LCA)
Human Satisfaction (appropriateness for culture and level of noise and vibration)	Social	local community
Community acceptance	Social	local community
certified environmental management system	Social	local community		PSILCA indicator	This indicator assesses the number of certified environmental management systems (EMS) per sector, in relation to the number of employees in the same sector. Idea is to take the existence of certified EMS as a proxy for the commitment of companies in a sector to environmental protection.	Maister, K., Di Noi, C., Ciroth, A., & Srocka, M. (2020). PSILCA database v.3 documentation.
Pollution level of the country	Social	local community		PSILCA indicator	This indicator assesses the overall level of pollution in a country in order to describe the situation in that a company or industry is operating. Hence, it provides information about the importance of clean economic activities and compensation efforts	Maister, K., Di Noi, C., Ciroth, A., & Srocka, M. (2020). PSILCA database v.3 documentation.
Extraction of material resources	Social	local community		PSILCA indicator	Besides water, there are other material resources directly or indirectly important for local communities and organizations, mainly fossil fuels, biomass, ores and minerals. They play a vital role because they can be communities’ base of life and economy. Consequently, the exploitation and destruction of natural resources can cause resettlements, poverty, cultural uprooting and, in the end, confli…	Maister, K., Di Noi, C., Ciroth, A., & Srocka, M. (2020). PSILCA database v.3 documentation.
sanitation coverage	Social	local community		PSILCA indicator	Populations with lower sanitation coverage are exposed to a higher risk of infectious diseases and epidemics. Assuming that low access to improved and safely managed sanitation facilities is accompanied by lower water treatment rates, the indicator also provides information about general water quality (e.g. because wastewater might be piped directly into rivers). T	Maister, K., Di Noi, C., Ciroth, A., & Srocka, M. (2020). PSILCA database v.3 documentation.
drinking water coverage	Social	local community		PSILCA indicator	This indicator serves to assess the availability and accessibility of uncontaminated water for domestic use. Data for drinking water coverage is based on information about the share of population with access to a safely managed improved water source	Maister, K., Di Noi, C., Ciroth, A., & Srocka, M. (2020). PSILCA database v.3 documentation.
Level of industrial water use	Social	local community		PSILCA indicator	The level of industrial water use is the quantity of freshwater, desalinated water and treated wastewater withdrawn for industrial purposes related to total water withdrawal (for agricultural, industrial and municipal use) and to total actual renewable water resource	Maister, K., Di Noi, C., Ciroth, A., & Srocka, M. (2020). PSILCA database v.3 documentation.
Respect of indigenous rights	Social	local community		Social LCA subcategory	This subcategory assesses organizational respect for the rights of indigenous peoples, as a group or as indi_x0002_viduals	Maister, K., Di Noi, C., Ciroth, A., & Srocka, M. (2020). PSILCA database v.3 documentation.
international migrant stock	Social	local community		PSILCA indicator	International migrant stock is the number of people born in a country other than that in which they live in relation to the population. It also includes refugees	Maister, K., Di Noi, C., Ciroth, A., & Srocka, M. (2020). PSILCA database v.3 documentation.
Net migration rate	Social	local community		PSILCA indicator	Net migration rate compares the difference between the number of persons entering and leaving a country during the year per 1,000 persons (based on midyear population)	Maister, K., Di Noi, C., Ciroth, A., & Srocka, M. (2020). PSILCA database v.3 documentation.
Embodied forest area footprints	Social	local community		PSILCA indicator	The embodied forest area footprint indicates the ratio between hectares of affected forest land in relation to 1 dollar of product output	Maister, K., Di Noi, C., Ciroth, A., & Srocka, M. (2020). PSILCA database v.3 documentation.
Emodied agricultural area footprints	Social	local community		PSILCA indicator	The embodied agricultural area footprint indicates the ratio between hectares of affected agricultural land in relation to 1 dollar of product output	Maister, K., Di Noi, C., Ciroth, A., & Srocka, M. (2020). PSILCA database v.3 documentation.
Unemployment rate	Social	local community		PSILCA indicator	The unemployment rate is the number of persons who are unemployed as a percent of the total number of employed and unemployed persons (i.e., the labour force).	Maister, K., Di Noi, C., Ciroth, A., & Srocka, M. (2020). PSILCA database v.3 documentation.
International migrant workers in the sector	Social	local community		PSILCA indicator	The indicator provides information on the share of international migrant workers of the total employed population. It can be seen as an indication for potential conflicts (e.g. religious, racial, or discrimination related).	Maister, K., Di Noi, C., Ciroth, A., & Srocka, M. (2020). PSILCA database v.3 documentation.
Access to basic needs	Social	local community		Other	Acess to basic needs for human right dignity (healthcare, clean water & sanitation, healthy food, shelter)	Measurement
Human rights (conceptual)	Social	local community		Other	The proposer of the framework remarks the importance to keep into account this aspect but does not suggest or recommend any specific methods/metrics.	[-]
Human rights (LCA impact category)	Social	local community		Social LCA impact category (2009)	Social LCA characterised impact concerning activities that might affect negatively human dignity and well-being	UNEP/SETAC Life Cycle Initiative. (2009). Guidelines for Social Life Cycle Assessment of Products.
Local employment	Social	local community		Social LCA subcategory	Local hiring preferences provide important income and training opportunities to community members. Orga_x0002_nizations that develop relationships with locally-based suppliers will further encourage local employment and development. This subcategory assesses the role of an organization in directly or indirectly affecting local employment.	UNEP. (2021). Methodological Sheets for Subcategories in Social Life Cycle Assessment (S-LCA)
Respect of the living condition	Social	local community
Public Welfare and Safety	Social	local community
Health expenditure	Social	society		PSILCA indicator	Health expenditure is one of the key indicators to assess the health systems of countries which in turn are essential to combat disease and improve the health of populations (see World Bank 2014d). Health systems are defined as “the combined arrangements of institutions and actions whose primary purpose is to promote, restore, or maintain health” (WHO 2000 cited in World Bank 2014d). Effective he…	Maister, K., Di Noi, C., Ciroth, A., & Srocka, M. (2020). PSILCA database v.3 documentation.
Illiteracy rate	Social	society		PSILCA indicator	Generally speaking, illiteracy is the incapacity of a person to read or write properly. It is mainly distinguished between (primary) illiteracy – meaning that a person has never learned to read and write – and functional illiteracy occurring when a person´s reading and writing skills are insufficient to use them naturally and appropriately in daily social life	Maister, K., Di Noi, C., Ciroth, A., & Srocka, M. (2020). PSILCA database v.3 documentation.
value added	Social	society
life expectancy at birth	Social	society		PSILCA indicator	This indicator is useful to reveal critical living conditions in different countries. It can further be an indication of a good/ bad national health system. A definition of “Life expectancy at birth” is provided by World Bank (2017): “Life expectancy at birth indicates the number of years a newborn infant would live if prevailing patterns of mortality at the time of its birth were to stay the sam…	Maister, K., Di Noi, C., Ciroth, A., & Srocka, M. (2020). PSILCA database v.3 documentation.
Public expenditure on education	Social	society		PSILCA indicator	This indicator is expressed as percentage of GDP. It is defined as follows: „Total general (local, regional and central) government expenditure on education (current, capital, and transfers), expressed as a percentage of GDP. It includes expenditure funded by transfers from international sources to government.” (UNESCO Institute for Statistics (UIS) 2017)	Maister, K., Di Noi, C., Ciroth, A., & Srocka, M. (2020). PSILCA database v.3 documentation.
Risk of conflicts	Social	society		PSILCA indicator	The indicator represents overall level of three thematic groups, namely the level of Societal Safety and Security; the extent of Ongoing Domestic and International Conflict; and the degree of Militarisation (IEP, 2018). All the groups are combined in a single Global Peace Index (GPI). The higher the GPI the more likely social risks would increase.	Maister, K., Di Noi, C., Ciroth, A., & Srocka, M. (2020). PSILCA database v.3 documentation.
Contribution to economic development	Social	society		Social LCA subcategory	This subcategory assesses to what extent the organization/product or service contributes to the economic development of the society. It can be measured at different geographical levels. It is important in the assess_x0002_ment to avoid double counting with the social impacts related to the local community	UNEP. (2021). Methodological Sheets for Subcategories in Social Life Cycle Assessment (S-LCA)
Youth illiteracy	Social	society		PSILCA indicator	Illiteracy is the incapacity of a person to read or write properly. It is mainly distinguished between (primary) illiteracy – meaning that a person has never learned to read and write – and functional illiteracy occurring when a person´s reading and writing skills are insufficient to use them naturally and appropriately in daily social life. Youth illiteracy refers to people aged 15 to 24 years.	Maister, K., Di Noi, C., Ciroth, A., & Srocka, M. (2020). PSILCA database v.3 documentation.
Active involvement of enterprises in corruption and bribery	Social	society		PSILCA indicator	OECD considers corruption and bribery a serious problem that has to be criminalised and combated (see ibid.). To this end, this indicator shall assess the degree of an active involvement of companies in corruption and bribery along their supply chains	Maister, K., Di Noi, C., Ciroth, A., & Srocka, M. (2020). PSILCA database v.3 documentation.
Corruption prevention initiatives	Social	society		Other	Avoidance of corruption practices and monitor of suppliers' avoidance of corruption practices	Monitoring
Life expectancy at birth	Social	society		PSILCA indicator	This indicator is useful to reveal critical living conditions in different countries. It can further be an indication of a good/ bad national health system. A definition of “Life expectancy at birth” is provided by World Bank (2017): “Life expectancy at birth indicates the number of years a newborn infant would live if prevailing patterns of mortality at the time of its birth were to stay the sam…	Maister, K., Di Noi, C., Ciroth, A., & Srocka, M. (2020). PSILCA database v.3 documentation.
Poverty alleviation	Social	society		Social LCA subcategory	The aim of the assessment is measuring the presence or not of proactive activities, such as strategies, action plans, investment, to reduce the poverty of the society at different geographical level made by the organization itself or linked with the product life cycle.	UNEP. (2021). Methodological Sheets for Subcategories in Social Life Cycle Assessment (S-LCA)
Public sector corruption	Social	society		PSILCA indicator	In general, corruption is “the abuse of entrusted power for private gain” (Transparency International 2015). Public sector corruption is measured by the Corruption Perceptions Index (Transparency International 2012).	Maister, K., Di Noi, C., Ciroth, A., & Srocka, M. (2020). PSILCA database v.3 documentation.
youth illiteracy	Social	society
(Total) production cost (€)	Economic	Internal cost		Inventory indicator	The total cost of production including both fixed and variable costs.	Well established parameter in economic assessments. Formula/method reported e.g. by Al Ghatta et al. 2021 https://doi.org/10.1039/d0gc03991h
Product cost	Economic	Internal cost		Inventory indicator
Cost of maintenance/repairs	Economic	Internal cost		Inventory indicator
Total Annual Cost (TAC)	Economic	Internal cost
SSbD implementation costs	Economic	Internal cost
Externality cost (€)	Economic	External cost		Inventory indicator	This refers to the costs associated with environmental emissions, worker safety, and health protection, and land eco-remediation	Kharat et al. 2019. https://doi.org/10.1016/j.techsoc.2018.12.005
Life cycle cost	Economic	External cost		Inventory indicator	The total cost over the life cycle. It can have only producer perspective or include societal and/or environmental cost.	Life cycle cost (LCC) is an approach that assesses the total cost of an asset over its life cycle including initial capital costs, maintenance costs, operating costs and the asset's residual value at the end of its life. Kambanou et al. 2016. https://doi.org/10.1016/j.procir.2016.03.054
Waste (incl. emissions)/recycling treatment cost	Economic	External cost		Inventory indicator	Cost of waste treatment (e.g. cost of recycling a solvent or treating the emissions that would be released to air)
Added value (€)	Economic	Profitability		Inventory indicators	The added value VA corresponds to the difference between product value and raw material costs.	Well established parameter in economic assessments. Formula/method reported e.g. by Rincon et al., 2020 https://doi.org/10.1016/B978-0-12-818376-2.00001-6
Financial profit (€)	Economic	Profitability		Inventory indicator	Profits earned commercializing products	Well established parameter in economic assessments. Formula/method reported e.g. by Smith et al. 2015. https://doi.org/10.1016/j.compchemeng.2015.04.020
Minimum selling price	Economic	Profitability		Inventory indicator	Minimum price of the product at which the cost and benefits break even, leading to a net-zero present value.	Well established parameter in economic assessments. Formula/method reported e.g. by Al Ghatta et al. 2021 https://doi.org/10.1039/d0gc03991h
Net present value (€)	Economic	Profitability		Inventory indicator	Difference between the present value of cash inflows and the present value of cash outflows over a period of time.	Well established parameter in economic assessments. Formula/method reported e.g. by Smith et al. 2015. https://doi.org/10.1016/j.compchemeng.2015.04.020
Normalised added value [-]	Economic	Profitability		Inventory indicator
Payback period (y)	Economic	Profitability		Inventory indicator	Amount of time it takes to recover the cost of an investment	Well established parameter in economic assessments. Formula/method reported e.g. by Smith et al. 2015. https://doi.org/10.1016/j.compchemeng.2015.04.021
Profitability (conceptual)	Economic	Profitability		Impact category	The proposer of the framework remarks the importance to keep into account this aspect but does not suggest or recommend any specific methods/metrics.
Yield	Economic	Profitability		Inventory indicator
Total Capital Investment	Economic	Profitability
Purchase cost	Economic	Internal cost		Inventory indicator
Product performance	Economic	value chain actors
Stakeholders requirements	Economic	value chain actors
Transparency and information	Economic	value chain actors		Impact category
Value chain collaboration	Economic	value chain actors		Impact category
Willingness to pay	Economic	value chain actors
Additional income (incentives, flexibility, additional area)	Economic	Other
Affordability	Economic	Other		impact category
Breakeven point	Economic	Other
Comfort of occupants	Economic	Other
Costumer acceptance and satisfaction	Economic	Other		impact category
discounted cash flow rate of return	Economic	Other
feedstock price	Economic	Other		Inventory indicator
Flash point	Economic	Other
Initial and mantainance budget	Economic	Other
Innovation potential (by number of publications)	Economic	Other
Market acceptance	Economic	Other		Impact category
Non-construction cost (tax, finantial cost)	Economic	Other		Inventory indicator
Performance uncertainty (material never used in a context)	Economic	Other		Impact category
Point of explosion	Economic	Other
Predictability	Economic	Other
Process cost	Economic	Other		Inventory indicator
Projected price	Economic	Other
Reaction and resistance to fire	Economic	Other
Scalability	Economic	Other
TCC (Total Capital Cost)	Economic	Other			TCC was chosen to reflect investment intensity. It includes capital cost (CAPEX) for each piece of equipment calculated
TPC (Total Production Cost)	Economic	Other			TPC represents complex economic criterion assessing total production expenses related to the product/process/material/chemical
Waste management cost	Economic	Other		Impact category

## Sheet: onky internal for check
Ref	Applied to early stage design	Dimensions covered
Stefanis et al1996	1	ENV+SAF				Row Labels	Count of Ref
Pistikopoulos and Stefanis1998	1	ENV+SAF				ECO	0.0128205
Jiménez-Gonzalez et al2004	1	ENV+SAF				0	0.0128205
Gani et al2005	1	SAF				ENV	0.108974
Rossi et al2006	1	ENV+SAF+SOC+ECO				0	0.0769231
Capello et al2007	1	SAF				1	0.0320513
Curzons et al2007	1	ENV+SAF				ENV+ECO	0.0961538
Kicherer et al2007	0	ENV+SAF+ECO				0	0.0320513
Narayanam et al2007	1	ENV+ECO				1	0.0641026
Xu and Diwekar2007	0	SAF+ECO				ENV+SAF	0.147436
Alfonsi et al2008	1	SAF				0	0.0576923
EU Green public procurement (COM 2008/400)2008	0	SAF+ECO				1	0.0897436
Halim and Srinivasan2008	1	ENV				ENV+SAF+ECO	0.198718
Reinhardt et al2008	0	SAF+ECO				0	0.115385
Sugiyama et al2008	1	SAF+ECO				1	0.0833333
Andraos2009	0	SAF+ECO				ENV+SAF+SOC	0.0897436
Dinh et al2009	0	ENV+SAF				0	0.0769231
Ecodesign Directive (Directive 2009/125/EC)2009	0	SAF				1	0.0128205
Energy Label Directive (2010/30/EU – revised EU 2017/1369)2010	0	ENV+SAF				ENV+SAF+SOC+ECO	0.128205
EU Ecolabel (EU 2010/66)2010	0	ENV+SAF+SOC				0	0.0961538
Brignon2011	0	ECO				1	0.0320513
GRS2011	0	SAF+SOC				ENV+SOC	0.0192308
Henderson et al2011	1	ENV+SAF				0	0.0192308
Li et al2011	1	SAF+ECO				ENV+SOC+ECO	0.00641026
Cervera-Padrell et al2012	0	SAF+ECO				0	0.00641026
MTS 2012	0	ENV+SAF				SAF	0.0576923
Rossi2012	0	ENV+ECO				0	0.025641
Malloy et al2013	1	ENV+SAF+ECO				1	0.0320513
Patel et al2013	1	ENV+SAF+ECO				SAF+ECO	0.0961538
Posada et al2013	1	ENV+SAF+ECO				0	0.0641026
Prat et al2013	1	SAF				1	0.0320513
Aktar et al2014	0	ENV+SAF+ECO				SAF+SOC	0.0384615
NRC 2014	0	ENV+SOC				0	0.0384615
Sell et al2014	1	ENV+ECO				Grand Total	1
Ahmad et al2015	1	SAF+ECO
Boyes et al2015	0	ENV
Martínez-Gallegos et al2015	1	ENV+SAF+ECO
Prat et al2015	1	ENV+SAF+ECO
Saavalainen et al2015	1	ENV+SAF+SOC+ECO
Samani et al2015	1	ENV+ECO
Smith et al2015	1	ENV+SAF+ECO
The F-Gas Regulation2015	0	ENV
Arora et al2016	1	ENV+ECO
Asadi et al2016	0	ENV+SAF+ECO
Fantke et al2016	0	ENV
Isoni et al2016	0	ENV+SAF+ECO
Jayakrishna et al2016	0	ENV
Jia et al2016	0	ENV+ECO
Limleamthong et al2016	0	ENV
Martin2016	0	ENV+ECO
Moralles at al2016	0	ENV+SAF
Piccino et al2016	1	ENV+SAF+ECO
Simanovska et al2016	1	ENV+SAF
UBA2016	0	ENV+SAF+SOC+ECO
IC22017	0	ENV+SAF+SOC+ECO
Jolliffe and Gerogiorgis2017	1	SAF+ECO
Moretti et al2017	0	ENV+SAF+ECO
Natureplus2017	0	ENV+SAF+SOC
Nkambule and Blignaut 2017	0	ENV+SAF+SOC+ECO
Xu et al2017	0	ENV+SAF+SOC+ECO
Zhong et al2017	0	ENV+SAF+SOC+ECO
Acar et al2018	0	ENV+SAF+SOC
BASF2018	0	ENV+SAF+SOC+ECO
Cignitti et al2018	1	ENV+SAF
Gonzalez-Garay and Guillen-Gosalbez2018	1	ENV+ECO
IEEE2018	0	ENV+SAF+SOC
Ma et al2018	0	SAF
OECD2018	0	ENV+SAF
Ooi et al2018	1	ENV+SAF+ECO
Pinheiro et al2018	0	ENV+SAF+ECO
Reddy et al2018	0	ENV+SAF+SOC+ECO
Vinodh2018	1	ENV+SAF
WBCSD2018	0	ENV+SAF+SOC+ECO
Ahmed et al2019	0	ENV+SAF+SOC+ECO
AISE 2019	0	ENV+SAF+SOC
Barbosa et al2019	0	SAF+ECO
Bystrzanowska et al2019	0	ENV
Calvo-Serrano 2019	1	ENV+SAF
Falqui et al2019	0	ENV+SAF+SOC+ECO
GEC2019	0	ENV+SAF+ECO
Gonzalez et al2019	1	SAF
Kokosa2019	0	SAF+ECO
Oguzcan et al2019	0	ENV
Ooi2019	1	SAF+ECO
Balali et al2020	0	ENV+SAF+ECO
Chavarrio et al2020	0	SAF+ECO
EEA2020	0	ENV+SAF
EU Proposal 2020/0353 concerning batteries and waste batteries, repealing Directive 2006/66/EC and amending 2020	0	ENV+SAF+SOC
EU Proposal 2020/852 Sustainable Finance 2020	0	ENV+SAF+ECO
EVONIK2020	0	ENV+SAF+SOC+ECO
Fantke et al2020	0	ENV+SOC
Garas et al2020	1	ENV+SAF+SOC+ECO
Linke et al2020	1	ENV
Rincon et al2020	0	ENV+SAF+ECO
Saeli et al2020	1	ENV+SAF
SCP2020	0	ENV+ECO
Segger and Kappenthuler 2020	1	ENV+SAF+ECO
Solvay 20202020	0	ENV+SAF+SOC
Streimikiene at al2020	0	ENV
Venturi et al2020	0	SAF+ECO
Wakeel et al2020	0	SAF+ECO
Wang and Hellweg2020	1	ENV+SAF
Zimmerman et al2020	1	ENV+SAF+ECO
Abdel-Basset et al2021	0	ENV+SAF+SOC+ECO
Agrawal2021	0	ENV+SAF+ECO
alGhatta et al2021	1	ENV+ECO
alkhatib et al2021	0	ENV+SOC
Arias et al2021	1	ENV+SAF+SOC+ECO
Cradle to Cradle2021	0	ENV+SAF+SOC+ECO
CEFIC2021	0	ENV+SAF+SOC+ECO
CHEMSEC2021	0	ENV+SAF+SOC
CLiCC2021	0	ENV+SAF
Crivellari et al2021	0	ENV
Figueiredo et al2021	0	ENV+SOC+ECO
Fleitmann et al2021	1	ENV+ECO
Groetsch et al2021	0	ENV+SAF+ECO
Hatefi et al2021	0	ENV+SAF+SOC+ECO
IFRA-IOFI2021	0	ENV+SAF+SOC
NATRUE 2021	0	ENV+SAF+SOC
Platform on Sustainable Finance2021	0	ENV+SAF+ECO
Tian et al2021	0	ENV+SAF+ECO
UN2021	1	ENV+SAF+SOC
VinylPlus2021	0	ENV
Blue Angel2021	0	SAF+SOC
Bluesign2021	0	SAF
Clariant Eco Tain2021	0	ENV+SAF+ECO
GOTS2021	0	SAF+SOC
Green Seal2021	0	SAF+SOC
Greensuite® 2021	0	ENV+SAF
Higg product tool2021	0	ENV
Nordic Swan Ecolabel2021	0	SAF+SOC
Okokpujie2021	0	ECO
TCO certified2021	0	SAF+SOC
Acar et al2022	0	ENV+SAF+SOC
Hap et al2022	0	ENV+SAF+ECO
Hossain et al2022	1	ENV+ECO
Janošovský et al2022	0	ENV+SAF+ECO
Markatos and Pantelakis2022	0	ENV+ECO
Opn2022	1	ENV+SAF
Scheneider et al2022	0	ENV
van Dijk et al2022	1	ENV+SAF
Global Sustainability Standards Board (GSSB) GRI 301: Materials2016	0	SAF
Majgaonkar et al.2022	1	ENV+ECO
Zapata Boada et al2021	1	ENV+SAF+ECO
Zapata Boada et al2022	0	ENV+SAF+ECO
Tinoco Saenz2022	1	ENV+ECO
Masrura et al.2022	1	ENV+SAF+ECO
Xiang et al.2022	1	ENV+SAF+ECO
García-Velásquez C.2023	1	ENV
Soeteman-Hernández et al.2023	0	ENV+SAF+SOC
Pizzol et al.2023	1	ENV+SAF+SOC+ECO
OECD2022	1	ENV+SAF+SOC
OECD2021	0	ENV+SAF
Tony Phan et al.2015	1	ENV+SAF
Leseurre et al.2014	1	ENV
Roschangar et al.2018	1	ENV

## Sheet: Analysis of indicators (2)
Year	Authors	Ref	Column1	Applied to early stage design	Type of document	Organization	DOI	Comments	Type	Function	Sector	sub-type OLD	LCA	LCT	Decision Procedure	Uncertainty	SAFETY	Dimension	Level aspect	Indicator	Value			NAME ERRR	Name correct	Count
1996	Stefanis et al	Stefanis et al1996		yes	Scientific article	Academia	https://doi.org/10.1016/0098-1354(96)00243-8		Chemicals	Solvents	not specified	Solvents		1	-	no	1	Environmental	Climate Change	Climate change (conceptual)	1			Climate change (conceptual)	Climate change (conceptual)	4
1996	Stefanis et al	Stefanis et al1996		yes	Scientific article	Academia	https://doi.org/10.1016/0098-1354(96)00243-8		Chemicals	Solvents	not specified	Solvents		1	-	no	1	Environmental	Stratospheric ozone Depletion	Ozone depletion (conceptual)	1			Ozone depletion (conceptual)	Ozone depletion (conceptual)	1
1996	Stefanis et al	Stefanis et al1996		yes	Scientific article	Academia	https://doi.org/10.1016/0098-1354(96)00243-8		Chemicals	Solvents	not specified	Solvents		1	-	no	1	Environmental	Air emission	Critical air mass (%)	1			Critical air mass (%)	Critical air mass (%)	2
1996	Stefanis et al	Stefanis et al1996		yes	Scientific article	Academia	https://doi.org/10.1016/0098-1354(96)00243-8		Chemicals	Solvents	not specified	Solvents		1	-	no	1	Environmental	Water emission	Critical water mass (%)	1			Critical water mass (%)	Critical water mass (%)	2
1996	Stefanis et al	Stefanis et al1996		yes	Scientific article	Academia	https://doi.org/10.1016/0098-1354(96)00243-8		Chemicals	Solvents	not specified	Solvents		1	-	no	1	Resources-, processing, and product- related	Resources: types, quantity, and efficiency considerations	Amount of (solid/water) waste (kg or %)	1			Amount of (solid/water) waste (kg or %)	Amount of (solid/water) waste (kg or %)	17
1996	Stefanis et al	Stefanis et al1996		yes	Scientific article	Academia	https://doi.org/10.1016/0098-1354(96)00243-8		Chemicals	Solvents	not specified	Solvents		1	-	no	1	Resources-, processing, and product- related	Circularity	Boiling temperature (°C)	1			Boiling temperature (°C)	Boiling temperature (°C)	9
1998	Pistikopoulos and Stefanis	Pistikopoulos and Stefanis1998		yes	Scientific article	Academia	https://doi.org/10.1016/S0098-1354(97)00255-1		Chemicals	Solvents	not specified	Solvents		1	-	no	1	Environmental	Climate Change	GWP 100 (kg CO₂eq)	1			GWP 100 (kg CO₂eq)	GWP 100 (kg CO₂eq)	87
1998	Pistikopoulos and Stefanis	Pistikopoulos and Stefanis1998		yes	Scientific article	Academia	https://doi.org/10.1016/S0098-1354(97)00255-1		Chemicals	Solvents	not specified	Solvents		1	-	no	1	Environmental	Acidification	Atmospheric acidification (kg SO2eq)	1			Atmospheric acidification (kg SO2eq)	Atmospheric acidification (kg SO2eq)	2
1998	Pistikopoulos and Stefanis	Pistikopoulos and Stefanis1998		yes	Scientific article	Academia	https://doi.org/10.1016/S0098-1354(97)00255-1		Chemicals	Solvents	not specified	Solvents		1	-	no	1	Environmental	Stratospheric ozone Depletion	Ozone depletion potential (kg CFC-11)	1			Ozone depletion potential (kg CFC-11)	Ozone depletion potential (kg CFC-11)	25
1998	Pistikopoulos and Stefanis	Pistikopoulos and Stefanis1998		yes	Scientific article	Academia	https://doi.org/10.1016/S0098-1354(97)00255-1		Chemicals	Solvents	not specified	Solvents		1	-	no	1	Environmental	Photochemical Ozone Formation	POCP (kg of ethene-eq or Kg NMVOC or kg O3)	1			POCP (kg of ethene-eq or Kg NMVOC or kg O3)	POCP (kg of ethene-eq or Kg NMVOC or kg O3)	25
1998	Pistikopoulos and Stefanis	Pistikopoulos and Stefanis1998		yes	Scientific article	Academia	https://doi.org/10.1016/S0098-1354(97)00255-1		Chemicals	Solvents	not specified	Solvents		1	-	no	1	Environmental	Resources	Resource use/depletion - fossil (MJ)	1			Resource use/depletion - fossil (MJ)	Resource use/depletion - fossil (MJ)	14
1998	Pistikopoulos and Stefanis	Pistikopoulos and Stefanis1998		yes	Scientific article	Academia	https://doi.org/10.1016/S0098-1354(97)00255-1		Chemicals	Solvents	not specified	Solvents		1	-	no	1	Environmental	Air emission	Dimethylformamide (g)	1			Dimethylformamide (g)	Dimethylformamide (g)	3
1998	Pistikopoulos and Stefanis	Pistikopoulos and Stefanis1998		yes	Scientific article	Academia	https://doi.org/10.1016/S0098-1354(97)00255-1		Chemicals	Solvents	not specified	Solvents		1	-	no	1	Environmental	Air emission	Critical air mass (%)	1			#N/A	Waste (incl. emissions)/recycling treatment cost (€)	4
1998	Pistikopoulos and Stefanis	Pistikopoulos and Stefanis1998		yes	Scientific article	Academia	https://doi.org/10.1016/S0098-1354(97)00255-1		Chemicals	Solvents	not specified	Solvents		1	-	no	1	Environmental	Water emission	Critical water mass (%)	1			Terrestrial acidification (kg SO2eq)	Terrestrial acidification (kg SO2eq)	12
1998	Pistikopoulos and Stefanis	Pistikopoulos and Stefanis1998		yes	Scientific article	Academia	https://doi.org/10.1016/S0098-1354(97)00255-1		Chemicals	Solvents	not specified	Solvents		1	-	no	1	Resources-, processing, and product- related	Resources: types, quantity, and efficiency considerations	Amount of (solid/water) waste (kg or %)	1			Eutrophication potential (kg of phosphate )	Eutrophication potential (kg of phosphate )	19
1998	Pistikopoulos and Stefanis	Pistikopoulos and Stefanis1998		yes	Scientific article	Academia	https://doi.org/10.1016/S0098-1354(97)00255-1		Chemicals	Solvents	not specified	Solvents		1	-	no	1	#N/A	#N/A	Waste (incl. emissions)/recycling treatment cost (€)	1			Total organic carbon (kg)	Total organic carbon (kg)	4
2004	Jiménez-Gonzalez et al	Jiménez-Gonzalez et al2004		yes	Scientific article	Industry	https://doi.org/10.1007/s10098-004-0245-z	Benchmark - solvent with better env. Profile	Chemicals	Solvents	Pharmaceutical	Solvents	1		A green/yellow/red color coding system previously employed in other GSK tools is used to differentiate degrees of life cycle performance amongst the solvents included: A “green” rating is given to those solvents with the smallest life cycle impact profiles (scores of 8 or larger). A “red” rating is given to those solvents with the largest life cycle impact profiles (scores of 3 or less). A “yello…	no	1	Environmental	Climate Change	GWP 100 (kg CO₂eq)	1			Renewable or fossil? (yes/no)	Renewable or fossil? (yes/no)	18
2004	Jiménez-Gonzalez et al	Jiménez-Gonzalez et al2004		yes	Scientific article	Industry	https://doi.org/10.1007/s10098-004-0245-z	Benchmark - solvent with better env. Profile	Chemicals	Solvents	Pharmaceutical	Solvents	1		A green/yellow/red color coding system previously employed in other GSK tools is used to differentiate degrees of life cycle performance amongst the solvents included: A “green” rating is given to those solvents with the smallest life cycle impact profiles (scores of 8 or larger). A “red” rating is given to those solvents with the largest life cycle impact profiles (scores of 3 or less). A “yello…	no	1	Environmental	Acidification	Terrestrial acidification (kg SO2eq)	1			Water consumption (m3)	Water consumption (m3)	29
2004	Jiménez-Gonzalez et al	Jiménez-Gonzalez et al2004		yes	Scientific article	Industry	https://doi.org/10.1007/s10098-004-0245-z	Benchmark - solvent with better env. Profile	Chemicals	Solvents	Pharmaceutical	Solvents	1		A green/yellow/red color coding system previously employed in other GSK tools is used to differentiate degrees of life cycle performance amongst the solvents included: A “green” rating is given to those solvents with the smallest life cycle impact profiles (scores of 8 or larger). A “red” rating is given to those solvents with the largest life cycle impact profiles (scores of 3 or less). A “yello…	no	1	Environmental	Eutrophication	Eutrophication potential (kg of phosphate )	1			Net mass of materials consumed (kg)	Net mass of materials consumed (kg)	6
2004	Jiménez-Gonzalez et al	Jiménez-Gonzalez et al2004		yes	Scientific article	Industry	https://doi.org/10.1007/s10098-004-0245-z	Benchmark - solvent with better env. Profile	Chemicals	Solvents	Pharmaceutical	Solvents	1		A green/yellow/red color coding system previously employed in other GSK tools is used to differentiate degrees of life cycle performance amongst the solvents included: A “green” rating is given to those solvents with the smallest life cycle impact profiles (scores of 8 or larger). A “red” rating is given to those solvents with the largest life cycle impact profiles (scores of 3 or less). A “yello…	no	1	Environmental	Photochemical Ozone Formation	POCP (kg of ethene-eq or Kg NMVOC or kg O3)	1			Energy consumption (kWh or MJ)	Energy consumption (kWh or MJ)	37
2004	Jiménez-Gonzalez et al	Jiménez-Gonzalez et al2004		yes	Scientific article	Industry	https://doi.org/10.1007/s10098-004-0245-z	Benchmark - solvent with better env. Profile	Chemicals	Solvents	Pharmaceutical	Solvents	1		A green/yellow/red color coding system previously employed in other GSK tools is used to differentiate degrees of life cycle performance amongst the solvents included: A “green” rating is given to those solvents with the smallest life cycle impact profiles (scores of 8 or larger). A “red” rating is given to those solvents with the largest life cycle impact profiles (scores of 3 or less). A “yello…	no	1	Environmental	Water emission	Total organic carbon (kg)	1			Reaction efficiency (%)	Reaction efficiency (%)	10
2004	Jiménez-Gonzalez et al	Jiménez-Gonzalez et al2004		yes	Scientific article	Industry	https://doi.org/10.1007/s10098-004-0245-z	Benchmark - solvent with better env. Profile	Chemicals	Solvents	Pharmaceutical	Solvents	1		A green/yellow/red color coding system previously employed in other GSK tools is used to differentiate degrees of life cycle performance amongst the solvents included: A “green” rating is given to those solvents with the smallest life cycle impact profiles (scores of 8 or larger). A “red” rating is given to those solvents with the largest life cycle impact profiles (scores of 3 or less). A “yello…	no	1	Resources-, processing, and product- related	Resources: types, quantity, and efficiency considerations	Renewable or fossil? (yes/no)	1			Atom economy (%)	Atom economy (%)	5
2004	Jiménez-Gonzalez et al	Jiménez-Gonzalez et al2004		yes	Scientific article	Industry	https://doi.org/10.1007/s10098-004-0245-z	Benchmark - solvent with better env. Profile	Chemicals	Solvents	Pharmaceutical	Solvents	1		A green/yellow/red color coding system previously employed in other GSK tools is used to differentiate degrees of life cycle performance amongst the solvents included: A “green” rating is given to those solvents with the smallest life cycle impact profiles (scores of 8 or larger). A “red” rating is given to those solvents with the largest life cycle impact profiles (scores of 3 or less). A “yello…	no	1	Resources-, processing, and product- related	Resources: types, quantity, and efficiency considerations	Water consumption (m3)	1			Purity of recovered solvent (%)	Purity of recovered solvent (%)	2
2004	Jiménez-Gonzalez et al	Jiménez-Gonzalez et al2004		yes	Scientific article	Industry	https://doi.org/10.1007/s10098-004-0245-z	Benchmark - solvent with better env. Profile	Chemicals	Solvents	Pharmaceutical	Solvents	1		A green/yellow/red color coding system previously employed in other GSK tools is used to differentiate degrees of life cycle performance amongst the solvents included: A “green” rating is given to those solvents with the smallest life cycle impact profiles (scores of 8 or larger). A “red” rating is given to those solvents with the largest life cycle impact profiles (scores of 3 or less). A “yello…	no	1	Resources-, processing, and product- related	Resources: types, quantity, and efficiency considerations	Net mass of materials consumed (kg)	1			Recyclability/circularity (conceptual)	Recyclability/circularity (conceptual)	19
2004	Jiménez-Gonzalez et al	Jiménez-Gonzalez et al2004		yes	Scientific article	Industry	https://doi.org/10.1007/s10098-004-0245-z	Benchmark - solvent with better env. Profile	Chemicals	Solvents	Pharmaceutical	Solvents	1		A green/yellow/red color coding system previously employed in other GSK tools is used to differentiate degrees of life cycle performance amongst the solvents included: A “green” rating is given to those solvents with the smallest life cycle impact profiles (scores of 8 or larger). A “red” rating is given to those solvents with the largest life cycle impact profiles (scores of 3 or less). A “yello…	no	1	Resources-, processing, and product- related	Energy	Energy consumption (kWh or MJ)	1			Recycled content (%)	Recycled content (%)	12
2005	Gani et al	Gani et al2005		yes	Scientific article	Industry	https://doi.org/10.1016/j.compchemeng.2005.02.021		Chemicals	Solvents	not specified	Solvents			score table to assign scores to feasible solvents based on the properties	no	1	Resources-, processing, and product- related	Resources: types, quantity, and efficiency considerations	Reaction efficiency (%)	1			#N/A	Occupational health & safety (concept)	10
2005	Gani et al	Gani et al2005		yes	Scientific article	Industry	https://doi.org/10.1016/j.compchemeng.2005.02.021		Chemicals	Solvents	not specified	Solvents			score table to assign scores to feasible solvents based on the properties	no	1	Resources-, processing, and product- related	Resources: types, quantity, and efficiency considerations	Atom economy (%)	1			Human rights (conceptual)	Human rights (conceptual)	5
2005	Gani et al	Gani et al2005		yes	Scientific article	Industry	https://doi.org/10.1016/j.compchemeng.2005.02.021		Chemicals	Solvents	not specified	Solvents			score table to assign scores to feasible solvents based on the properties	no	1	Resources-, processing, and product- related	Circularity	Purity of recovered solvent (%)	1			#N/A	No child labour	12
2005	Gani et al	Gani et al2005		yes	Scientific article	Industry	https://doi.org/10.1016/j.compchemeng.2005.02.021		Chemicals	Solvents	not specified	Solvents			score table to assign scores to feasible solvents based on the properties	no	1	Resources-, processing, and product- related	Energy	Energy consumption (kWh or MJ)	1			#N/A	Freedom of association	7
2006	Rossi et al	Rossi et al2006		yes	Guidance	Academia	http://sustainableproduction.org/downloads/FinalAltsAssess06_000.pdf	Alternative Assessment - Lowell	Chemicals	not specified	not specified	Chemicals	1		they provide a set of decision rules suggesting that each organization should develop decision rules	no	1	Environmental	Climate Change	GWP 100 (kg CO₂eq)	1			Profitability (conceptual)	Profitability (conceptual)	8
2006	Rossi et al	Rossi et al2006		yes	Guidance	Academia	http://sustainableproduction.org/downloads/FinalAltsAssess06_000.pdf	Alternative Assessment - Lowell	Chemicals	not specified	not specified	Chemicals	1		they provide a set of decision rules suggesting that each organization should develop decision rules	no	1	Resources-, processing, and product- related	Circularity	Recyclability/circularity (conceptual)	1			(Total) production cost (€)	(Total) production cost (€)	25
2006	Rossi et al	Rossi et al2006		yes	Guidance	Academia	http://sustainableproduction.org/downloads/FinalAltsAssess06_000.pdf	Alternative Assessment - Lowell	Chemicals	not specified	not specified	Chemicals	1		they provide a set of decision rules suggesting that each organization should develop decision rules	no	1	Resources-, processing, and product- related	Circularity	Recycled content (%)	1			Cumulative energy demand (MJ)	Cumulative energy demand (MJ)	17
2006	Rossi et al	Rossi et al2006		yes	Guidance	Academia	http://sustainableproduction.org/downloads/FinalAltsAssess06_000.pdf	Alternative Assessment - Lowell	Chemicals	not specified	not specified	Chemicals	1		they provide a set of decision rules suggesting that each organization should develop decision rules	no	1	#N/A	#N/A	Occupational health & safety (concept)	1			Human toxicity potential (kg 1,4 DCB eq or CTUh)	Human toxicity potential (kg 1,4 DCB eq or CTUh)	9
2006	Rossi et al	Rossi et al2006		yes	Guidance	Academia	http://sustainableproduction.org/downloads/FinalAltsAssess06_000.pdf	Alternative Assessment - Lowell	Chemicals	not specified	not specified	Chemicals	1		they provide a set of decision rules suggesting that each organization should develop decision rules	no	1	Social	local community	Human rights (conceptual)	1			Land occupation (m2a crop eq)	Land occupation (m2a crop eq)	8
2006	Rossi et al	Rossi et al2006		yes	Guidance	Academia	http://sustainableproduction.org/downloads/FinalAltsAssess06_000.pdf	Alternative Assessment - Lowell	Chemicals	not specified	not specified	Chemicals	1		they provide a set of decision rules suggesting that each organization should develop decision rules	no	1	#N/A	#N/A	No child labour	1			#N/A	LCC cost (€)	17
2006	Rossi et al	Rossi et al2006		yes	Guidance	Academia	http://sustainableproduction.org/downloads/FinalAltsAssess06_000.pdf	Alternative Assessment - Lowell	Chemicals	not specified	not specified	Chemicals	1		they provide a set of decision rules suggesting that each organization should develop decision rules	no	1	#N/A	#N/A	Freedom of association	1			Terrestrial ecotoxicity (g C6H4CI2-eq)	Terrestrial ecotoxicity (g C6H4CI2-eq)	10
2006	Rossi et al	Rossi et al2006		yes	Guidance	Academia	http://sustainableproduction.org/downloads/FinalAltsAssess06_000.pdf	Alternative Assessment - Lowell	Chemicals	not specified	not specified	Chemicals	1		they provide a set of decision rules suggesting that each organization should develop decision rules	no	1	Economic	Profitability	Profitability (conceptual)	1			Freshwater eutrophication potential (kg P eq)	Freshwater eutrophication potential (kg P eq)	10
2006	Rossi et al	Rossi et al2006		yes	Guidance	Academia	http://sustainableproduction.org/downloads/FinalAltsAssess06_000.pdf	Alternative Assessment - Lowell	Chemicals	not specified	not specified	Chemicals	1		they provide a set of decision rules suggesting that each organization should develop decision rules	no	1	Economic	Internal cost	(Total) production cost (€)	1			Financial profit (€)	Financial profit (€)	4
2007	Capello et al	Capello et al2007		yes	Scientific article	Academia	https://doi.org/10.1039/b617536h		Chemicals	Solvents	chemical industry	Solvents	1		-	no	1	Resources-, processing, and product- related	Energy	Cumulative energy demand (MJ)	1			#N/A	TCC	3
[truncated: 1,065 more rows]
